# Supplementary material for: Reductive Metabolism of Ellagitannins in the Young Leaves of Castanopsis sieboldii
Source: PubMed Central journal article supplement (PMC6930603; doi:10.3390/molecules24234279), 2019-11-24
Supplement: molecules-24-04279-s001.pdf [file molecules-24-04279-s001.pdf]

# Supplementary Materials

## Reductive Metabolism of Ellagitannins in the Young Leaves of *Castanopsis sieboldii*

Hatsumi Wakamatsu<sup>1,2</sup>, Sumire Tanaka<sup>3</sup>, Yosuke Matsuo<sup>1</sup>, Yoshinori Saito<sup>1</sup>, Koyo Nishida<sup>2</sup>,  
and Takashi Tanaka<sup>1,\*</sup>

- <sup>1</sup> Department of Natural Product Chemistry, Graduate School of Biomedical Sciences, Nagasaki University,  
1-14 Bunkyo-machi, Nagasaki 852-8521, Japan; E-Mails: bb55316407@ms.nagasaki-u.ac.jp (H.W.);  
y-matsuo@nagasaki-u.ac.jp (Y.M.); saiyoshi@nagasaki-u.ac.jp (Y.S.)
- <sup>2</sup> Department of Pharmaceutics, Graduate School of Biomedical Sciences, Nagasaki University, 1-7-1  
Sakamoto, Nagasaki 852-8501, Japan; E-Mail: koyo-n@nagasaki-u.ac.jp (K.N.)
- <sup>3</sup> Department of Natural Product Chemistry, School of Pharmaceutical Sciences, Nagasaki University, 1-  
14 Bunkyo-machi, Nagasaki 852-8521, Japan; E-Mail: bb30114020@ms.nagasaki-u.ac.jp (S.T.)

page

- 1 Table S1. <sup>1</sup>H (500 MHz) and <sup>13</sup>C (126 MHz) NMR Data for **9u** and **10o** ( $\delta$  in ppm, J in Hz, Measured in pyridine-*d*<sub>5</sub>)
- 2 Table S2. <sup>1</sup>H (500 MHz) and <sup>13</sup>C (126 MHz) NMR Data for **11o** and **12o** ( $\delta$  in ppm, J in Hz, Measured in pyridine-*d*<sub>5</sub>)
- 3 Figure S1. <sup>1</sup>H NMR spectrum of **1o** (pyridine-*d*<sub>5</sub>, 500 MHz)
- 4 Figure S2. <sup>13</sup>C NMR spectrum of **1o** (pyridine-*d*<sub>5</sub>, 126 MHz)
- 5 Figure S3. <sup>1</sup>H-<sup>1</sup>H COSY spectrum of **1o** (pyridine-*d*<sub>5</sub>, 500 MHz)
- 6 Figure S4. HSQC spectrum of **1o** (pyridine-*d*<sub>5</sub>)
- 7 Figure S5. HMBC spectrum of **1o** (pyridine-*d*<sub>5</sub>)
- 8 Figure S6. <sup>1</sup>H NMR spectrum of **1u** (pyridine-*d*<sub>5</sub>, 500 MHz)
- 9 Figure S7. <sup>13</sup>C NMR spectrum of **1u** (pyridine-*d*<sub>5</sub>, 126 MHz)
- 10 Figure S8. <sup>1</sup>H-<sup>1</sup>H COSY spectrum of **1u** (pyridine-*d*<sub>5</sub>, 500 MHz)
- 11 Figure S9. HSQC spectrum of **1u** (pyridine-*d*<sub>5</sub>)
- 12 Figure S10. HMBC spectrum of **1u** (pyridine-*d*<sub>5</sub>)
- 13 Figure S11. NOESY spectrum of **1o,u** (pyridine-*d*<sub>5</sub>, 500 MHz)
- 14 Figure S12. <sup>1</sup>H NMR spectrum of **2** (pyridine-*d*<sub>5</sub>, 500 MHz)
- 15 Figure S13. <sup>13</sup>C NMR spectrum of **2** (pyridine-*d*<sub>5</sub>, 126 MHz)
- 16 Figure S14. <sup>1</sup>H-<sup>1</sup>H COSY spectrum of **2o** (pyridine-*d*<sub>5</sub>, 500 MHz)
- 17 Figure S15. HSQC spectrum of **2** (pyridine-*d*<sub>5</sub>)
- 18 Figure S16. HMBC spectrum of **2** (pyridine-*d*<sub>5</sub>)
- 19 Figure S17. <sup>1</sup>H NMR spectrum of **4** (pyridine-*d*<sub>5</sub>, 500 MHz)
- 20 Figure S18. <sup>13</sup>C NMR spectrum of **4** (pyridine-*d*<sub>5</sub>, 126 MHz)

- 21 Figure S19.  $^1\text{H}$ - $^1\text{H}$  COSY spectrum of **4** (pyridine- $d_5$ , 500 MHz)
- 22 Figure S20. HSQC spectrum of **4** (pyridine- $d_5$ )
- 23 Figure S21. HMBC spectrum of **4** (pyridine- $d_5$ )
- 24 Figure S22. HMBC spectrum of **4** ( $\text{CD}_3\text{OD}$ )
- 25 Figure S23.  $^1\text{H}$  NMR spectrum of **9** (pyridine- $d_5$ , 500 MHz)
- 26 Figure S24.  $^{13}\text{C}$  NMR spectrum of **9** (pyridine- $d_5$ , 126 MHz)
- 27 Figure S25.  $^1\text{H}$ - $^1\text{H}$  COSY spectrum of **9** (pyridine- $d_5$ , 500 MHz)
- 28 Figure S26. HSQC spectrum of **9** (pyridine- $d_5$ )
- 29 Figure S27. HMBC spectrum of **9** (pyridine- $d_5$ )
- 30 Figure S28.  $^1\text{H}$  NMR spectrum of **10** (pyridine- $d_5$ , 500 MHz)
- 31 Figure S29.  $^{13}\text{C}$  NMR spectrum of **10** (pyridine- $d_5$ , 126 MHz)
- 32 Figure S30.  $^1\text{H}$ - $^1\text{H}$  COSY spectrum of **10** (pyridine- $d_5$ , 500 MHz)
- 33 Figure S31. HSQC spectrum of **10** (pyridine- $d_5$ )
- 34 Figure S32. HMBC spectrum of **10** (pyridine- $d_5$ )
- 35 Figure S33.  $^1\text{H}$  NMR spectrum of **11** (pyridine- $d_5$ , 500 MHz)
- 36 Figure S34.  $^{13}\text{C}$  NMR spectrum of **11** (pyridine- $d_5$ , 126 MHz)
- 37 Figure S35.  $^1\text{H}$ - $^1\text{H}$  COSY spectrum of **11** (pyridine- $d_5$ , 500 MHz)
- 38 Figure S36. HSQC spectrum of **11** (pyridine- $d_5$ )
- 39 Figure S37. HMBC spectrum of **11** (pyridine- $d_5$ )
- 40 Figure S38.  $^1\text{H}$  NMR spectrum of **12** (pyridine- $d_5$ , 500 MHz)
- 41 Figure S39.  $^{13}\text{C}$  NMR spectrum of **12** (pyridine- $d_5$ , 126 MHz)
- 42 Figure S40.  $^1\text{H}$ - $^1\text{H}$  COSY spectrum of **12** (pyridine- $d_5$ , 500 MHz)
- 43 Figure S41. HSQC spectrum of **12** (pyridine- $d_5$ )
- 44 Figure S42. HMBC spectrum of **12** (pyridine- $d_5$ )
- 45 Figure S43. Experimental ECD spectra of **1o** and **1u**
- 45 Figure S44. Experimental ECD spectra of **2o,u**
- 46 Figure S45. Lowest-energy conformers of 3,24-(*R*)-HHDP ester of methyl 2 $\alpha$ ,3 $\beta$ ,23,24-tetrahydroxyolean-12-en-28-oate (**4'oA**) and 3,23-(*R*)-HHDP ester of methyl 2 $\alpha$ ,3 $\beta$ ,23,24-tetrahydroxyolean-12-en-28-oate (**4'oB**) at the B3LYP/6-31G(d,p) level in pyridine.
- 47 Table S3. Calculated  $^1\text{H}$  NMR chemical shifts of **4'oA**.
- 48 Table S4. Calculated  $^1\text{H}$  NMR chemical shifts of **4'oB**.
- 49 Table S5. Calculated  $^{13}\text{C}$  NMR chemical shifts of **4'oA**.
- 50 Table S6. Calculated  $^{13}\text{C}$  NMR chemical shifts of **4'oB**.
- 51 Figure S46. Correlation plots of experimental  $^1\text{H}$  NMR chemical shifts versus corresponding calculated  $^1\text{H}$  NMR chemical shifts of **4'o**.

- 51 Figure S47. Correlation plots of experimental  $^{13}\text{C}$  NMR chemical shifts versus corresponding calculated  $^{13}\text{C}$  NMR chemical shifts of **4'o**.
- 52 Table S7. The DP4+ probability analysis of **4'o**.
- 53 Cartesian coordinates of the lowest-energy conformer of **4'oA (4'oA-1)** at the B3LYP/6-31G(d,p) level in pyridine (PCM)
- 54 Cartesian coordinates of the lowest-energy conformer of **4'oB (4'oB-1)** at the B3LYP/6-31G(d,p) level in pyridine (PCM).

**Table S1.**  $^1\text{H}$  (500 MHz) and  $^{13}\text{C}$  (125 MHz) NMR Data for **9u** and **10o** ( $\delta$  in ppm,  $J$  in Hz, Measured in pyridine- $d_5$ )

|            | position | <b>9u</b>                        |                 | <b>10o</b>                       |                 |
|------------|----------|----------------------------------|-----------------|----------------------------------|-----------------|
|            |          | $^1\text{H}$                     | $^{13}\text{C}$ | $^1\text{H}$                     | $^{13}\text{C}$ |
| triterpene | 1        | 2.21 (dd, 12.7, 4.9)<br>1.25 (m) | 47.5            | 2.27 (dd, 13.0, 4.6)<br>1.37 (m) | 48.0            |
|            | 2        | 4.23 (m)                         | 68.3            | 4.47 (m)                         | 66.5            |
|            | 3        | 3.42 (d, 9.0)                    | 78.6            | 5.40 (d, 9.5)                    | 79.1            |
|            | 4        |                                  | 48.9            |                                  | 48.6            |
|            | 5        | 1.41 (m)                         | 57.40           | 1.54 (m)                         | 57.3            |
|            | 6        | 2.45 (m)<br>1.62 (m)             | 20.0            | 2.46 (d, 13.2)<br>1.66 (m)       | 19.9            |
|            | 7        | 1.57 (m)<br>1.25 (m)             | 33.05           | 1.50 (m)<br>1.24 (m)             | 32.5            |
|            | 8        |                                  | 39.7            |                                  | 39.4            |
|            | 9        | 1.70 (m)                         | 47.6            | 1.76 (m)                         | 47.6            |
|            | 10       |                                  | 38.1            |                                  | 38.2            |
|            | 11       | 1.95 (m)                         | 24.0            | 1.95 (2H, m)                     | 24.1            |
|            | 12       | 5.37 (m)                         | 125.8           | 5.37 (t, 3.4)                    | 122.5           |
|            | 13       |                                  | 138.6           |                                  | 144.3           |
|            | 14       |                                  | 42.4            |                                  | 42.0            |
|            | 15       | 2.41 (m)<br>1.09 (m)             | 28.7            | 2.34 (td, 13.9, 4.6)<br>1.09 (m) | 28.4            |
|            | 16       | 2.03 (m)                         | 24.6            | 2.06 (td, 13.7, 3.8)<br>2.00 (m) | 23.3            |
|            | 17       |                                  | 48.3            |                                  | 46.9            |
|            | 18       | 2.49 (d, 11.0)                   | 53.1            | 3.18 (dd, 13.7, 5.1)             | 41.6            |
|            | 19       | 1.38 (m)                         | 39.3            | 1.72 (m)<br>1.21 (m)             | 46.1            |
|            | 20       | 0.88 (m)                         | 39.1            |                                  | 30.8            |
|            | 21       | 1.34 (m)                         | 30.8            | 1.37 (m)<br>1.09 (m)             | 34.0            |
|            | 22       | 1.92 (m)<br>1.69 (m)             | 36.8            | 1.77 (2H, m)                     | 32.6            |
|            | 23       | 6.04 (d, 11.2)<br>3.73 (d, 11.2) | 71.4            | 5.54 (d, 11.5)<br>3.82 (d, 11.5) | 69.7            |
|            | 24       | 5.31 (d, 11.2)<br>4.40 (m)       | 62.6            | 5.46 (d, 11.7)<br>4.33 (d, 11.5) | 61.8            |
|            | 25       | 0.87 (3H, s)                     | 16.7            | 0.96 (3H, s)                     | 16.5            |
|            | 26       | 1.05 (3H, s)                     | 17.5            | 1.02 (3H, s)                     | 17.3            |
|            | 27       | 1.12 (3H, s)                     | 23.8            | 1.30 (3H, s)                     | 26.2            |
|            | 28       |                                  | 176.2           |                                  | 176.4           |
|            | 29       | 0.92 (d, 6.4)                    | 17.4            | 0.91 (3H, s)                     | 33.1            |
|            | 30       | 0.90 (d, 7.1)                    | 21.3            | 0.89 (3H, s)                     | 23.6            |
| glucose    | 1        | 6.26 (d, 8.1)                    | 95.8            | 6.34 (d, 8.3)                    | 95.9            |
|            | 2        | 4.20 (t, 8.3)                    | 74.2            | 4.21 (t, 8.3)                    | 74.3            |
|            | 3        | 4.28 (t, 8.9)                    | 78.9            | 4.28 (t, 8.8)                    | 79.0            |
|            | 4        | 4.36 (m)                         | 71.1            | 4.37 (t, 9.0)                    | 71.0            |
|            | 5        | 4.02 (m)                         | 79.3            | 4.03 (m)                         | 79.5            |
|            | 6        | 4.44 (m)                         | 62.20           | 4.47 (m)<br>4.42 (dd, 11.7, 4.5) | 62.2            |
| HHDP       | 1,1'     |                                  | 116.5 (2C)      |                                  | 116.7 (2C)      |
|            | 2,2'     |                                  | 127.5, 127.8    |                                  | 127.4, 126.8    |
|            | 3,3'     | 7.16 (s), 7.29 (s)               | 107.3, 108.36   | 7.08 (s), 7.56 (s)               | 107.5, 108.6    |
|            | 4,4'     |                                  | 146.8, 146.6    |                                  | 146.8, 145.91   |
|            | 5,5'     |                                  | 137.8, 137.7    |                                  | 137.8 (2C)      |
|            | 6,6'     |                                  | 146.19, 146.24  |                                  | 145.94 (2C)     |
|            | 7,7'     |                                  | 169.6, 169.8    |                                  | 169.0, 169.6    |
| galloyl    | 1        |                                  |                 |                                  | 121.4           |
|            | 2,6      |                                  |                 | 8.03 (s)                         | 111.9           |
|            | 3,5      |                                  |                 |                                  | 146.3           |
|            | 4        |                                  |                 |                                  | 141.6           |
|            | CO       |                                  |                 |                                  | 167.4           |
|            | 1'       |                                  |                 |                                  |                 |
|            | 2',6'    |                                  |                 |                                  |                 |
|            | 3',5'    |                                  |                 |                                  |                 |
|            | 4'       |                                  |                 |                                  |                 |
| CO         |          |                                  |                 |                                  |                 |

**Table S2.** <sup>1</sup>H (500 MHz) and <sup>13</sup>C (125 MHz) NMR Data for **11o** and **12o** ( $\delta$  in ppm, *J* in Hz, Measured in pyridine-*d*<sub>5</sub>)

|            | position       | <b>11o</b>           |                 | <b>12o</b>           |                 |
|------------|----------------|----------------------|-----------------|----------------------|-----------------|
|            |                | <sup>1</sup> H       | <sup>13</sup> C | <sup>1</sup> H       | <sup>13</sup> C |
| triterpene | 1              | 2.23 (dd, 4.5, 12.8) | 47.82           | 2.28 (m)             | 48.4            |
|            |                | 1.37 (m)             |                 | 1.36 (m)             |                 |
|            | 2              | 4.12 (m)             | 65.3            | 4.47 (m)             | 66.5            |
|            | 3              | 5.74 (d, 10.3)       | 84.8            | 5.38 (m)             | 79.0            |
|            | 4              |                      | 47.80           |                      | 48.4            |
|            | 5              | 1.18 (m)             | 50.8            | 1.52 (m)             | 57.5            |
|            | 6              | 2.04 (m)             | 20.7            | 2.40 (m)             | 19.9            |
|            |                | 1.75 (m)             |                 | 1.59 (m)             |                 |
|            | 7              | 1.22 (m)             | 33.3            | 1.52 (m)             | 32.7            |
|            |                | 1.01 (m)             |                 | 1.17 (m)             |                 |
|            | 8              |                      | 39.9            |                      | 39.4            |
|            | 9              | 1.75 (m)             | 48.5            | 1.73 (m)             | 47.6            |
|            | 10             |                      | 38.8            |                      | 38.0            |
|            | 11             | 1.93 (2H, m)         | 23.9            | 1.95 (m)             | 24.0            |
|            | 12             | 5.40 (m)             | 122.3           | 5.37 (m)             | 122.6           |
|            | 13             |                      | 144.2           |                      | 143.9           |
|            | 14             |                      | 42.2            |                      | 42.2            |
|            | 15             | 2.17 (m)             | 28.1            | 2.18 (m)             | 28.2            |
|            |                | 1.08 (m)             |                 | 1.16 (m)             |                 |
|            | 16             | 2.02 (m)             | 23.5            | 2.08 (m)             | 24.6            |
|            |                | 1.91 (m)             |                 |                      |                 |
|            | 17             |                      | 47.0            |                      | 47.0            |
|            | 18             | 3.15 (dd, 4.9, 13.9) | 41.7            | 3.16 (dd, 13.6, 5.3) | 41.7            |
|            | 19             | 1.68 (m)             | 46.2            | 1.73 (m)             | 46.1            |
|            |                | 1.19 (m)             |                 | 1.22 (m)             |                 |
|            | 20             |                      | 30.7            |                      | 30.6            |
|            | 21             | 1.33 (m)             | 34.0            | 1.37 (m)             | 34.0            |
|            |                | 1.05 (m)             |                 | 1.11 (m)             |                 |
|            | 22             | 1.82 (m)             | 32.5            | 1.81 (m)             | 32.6            |
|            |                | 1.75 (m)             |                 | 1.76 (m)             |                 |
| 23         | 5.51 (d, 11.2) | 69.6                 | 5.54 (d, 11.5)  | 69.7                 |                 |
|            | 4.15 (d, 11.0) |                      | 3.78 (d, 11.5)  |                      |                 |
| 24         | 5.48 (m)       | 63.1                 | 5.41 (m)        | 61.8                 |                 |
|            | 4.48 (m)       |                      | 4.32 (m)        |                      |                 |
| 25         | 1.12 (3H, s)   | 17.7                 | 0.94 (3H, s)    | 16.7                 |                 |
| 26         | 1.05 (3H, s)   | 17.5                 | 0.96 (3H, s)    | 17.3                 |                 |
| 27         | 1.14 (3H, s)   | 26.0                 | 1.21 (3H, s)    | 26.0                 |                 |
| 28         |                | 176.4                |                 | 176.3                |                 |
| 29         | 0.87 (3H, s)   | 33.1                 | 0.91 (3H, s)    | 33.1                 |                 |
| 30         | 0.84 (3H, s)   | 23.59                | 0.88 (3H, s)    | 23.6                 |                 |
| glucose    | 1              | 6.32 (d, 7.8)        | 95.82           | 6.39 (d, 8.3)        | 95.4            |
|            | 2              | 4.22 (t, 8.4)        | 74.14           | 4.30 (m)             | 72.3            |
|            | 3              | 4.27 (t, 8.8)        | 78.91           | 6.15 (t, 9.3)        | 80.10           |
|            | 4              | 4.37 (t, 9.0)        | 71.1            | 4.55 (t, 9.3)        | 68.90           |
|            | 5              | 4.06 (m)             | 79.4            | 4.04 (m)             | 79.1            |
|            | 6              | 4.42 (m)             | 62.3            | 4.41 (dd, 3.2, 6.8)  | 61.7            |
|            | 4.47 (m)       |                      |                 |                      |                 |
| HHDP       | 1,1'           |                      | 116.3, 116.56   |                      | 116.7 (2C)      |
|            | 2,2'           |                      | 126.6, 127.2    |                      | 127.4, 126.8    |
|            | 3,3'           | 7.14 (s), 6.90 (s)   | 106.7, 108.0    | 7.07 (s), 7.53 (s)   | 107.6, 108.6    |
|            | 4,4'           |                      | 146.7, 146.5    |                      | 146.8, 145.9    |
|            | 5,5'           |                      | 137.57, 137.8   |                      | 137.8, 137.9    |
|            | 6,6'           |                      | 146.0, 146.4    |                      | 146.0 (2C)      |
|            | 7,7'           |                      | 169.9, 169.8    |                      | 169.00, 169.5   |
| galloyl    | 1              |                      | 121.74          |                      | 121.3           |
|            | 2,6            | 7.93 (s)             | 110.4           | 8.01 (s)             | 111.9           |
|            | 3,5            |                      | 147.4           |                      | 146.5           |
|            | 4              |                      | 140.8           |                      | 141.5           |
|            | CO             |                      | 168.0           |                      | 167.3           |
|            | 1'             |                      |                 |                      | 121.6           |
|            | 2',6'          |                      |                 | 7.86 (s)             | 110.5           |
|            | 3',5'          |                      |                 |                      | 147.4           |
|            | 4'             |                      |                 |                      | 140.7           |
|            | CO             |                      |                 |                      | 167.2           |

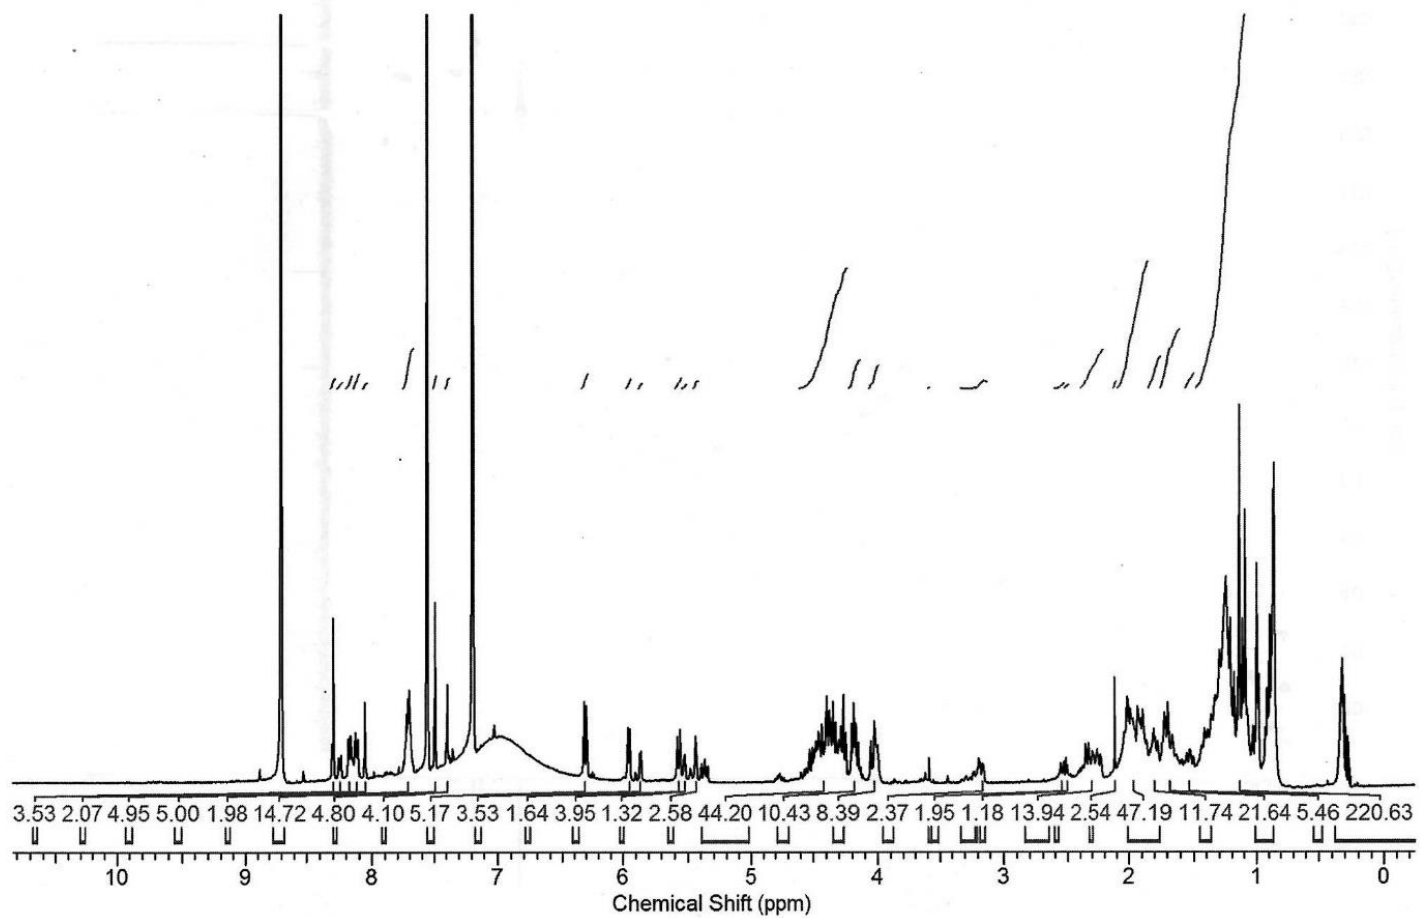

Figure S1.  $^1\text{H}$  NMR spectrum of **1o** (pyridine- $d_5$ , 500 MHz)

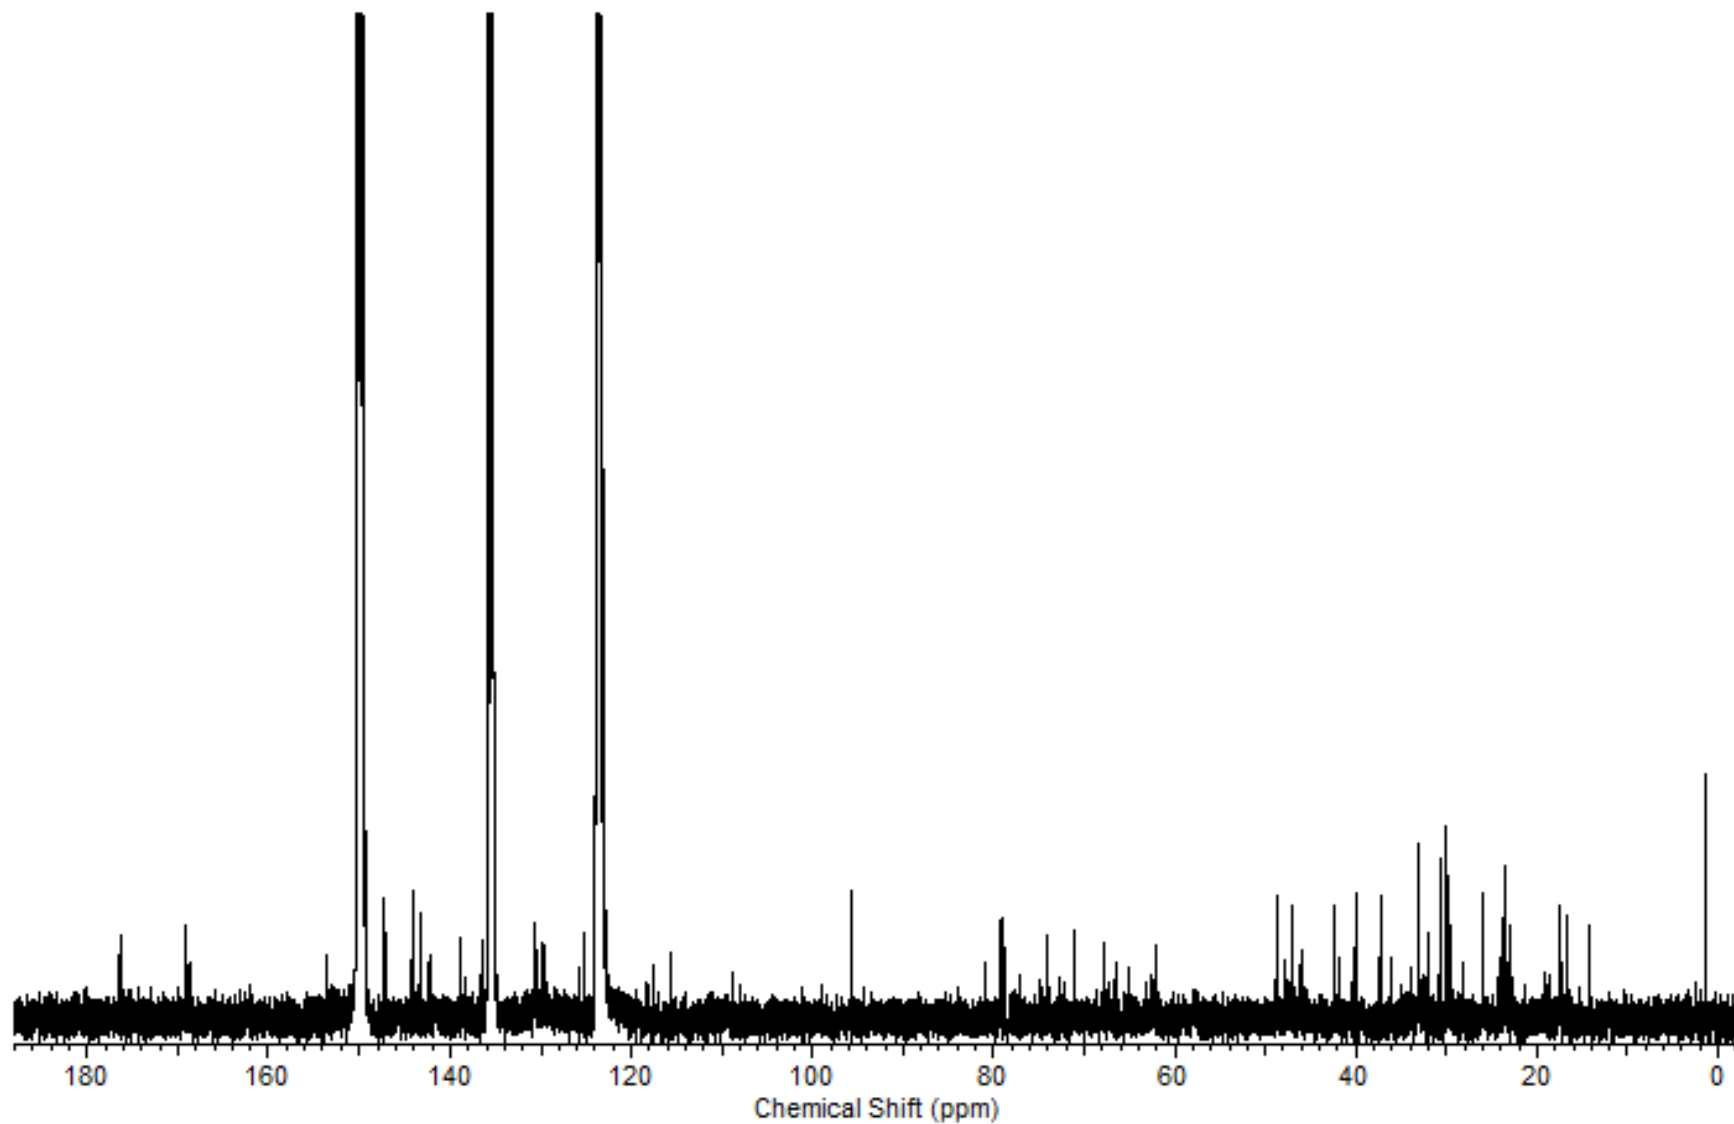

Figure S2.  $^{13}\text{C}$  NMR spectrum of **1o** (pyridine- $d_5$ , 126 MHz)

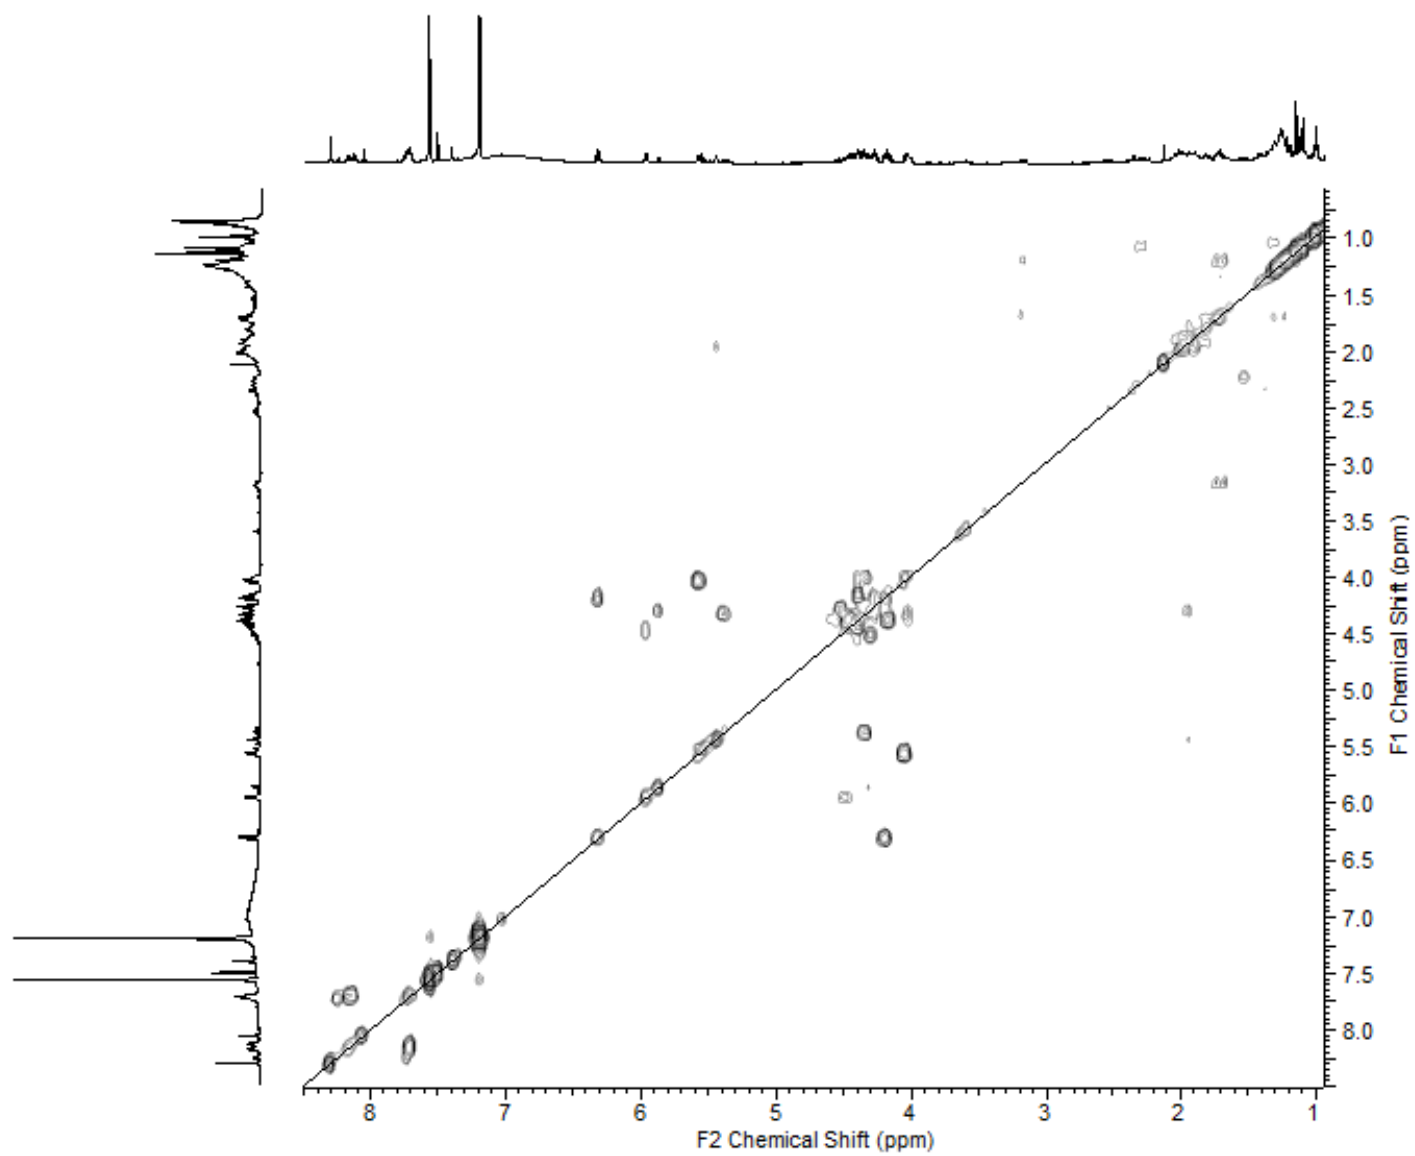

Figure S3.  $^1\text{H}$ - $^1\text{H}$  COSY spectrum of **1o** (pyridine- $d_5$ , 500 MHz)



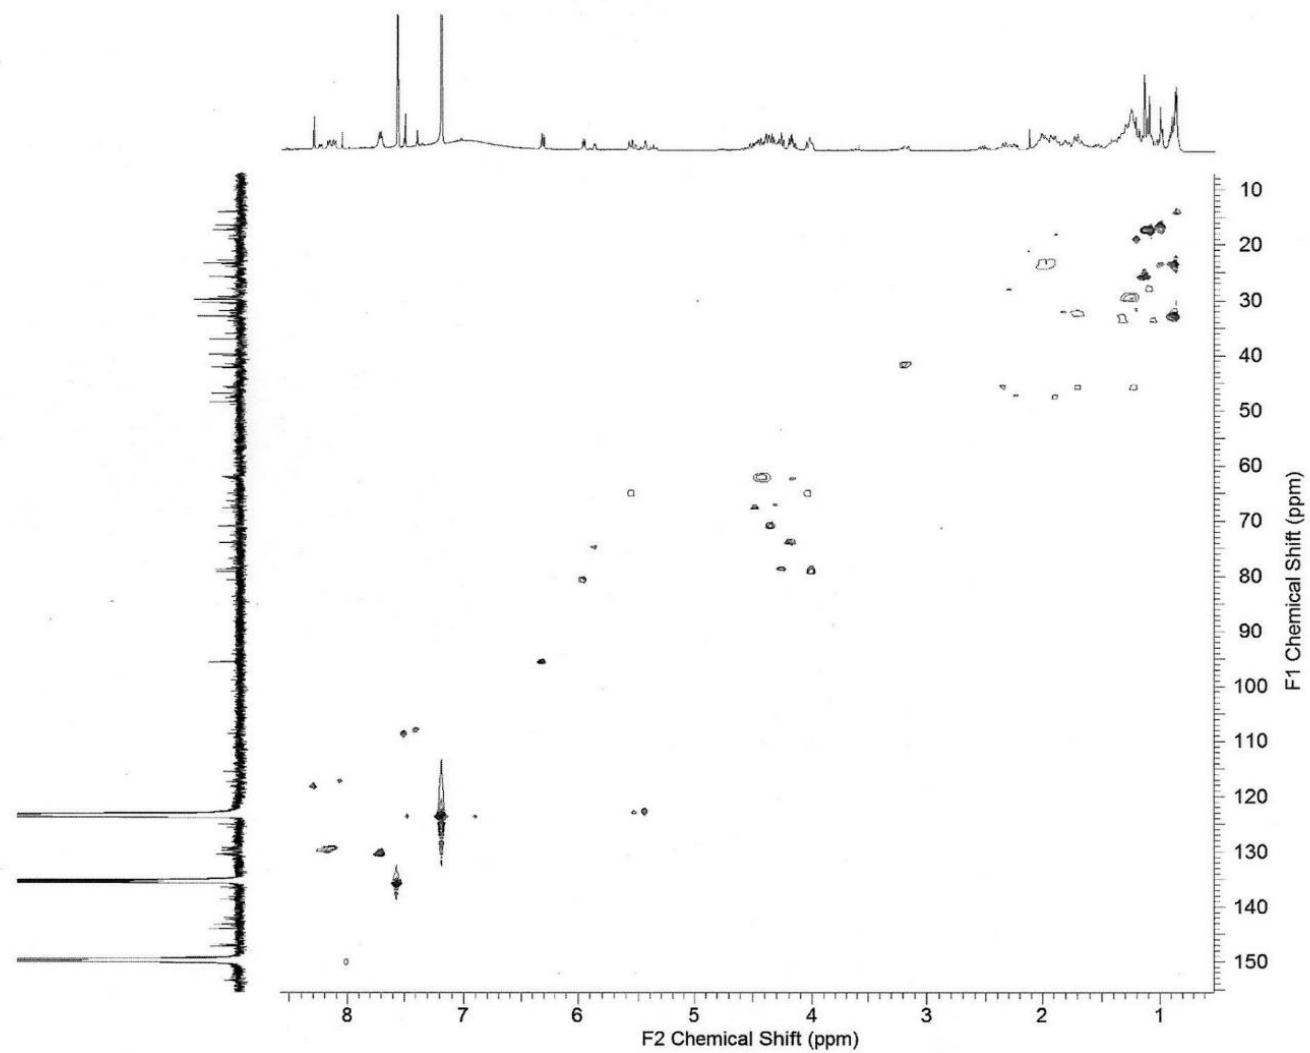

Figure S4. HSQC spectrum of **1o** (pyridine-*d*<sub>5</sub>)

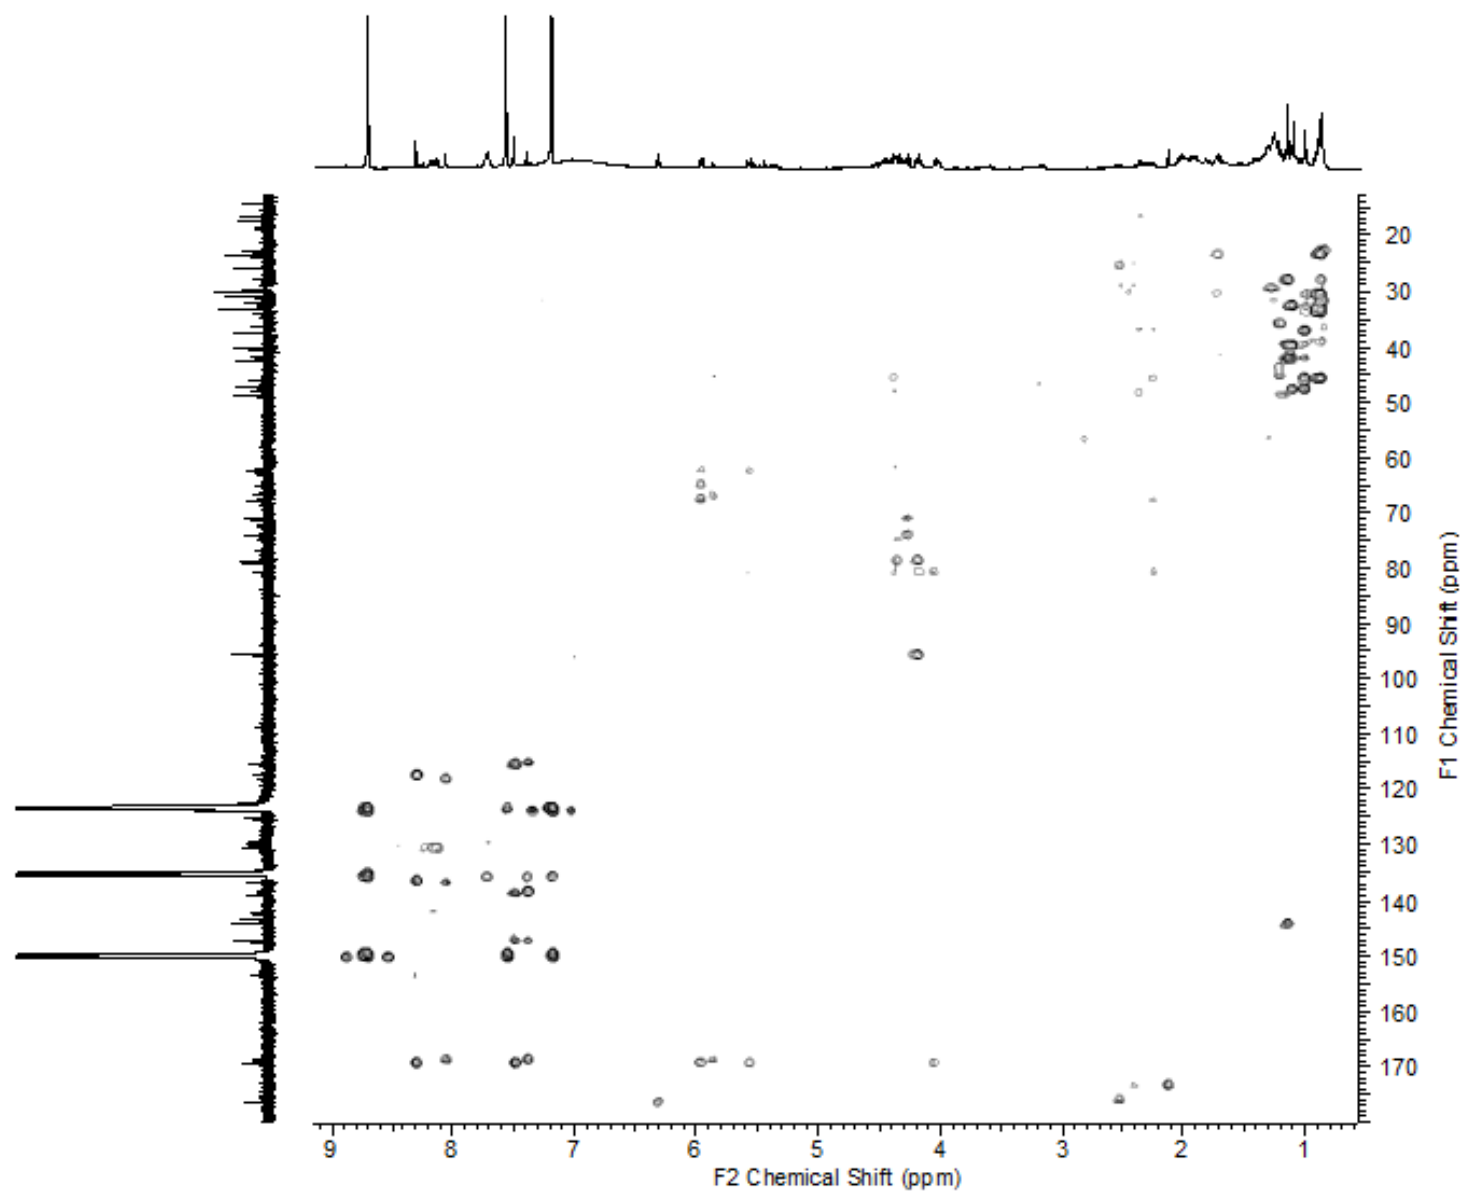

Figure S5. HMBC spectrum of **1o** (pyridine-*d*<sub>5</sub>)

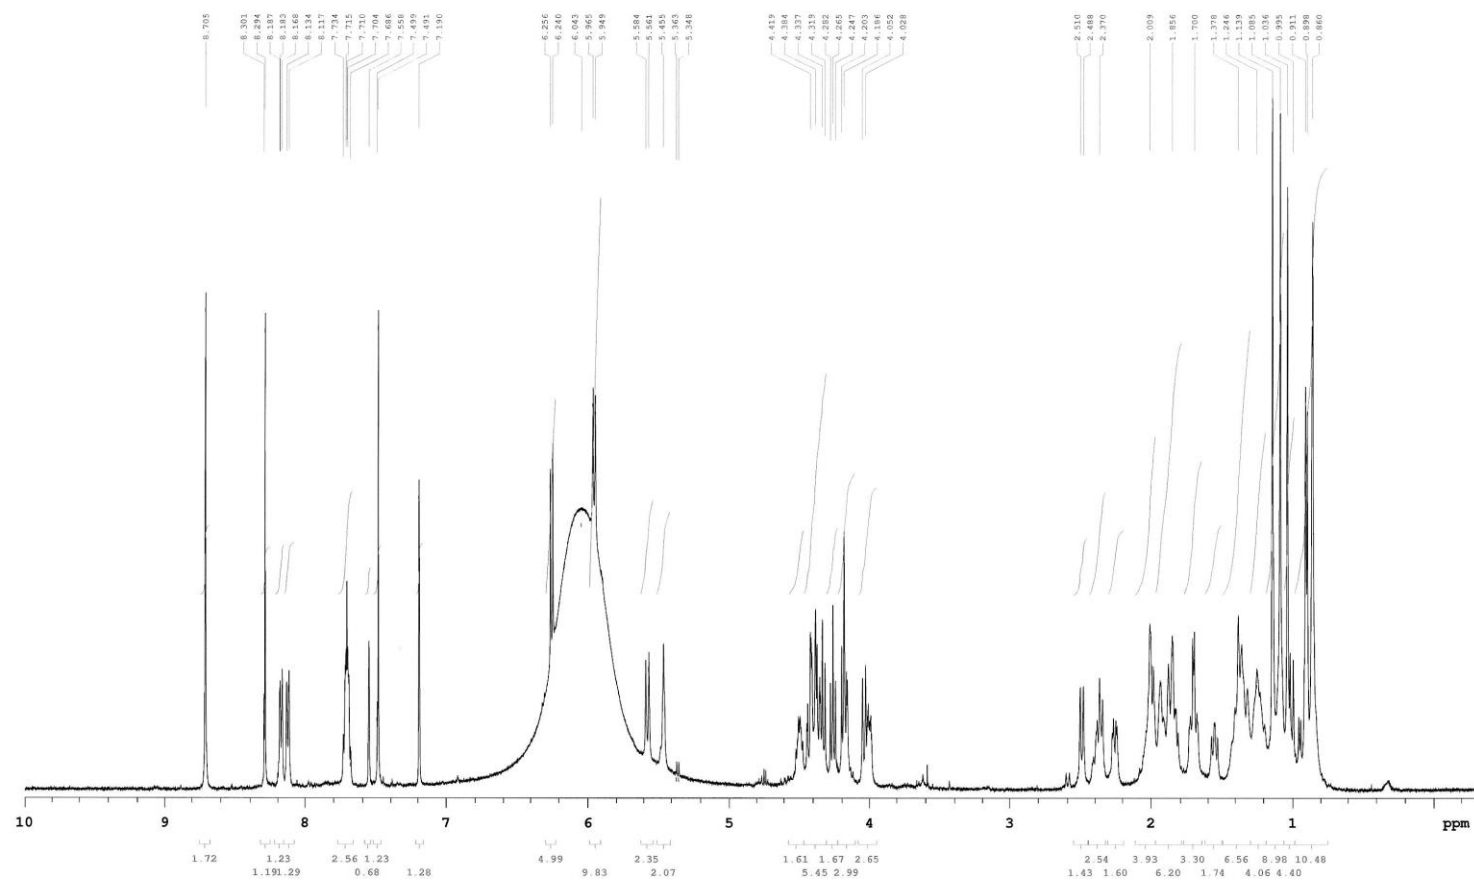

Figure S6.  $^1\text{H}$  NMR spectrum of **1u** (pyridine- $d_5$ , 500 MHz)

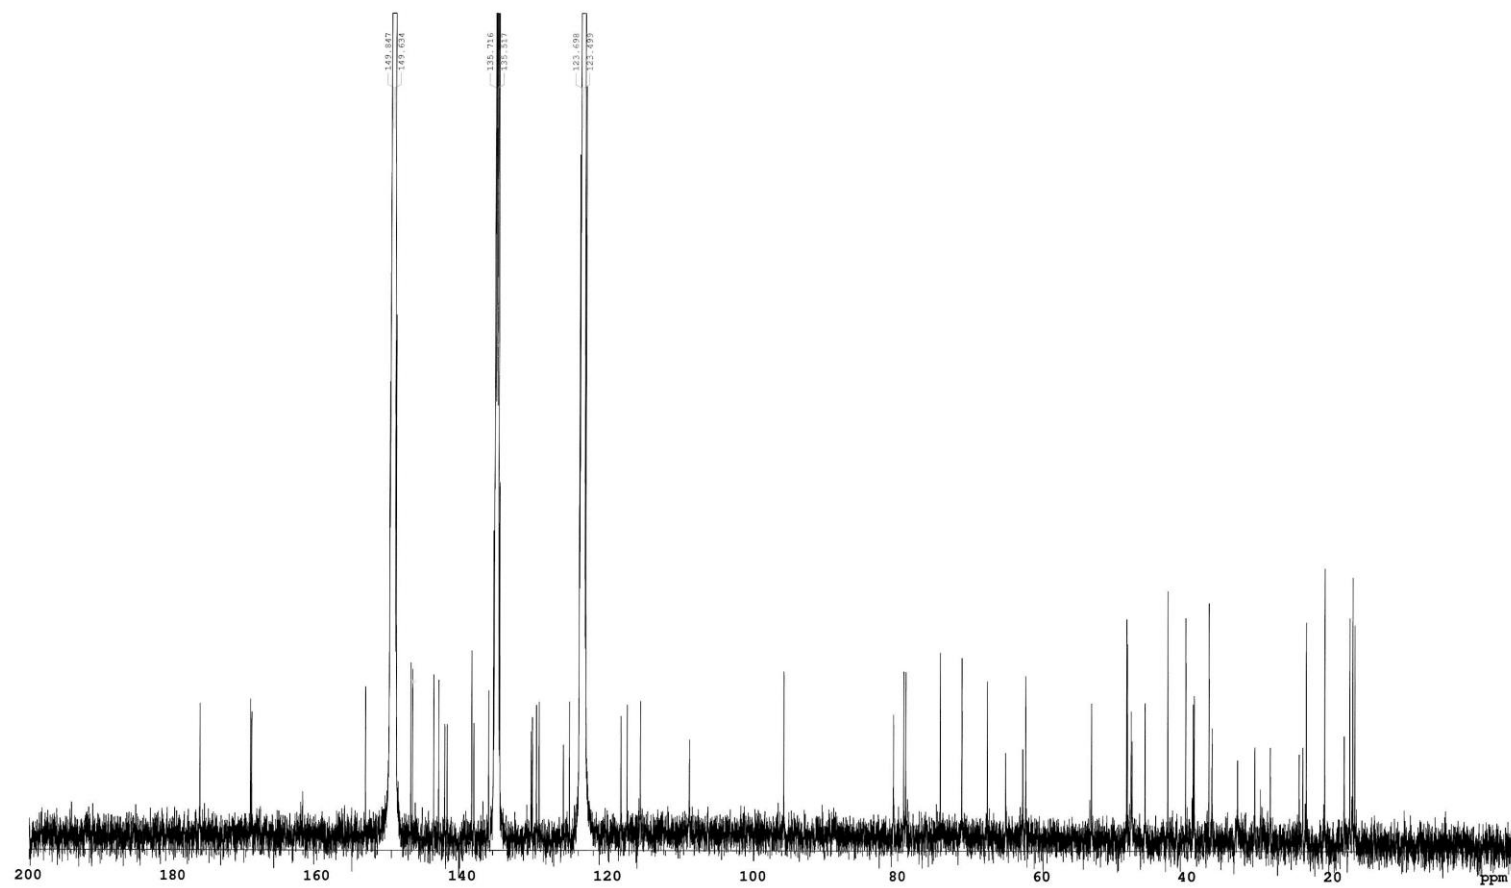

Figure S7.  $^{13}\text{C}$  NMR spectrum of **1u** (pyridine- $d_5$ , 126 MHz)

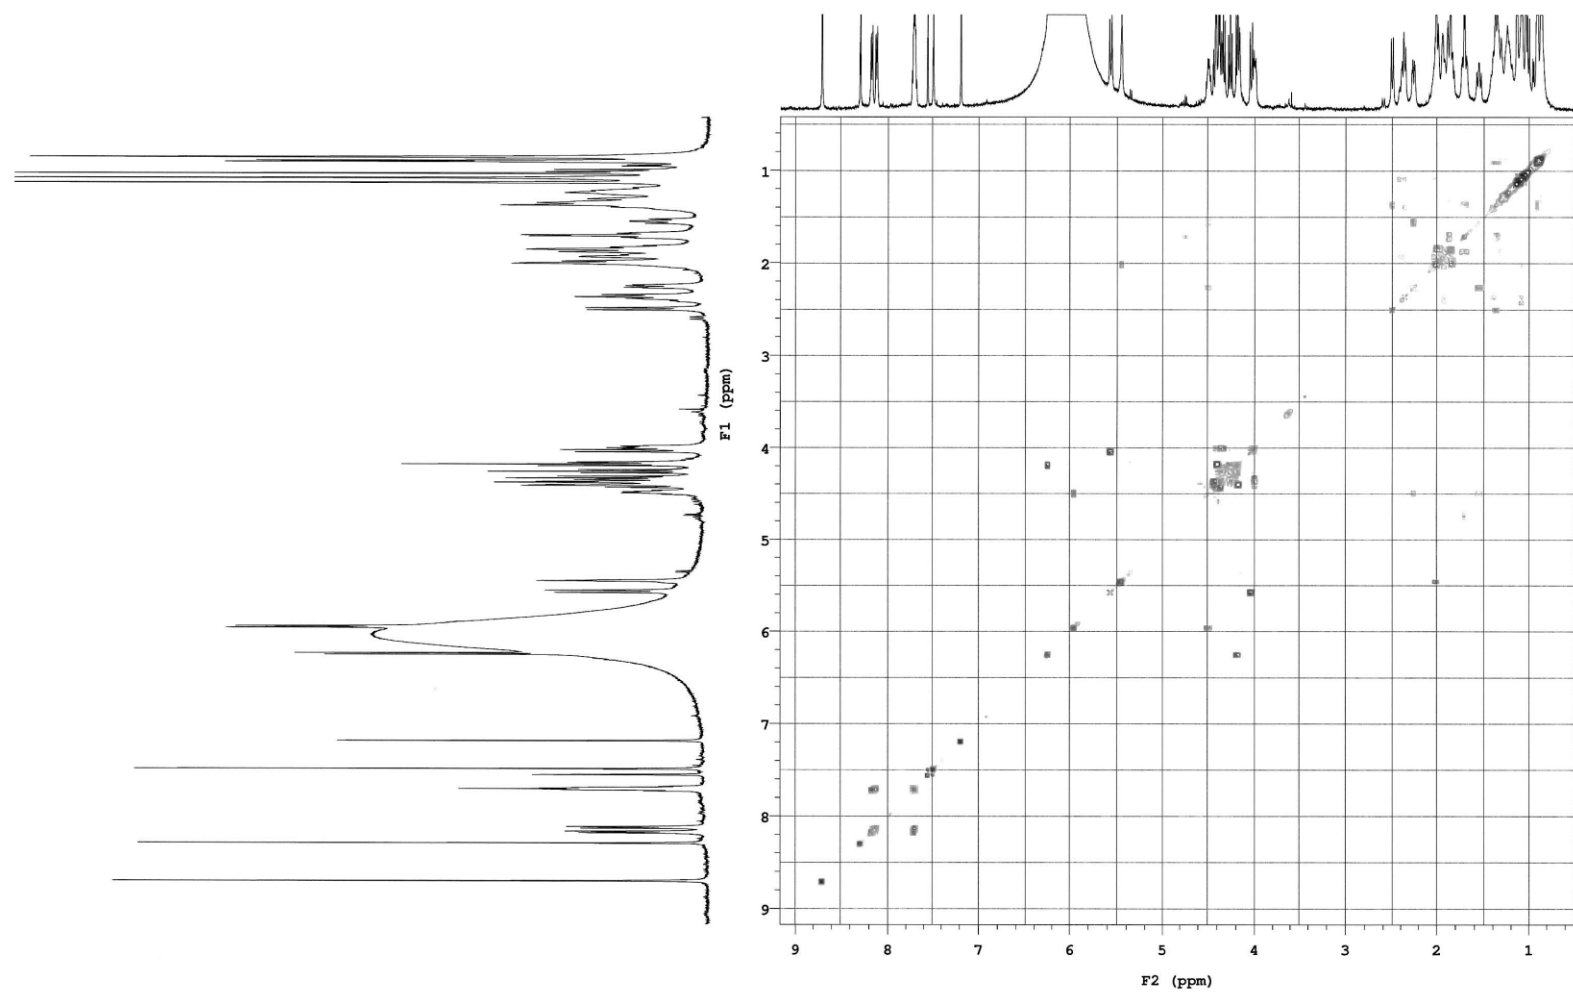

Figure S8.  $^1\text{H}$ - $^1\text{H}$  COSY spectrum of **1u** (pyridine- $d_5$ , 500 MHz)

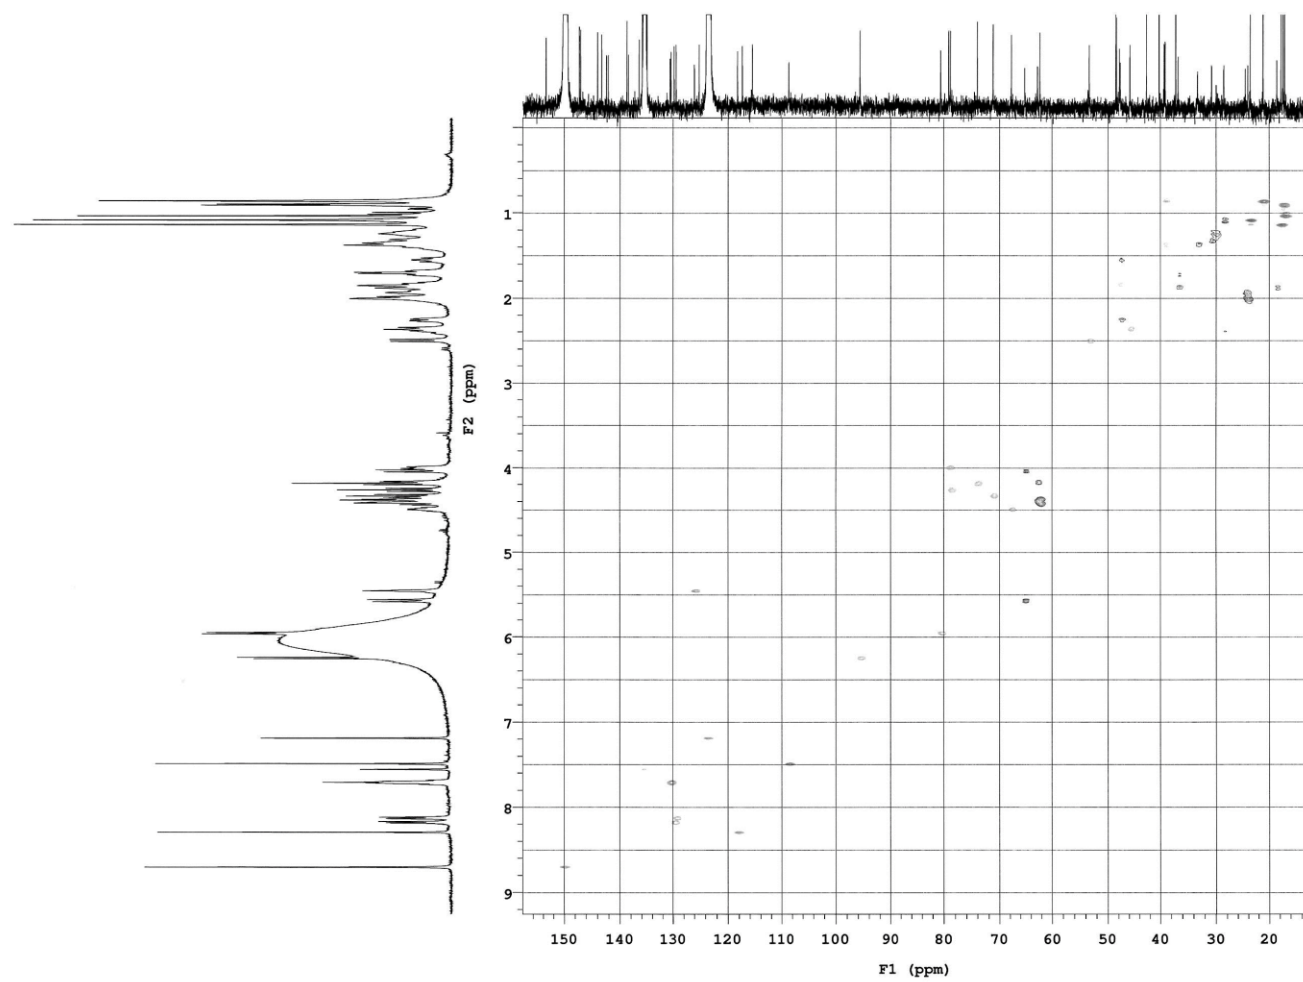

Figure S9. HSQC spectrum of **1u** (pyridine-*d*<sub>5</sub>)

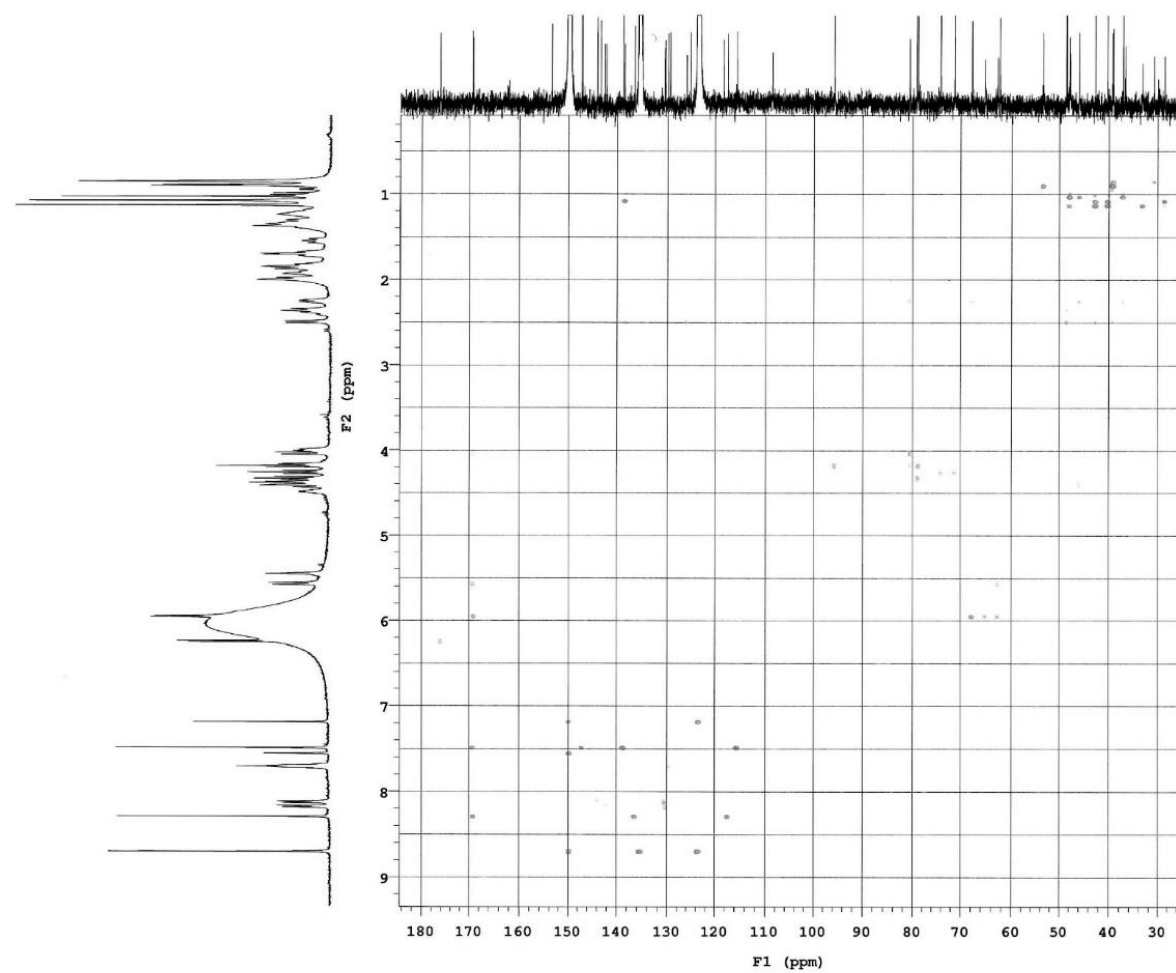

Figure S10. HMBC spectrum of **1u** ( $\text{pyridine-}d_5$ , 500 MHz)

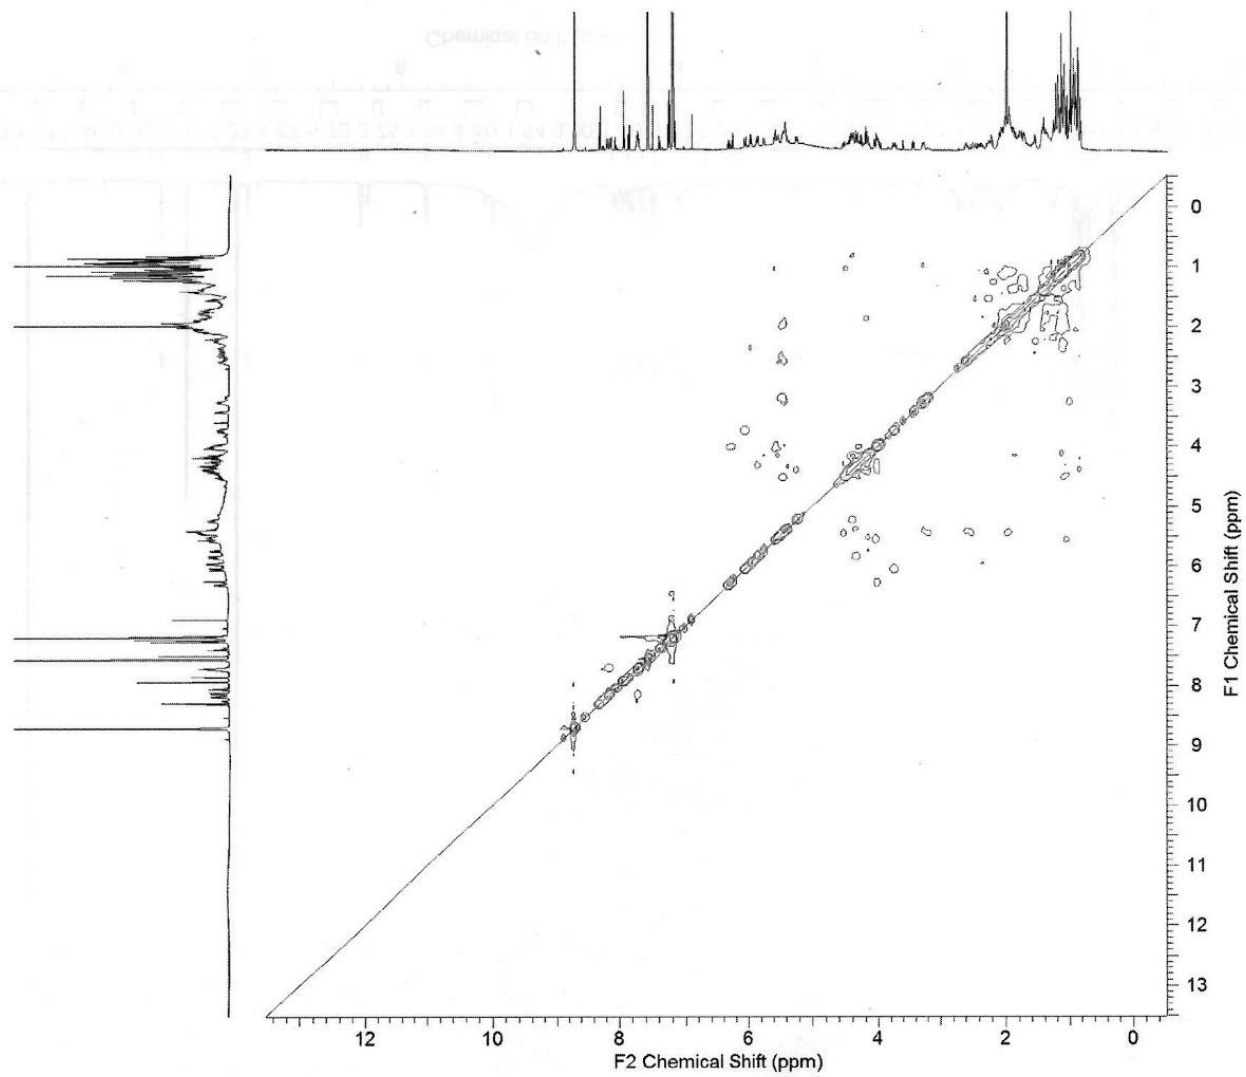

Figure S11. NOESY spectrum of **10,u** (pyridine- $d_5$ , 500 MHz)



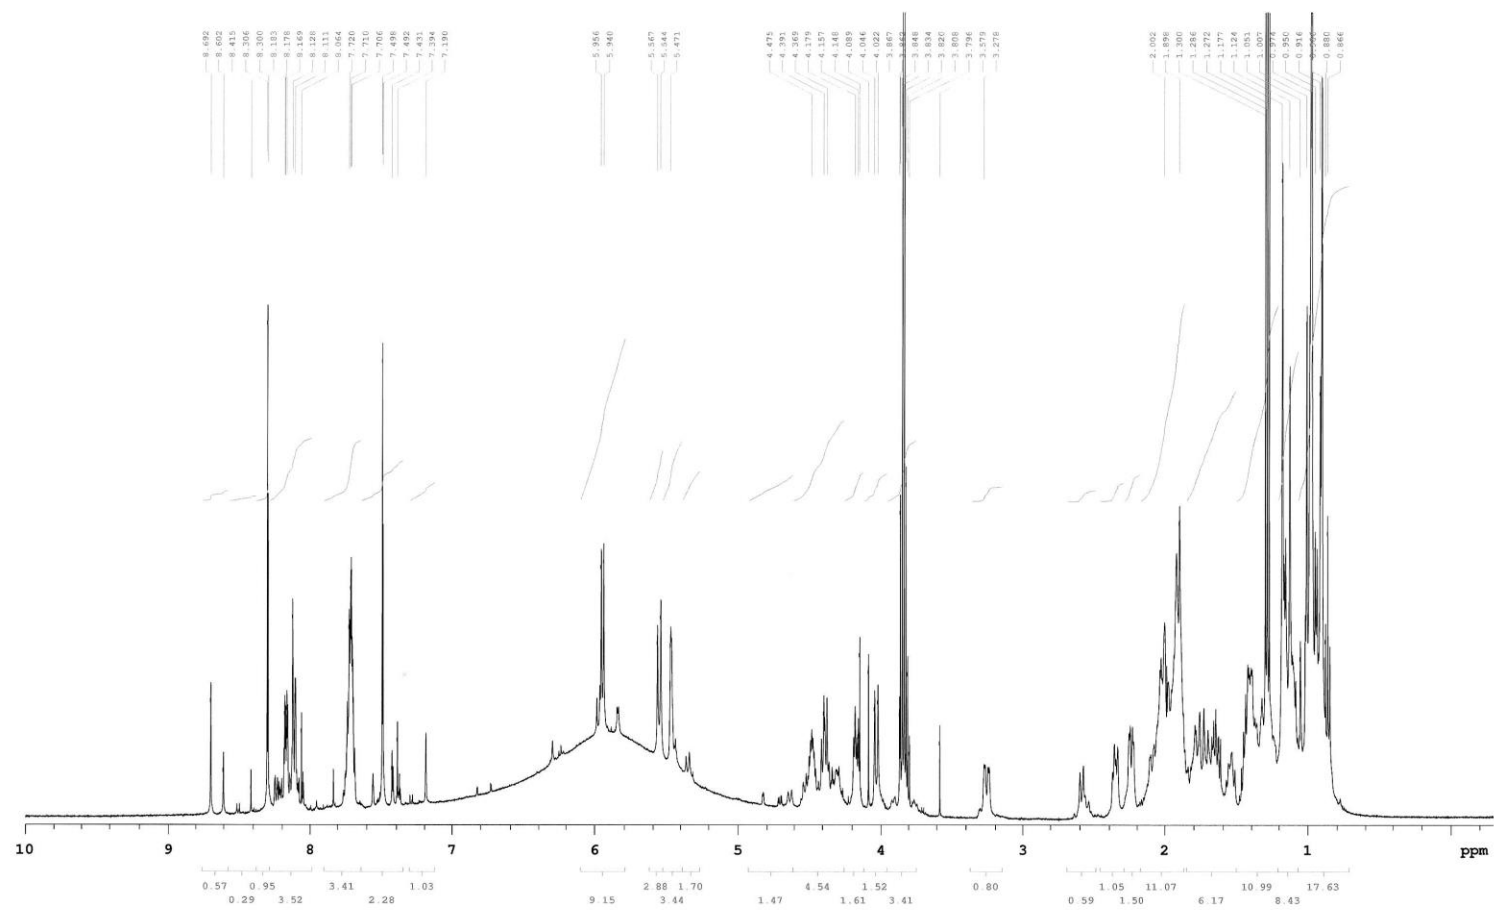

Figure S12.  $^1\text{H}$  NMR spectrum of **2** (pyridine- $d_5$ , 500 MHz)

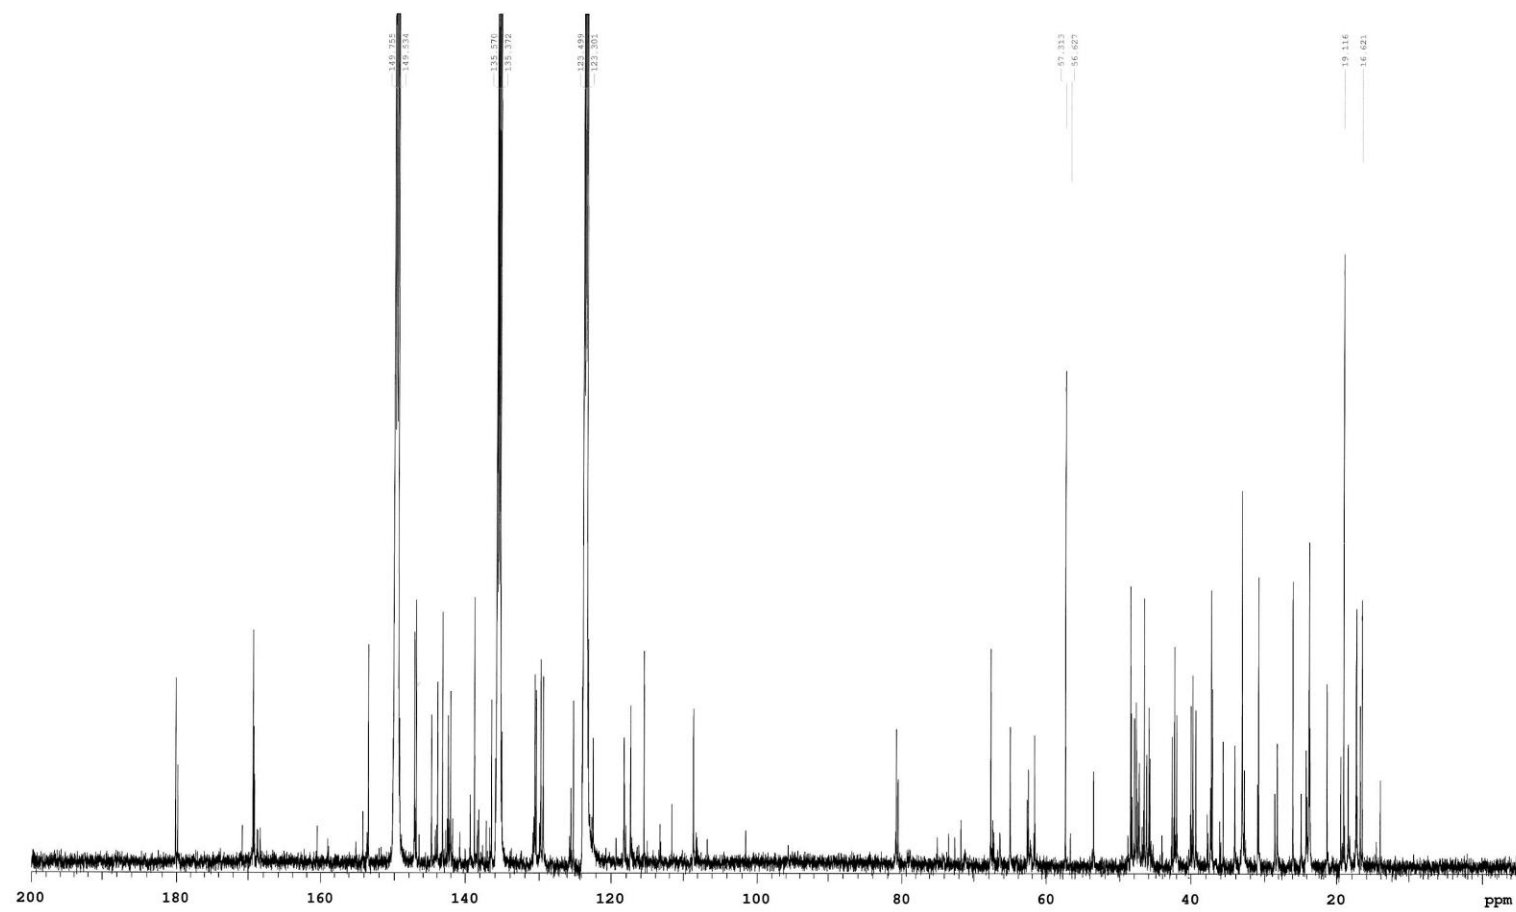

Figure S13.  $^{13}\text{C}$  NMR spectrum of **2** (pyridine- $d_5$ , 126 MHz)

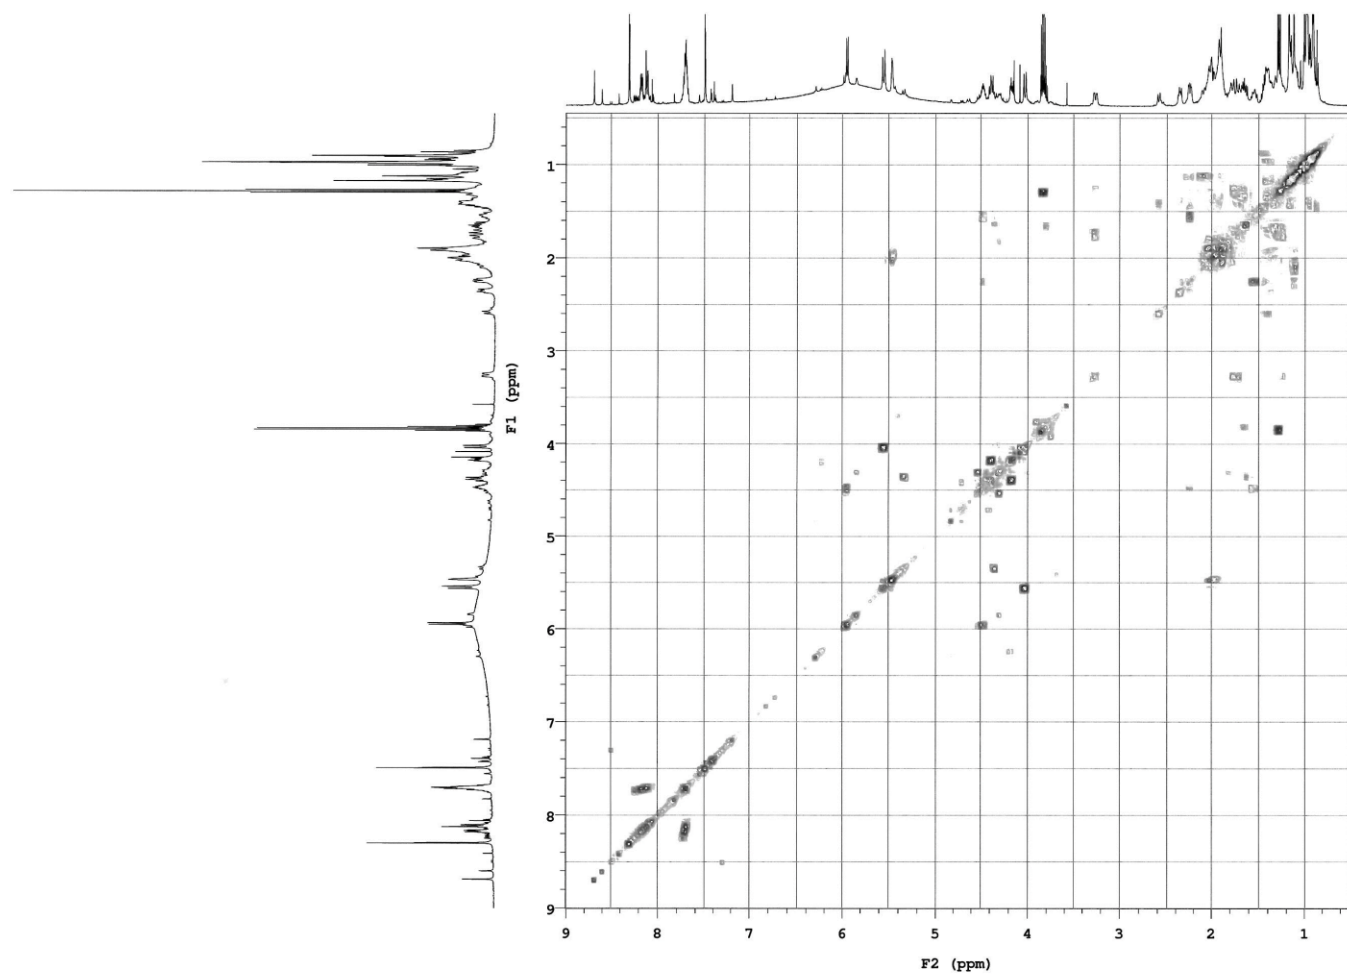

Figure S14.  $^1\text{H}$ - $^1\text{H}$  COSY spectrum of **2** (pyridine- $d_5$ , 500 MHz)

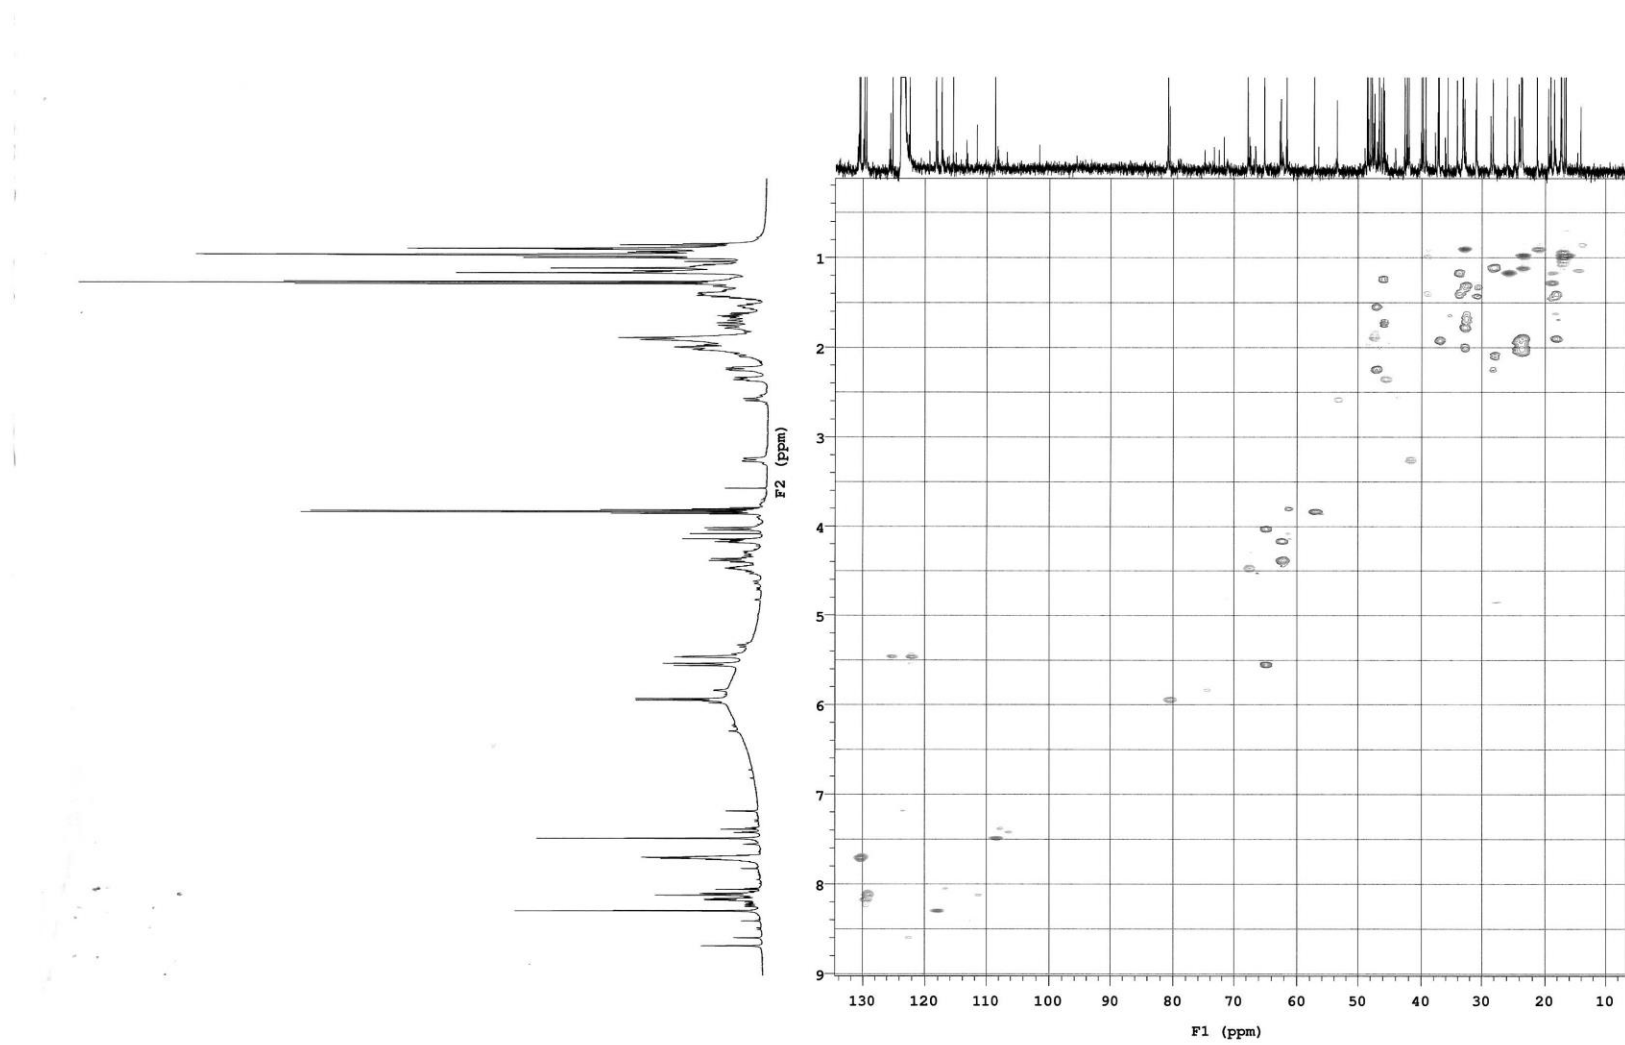

Figure S15. HSQC spectrum of **2** (pyridine-*d*<sub>5</sub>)

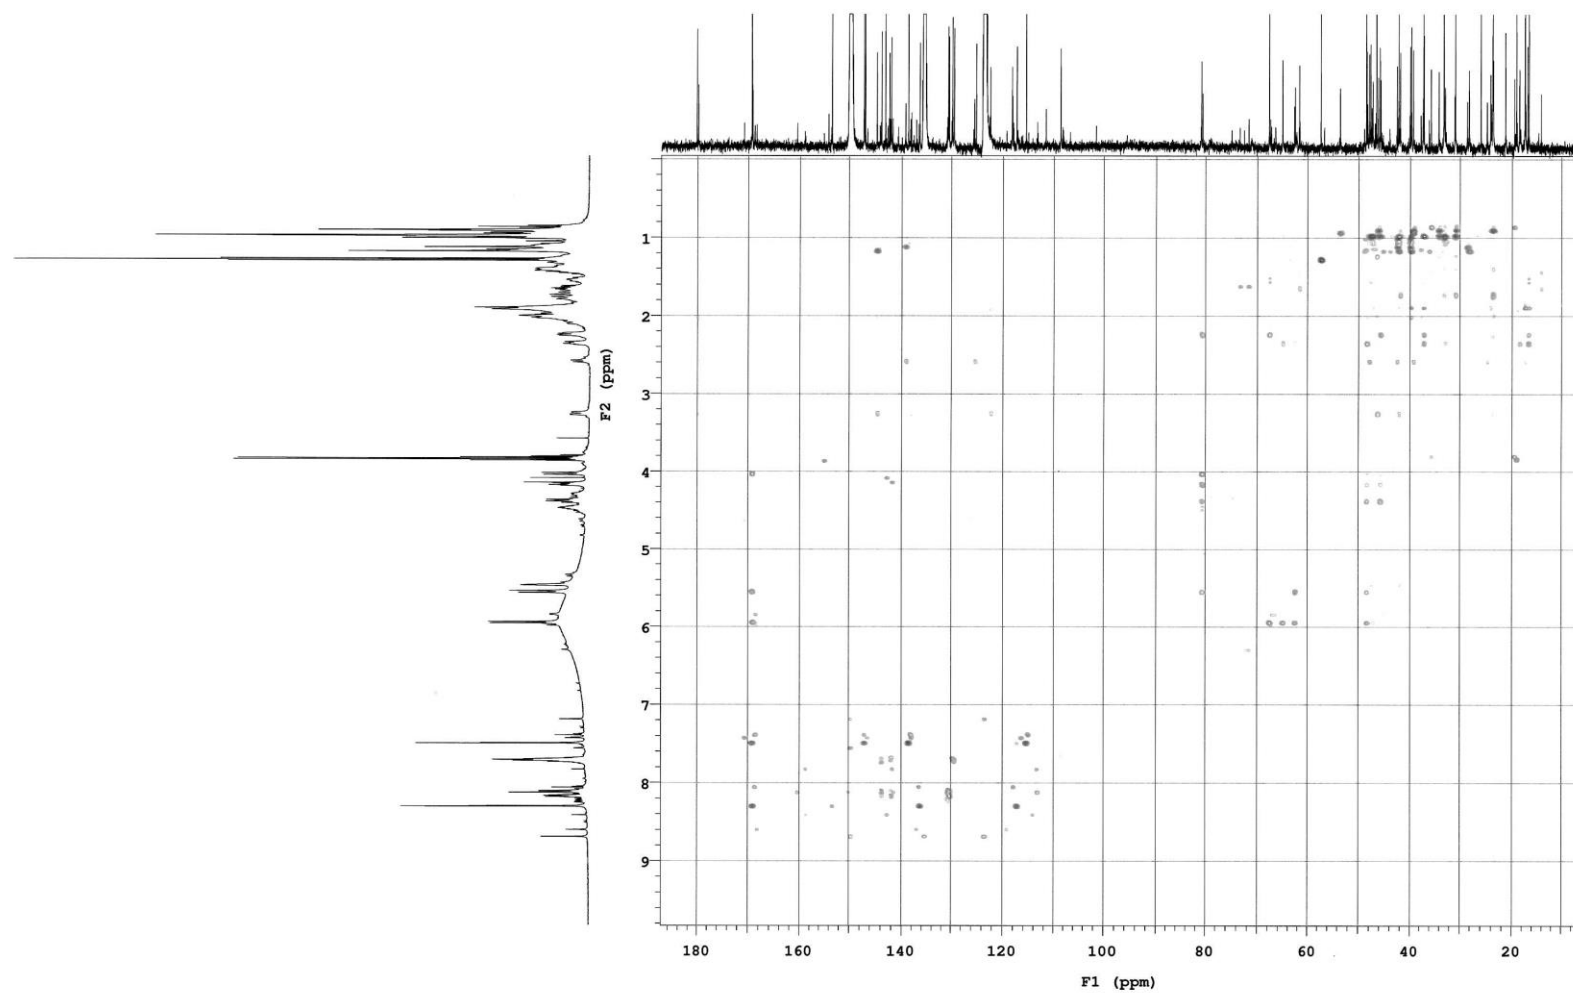

Figure S16. HMBC spectrum of **2** (pyridine- $d_5$ )

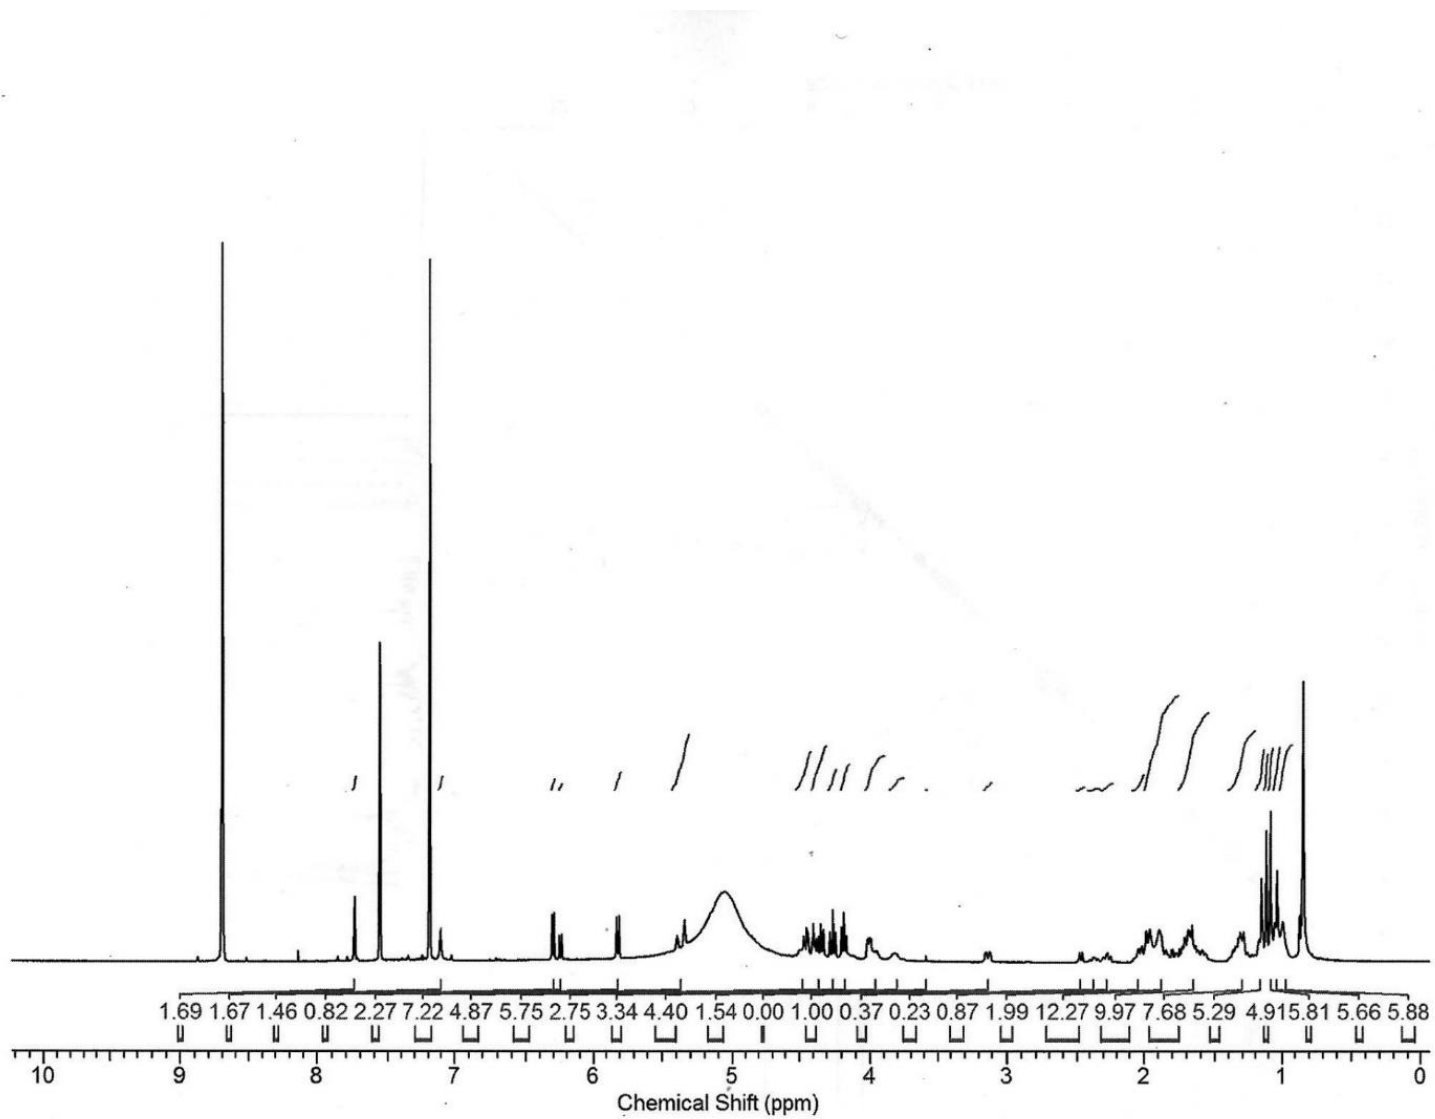

Figure S17.  $^1\text{H}$  NMR spectrum of **4** ( $\text{pyridine-}d_5$ , 500 MHz)

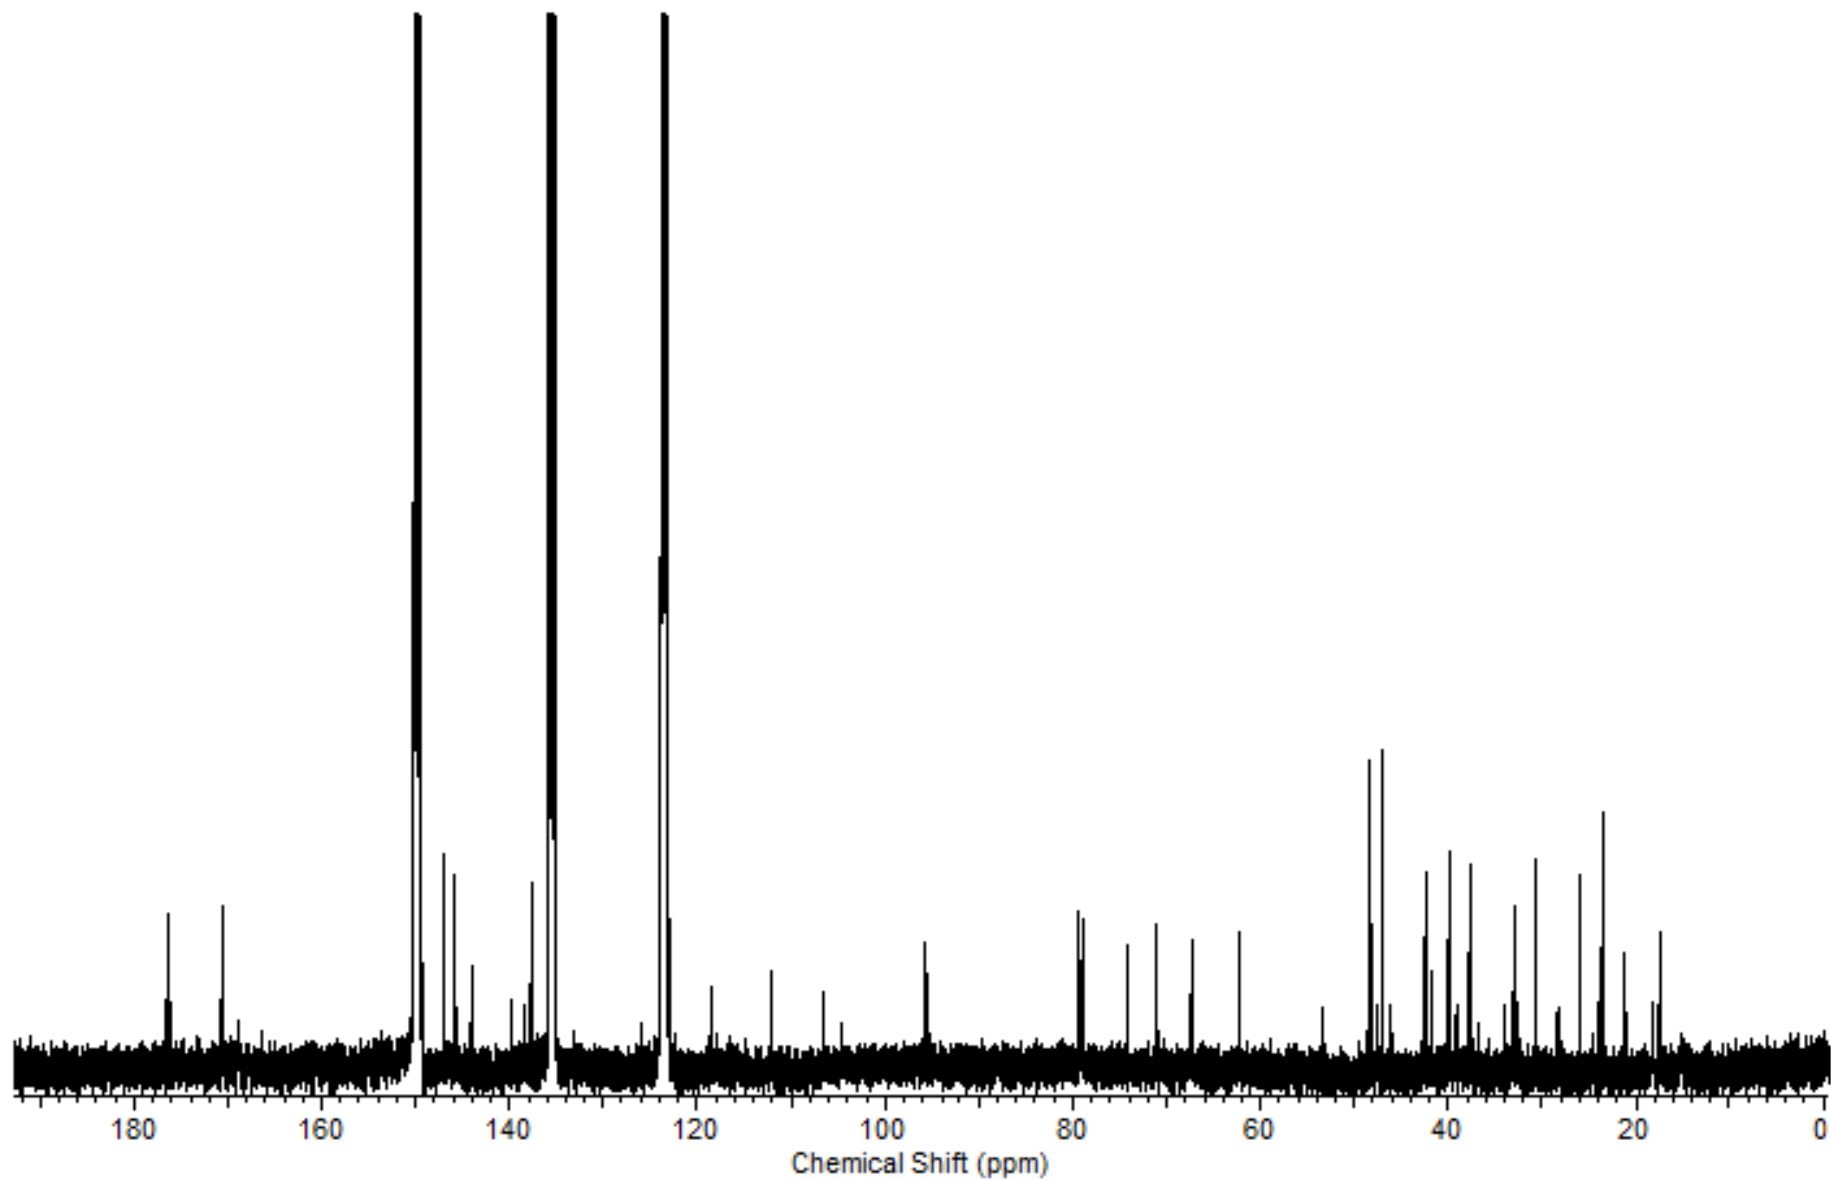

Figure S18.  $^{13}\text{C}$  NMR spectrum of 4 (pyridine- $d_5$ , 126 MHz)

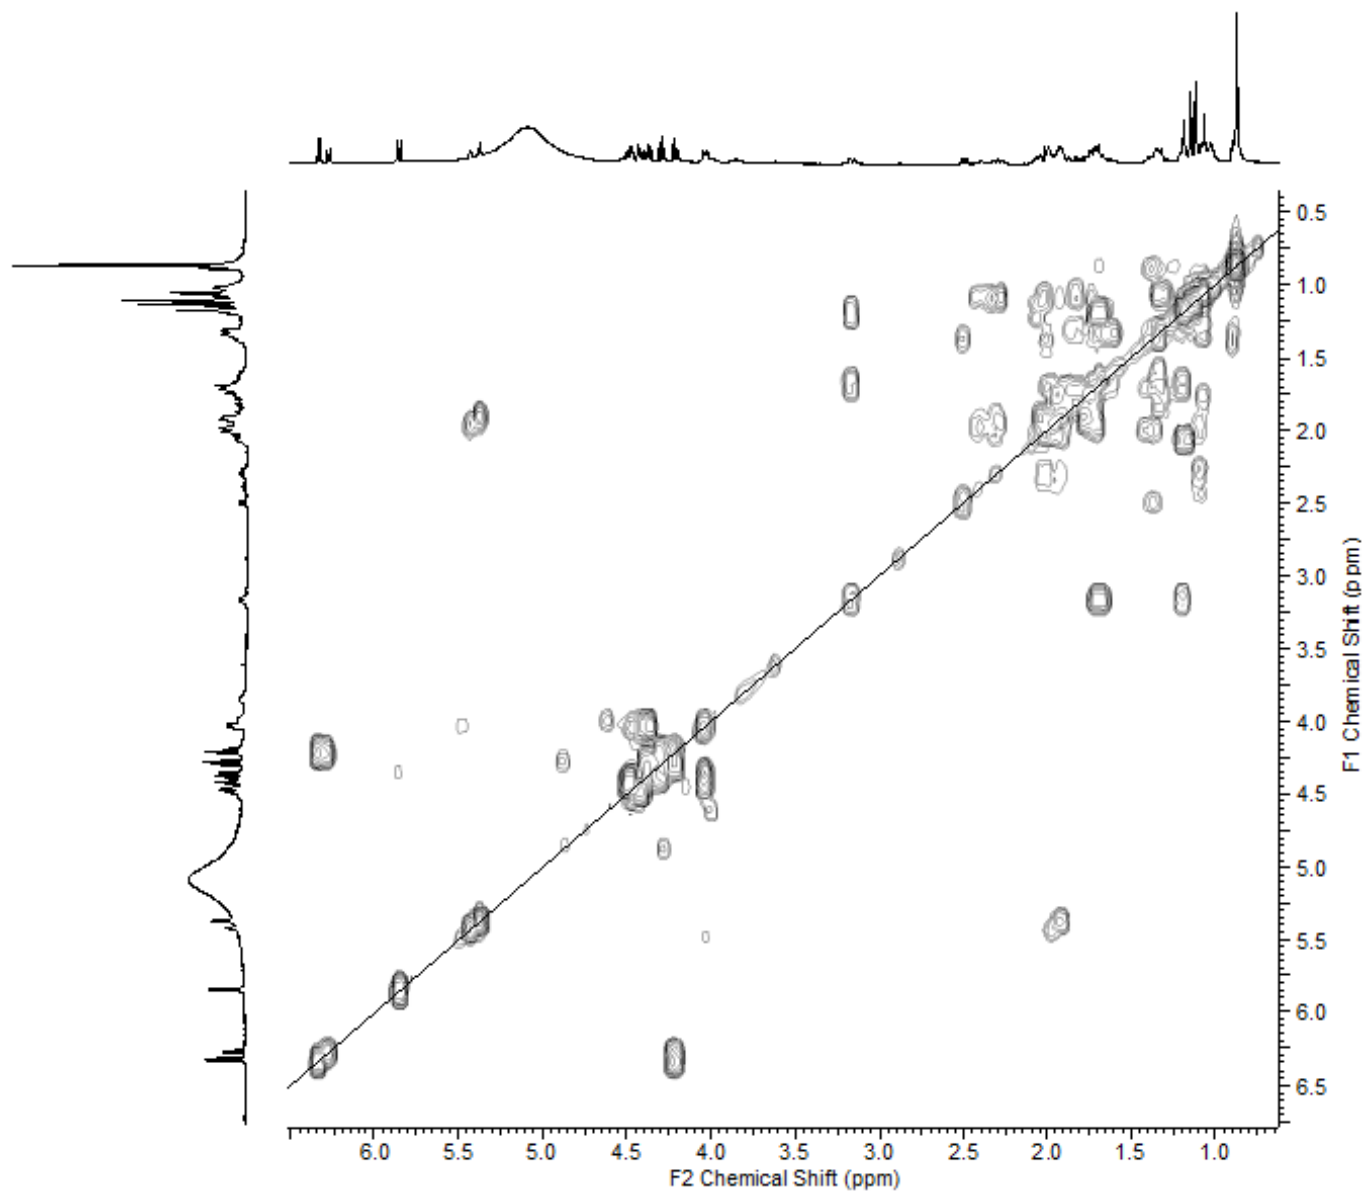

Figure S19.  $^1\text{H}$ - $^1\text{H}$  COSY spectrum of **4** (pyridine- $d_5$ , 500 MHz)



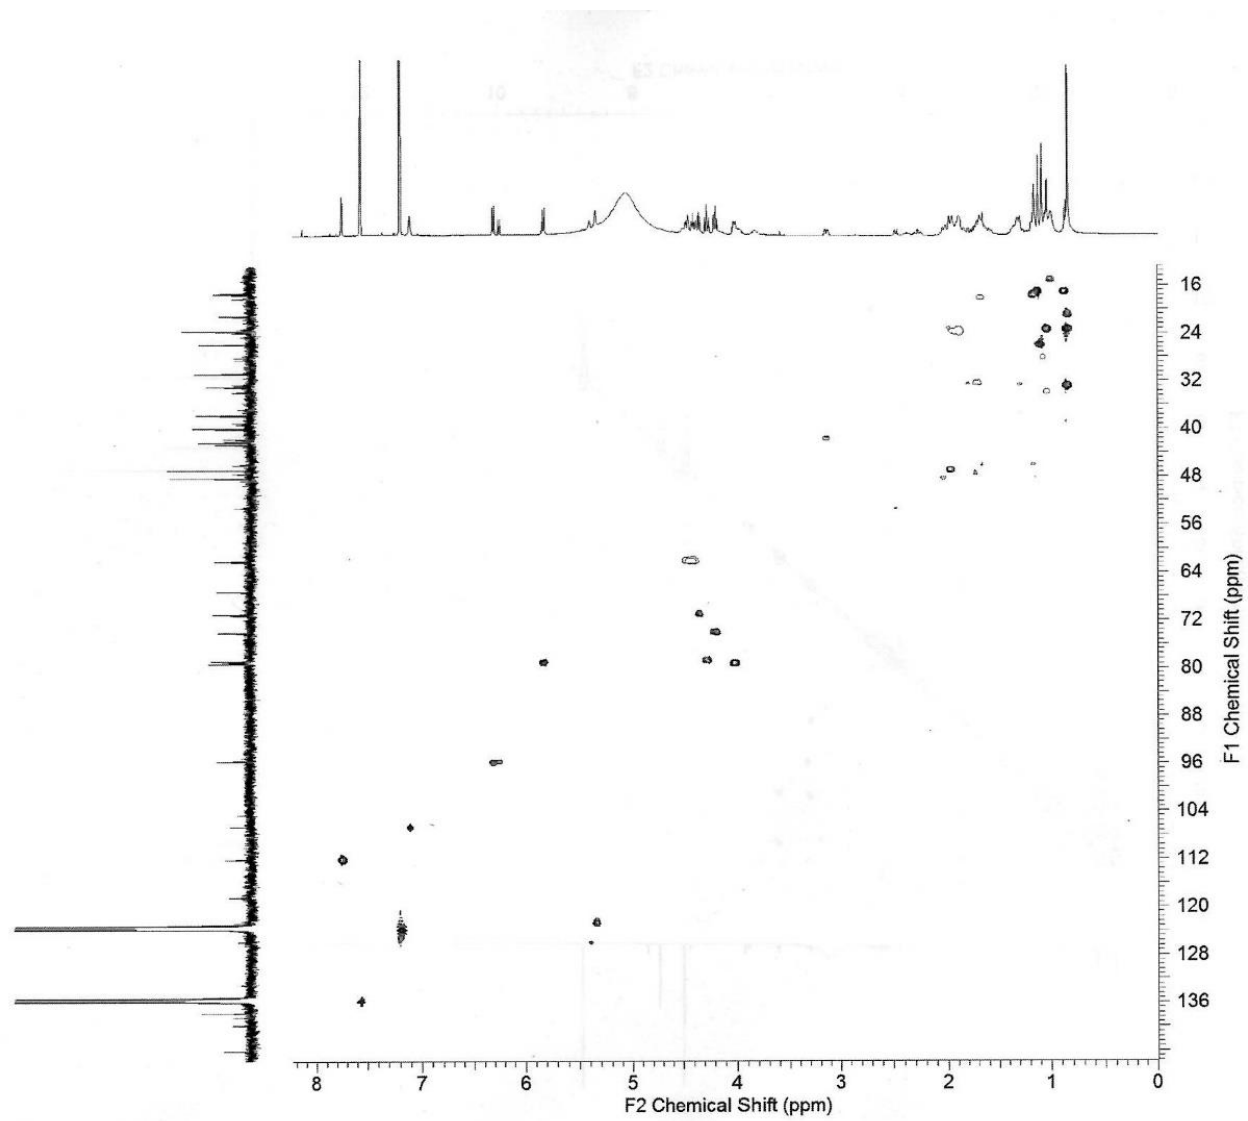

Figure S20. HSQC spectrum of 4 (pyridine-*d*<sub>5</sub>)

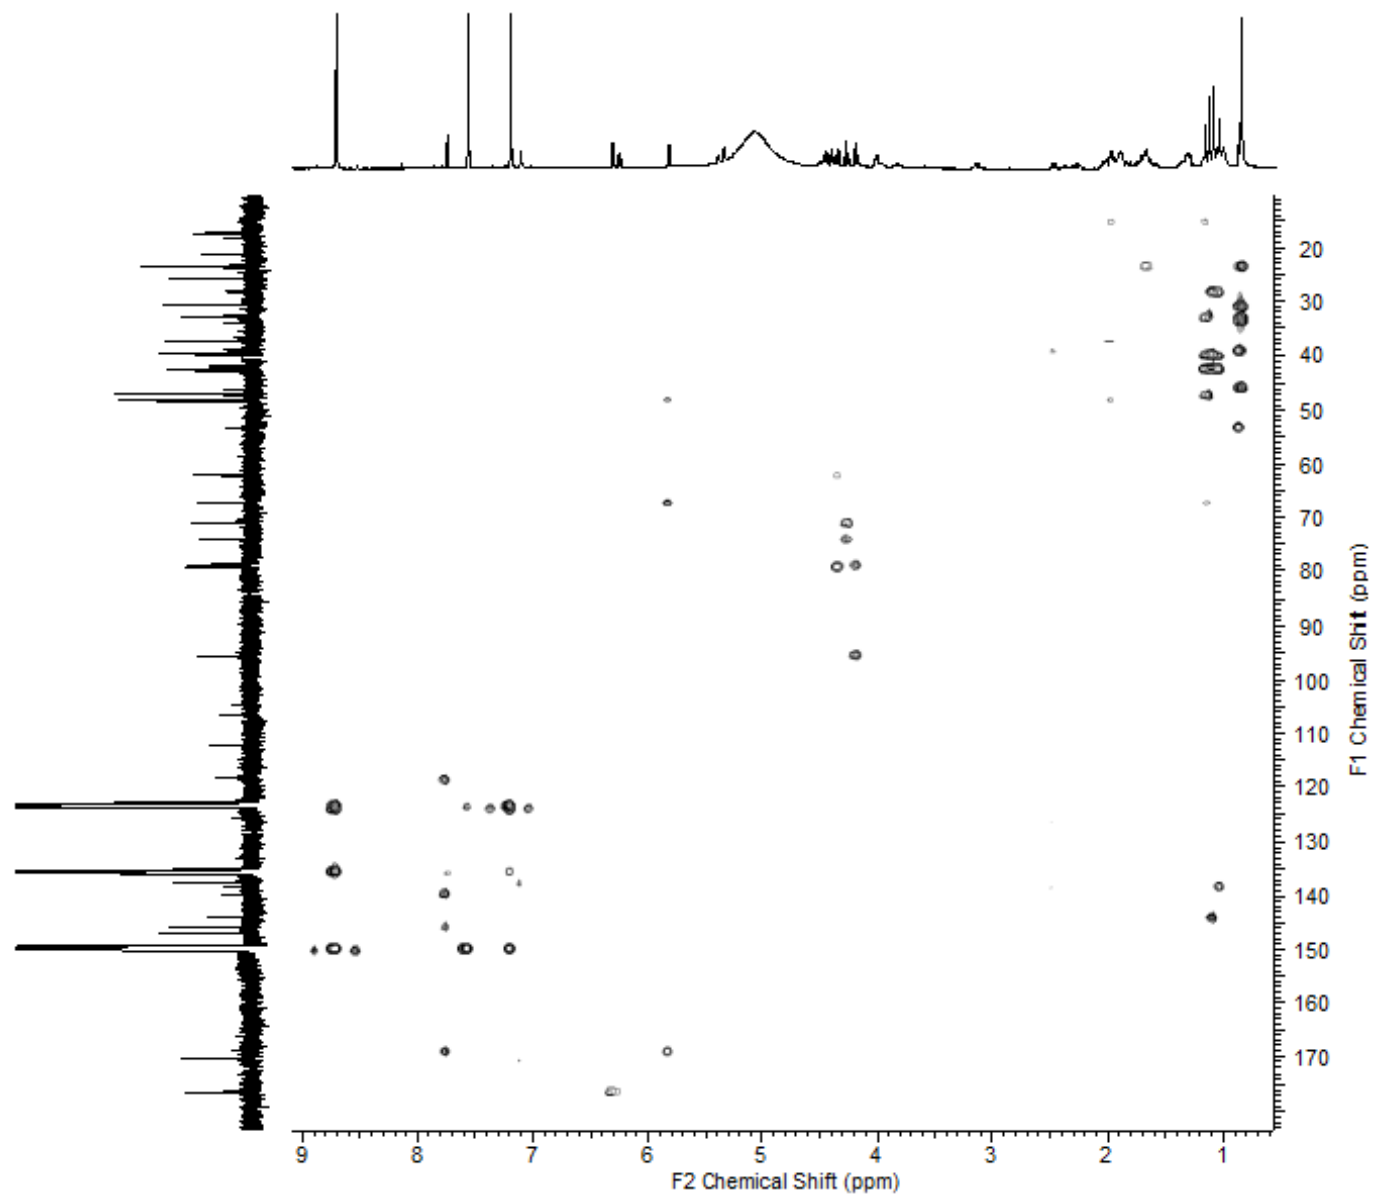

Figure S21. HMBC spectrum of **4** (pyridine- $d_5$ )

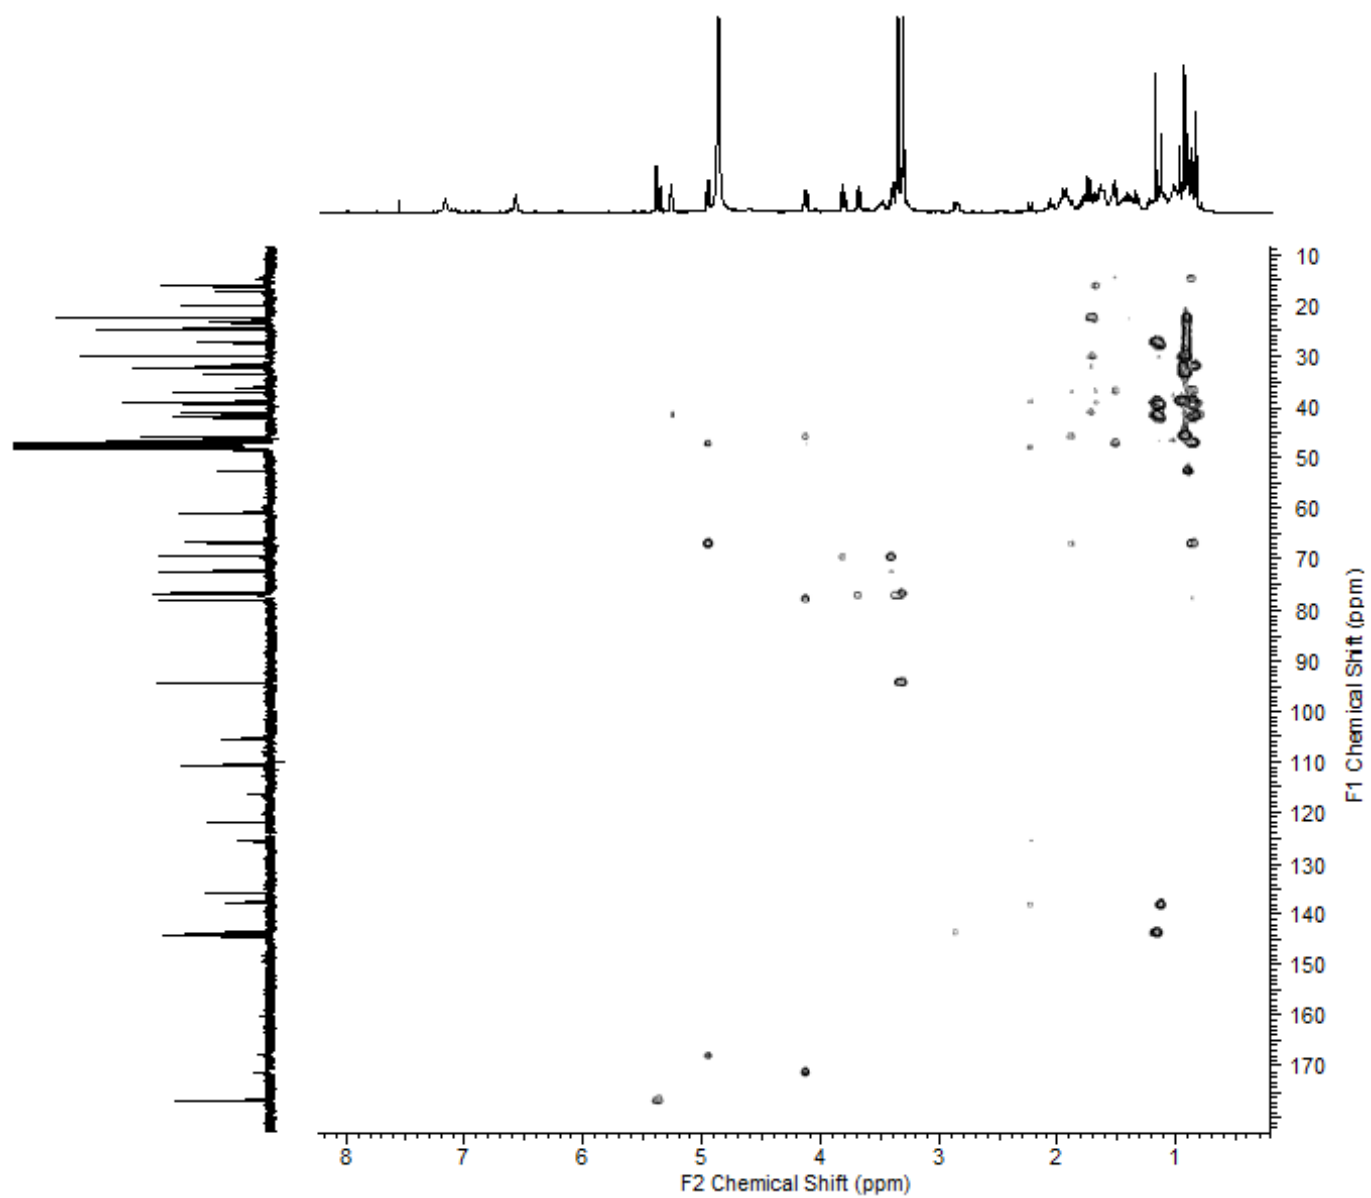

Figure S22. HMBC spectrum of **4** (CD<sub>3</sub>OD, 500 MHz)

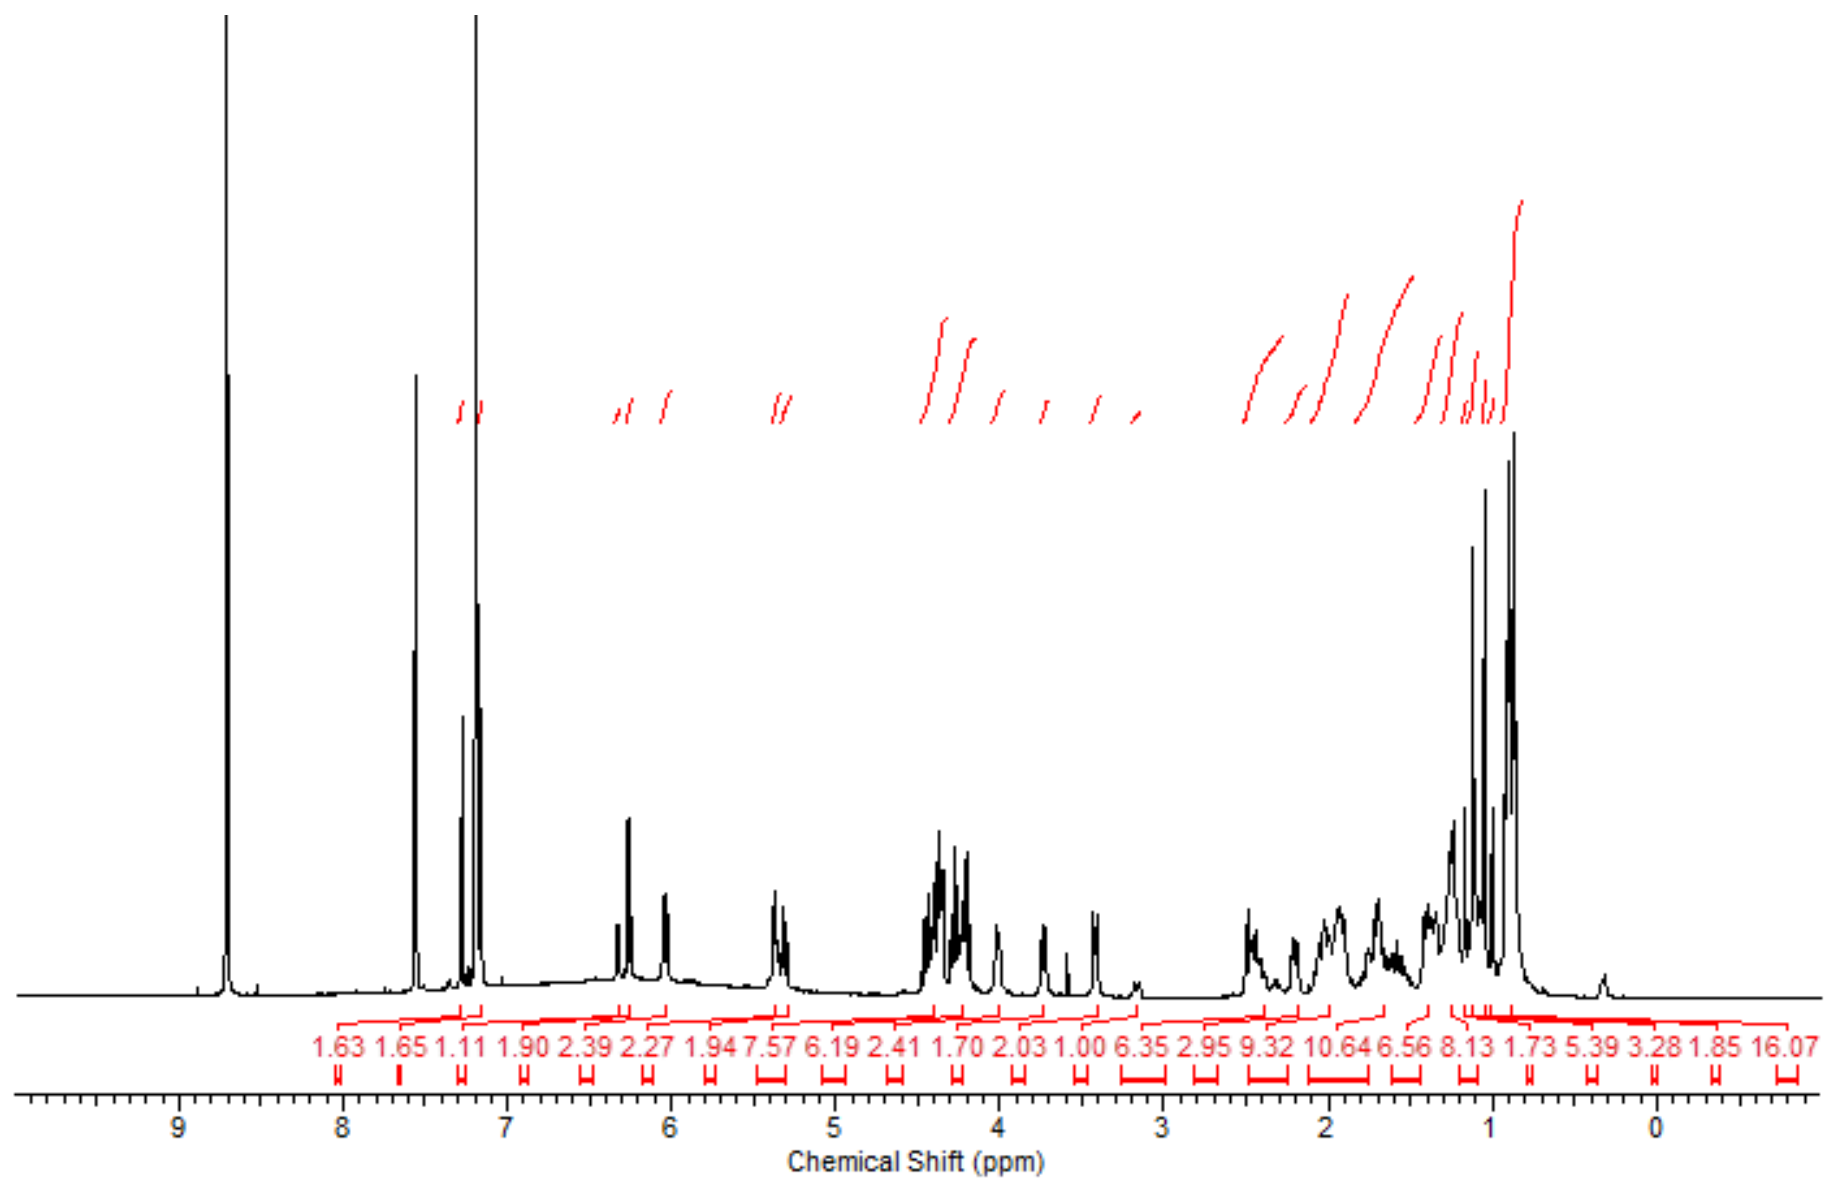

Figure S23.  $^1\text{H}$  NMR spectrum of **9** (pyridine- $d_5$ , 500 MHz)

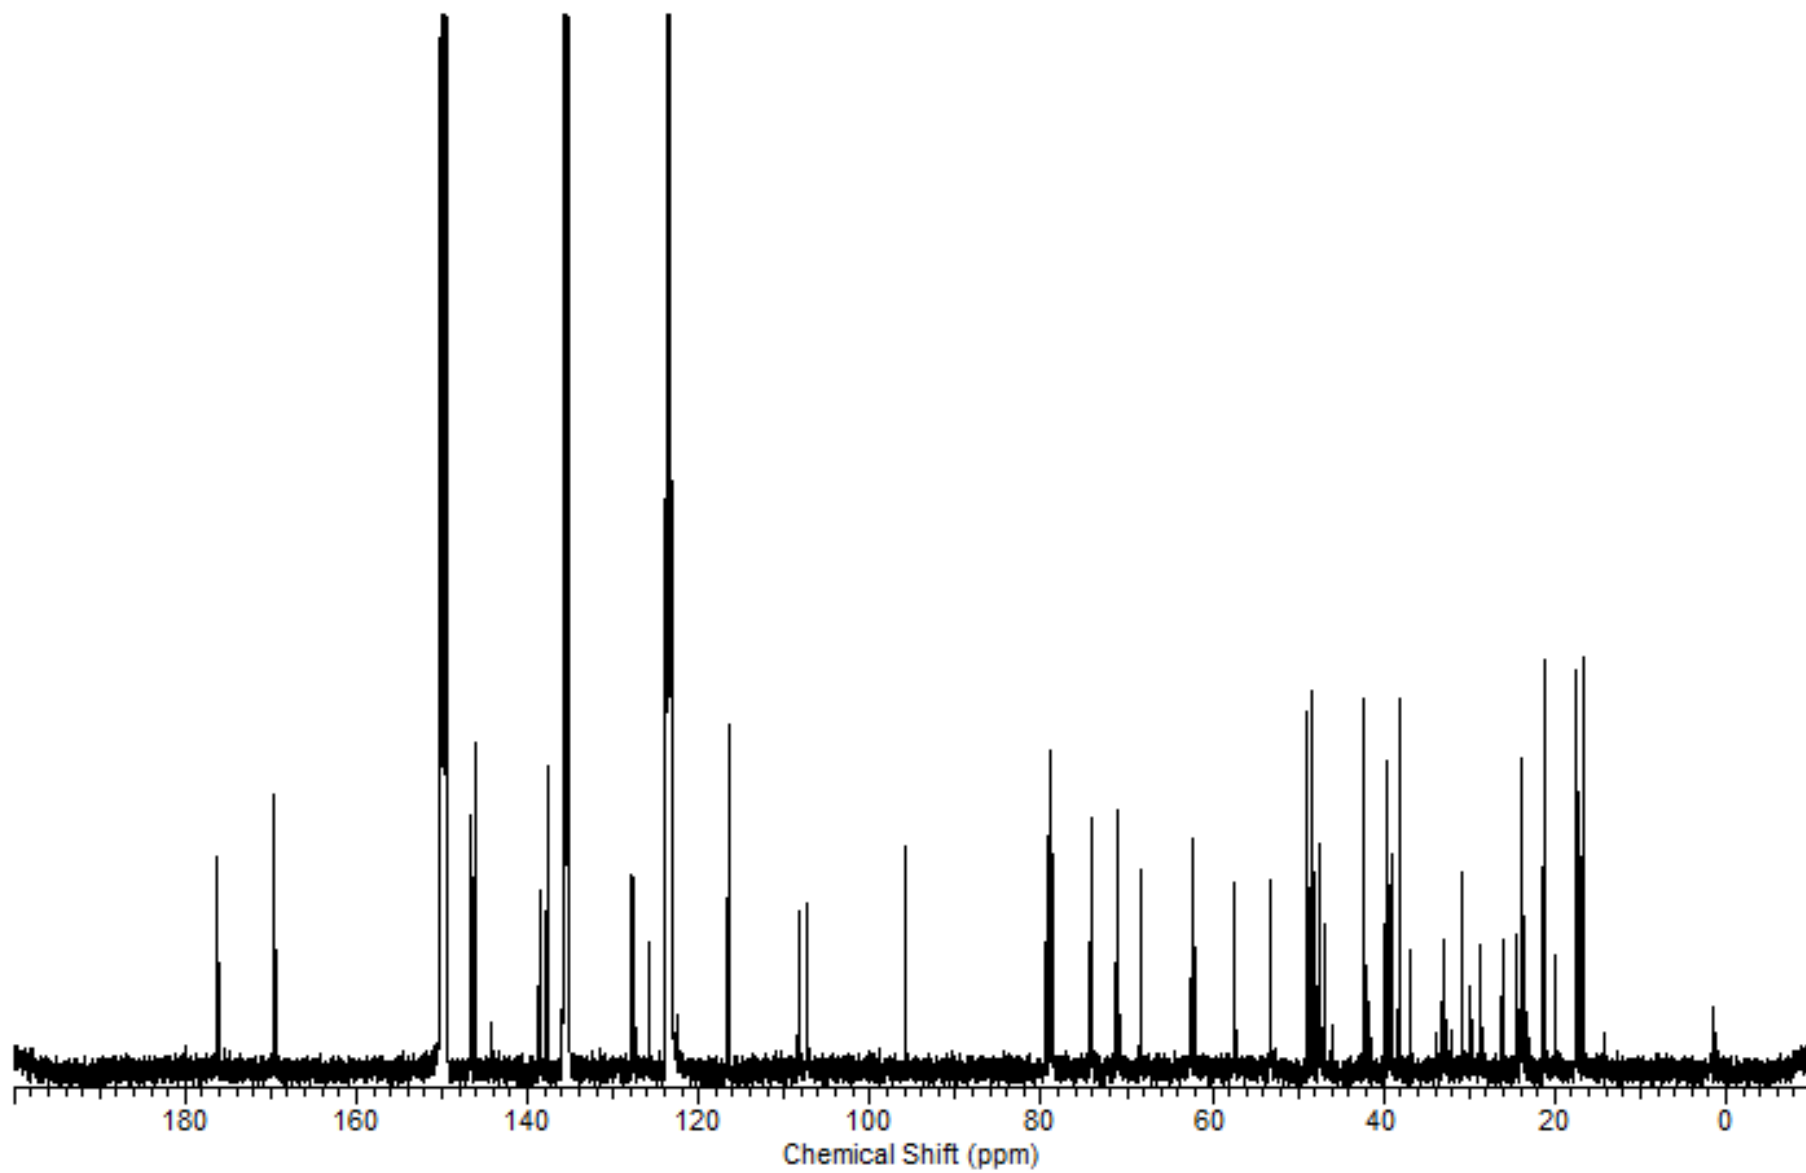

Figure S24.  $^{13}\text{C}$  NMR spectrum of **9** (pyridine- $d_5$ , 126 MHz)

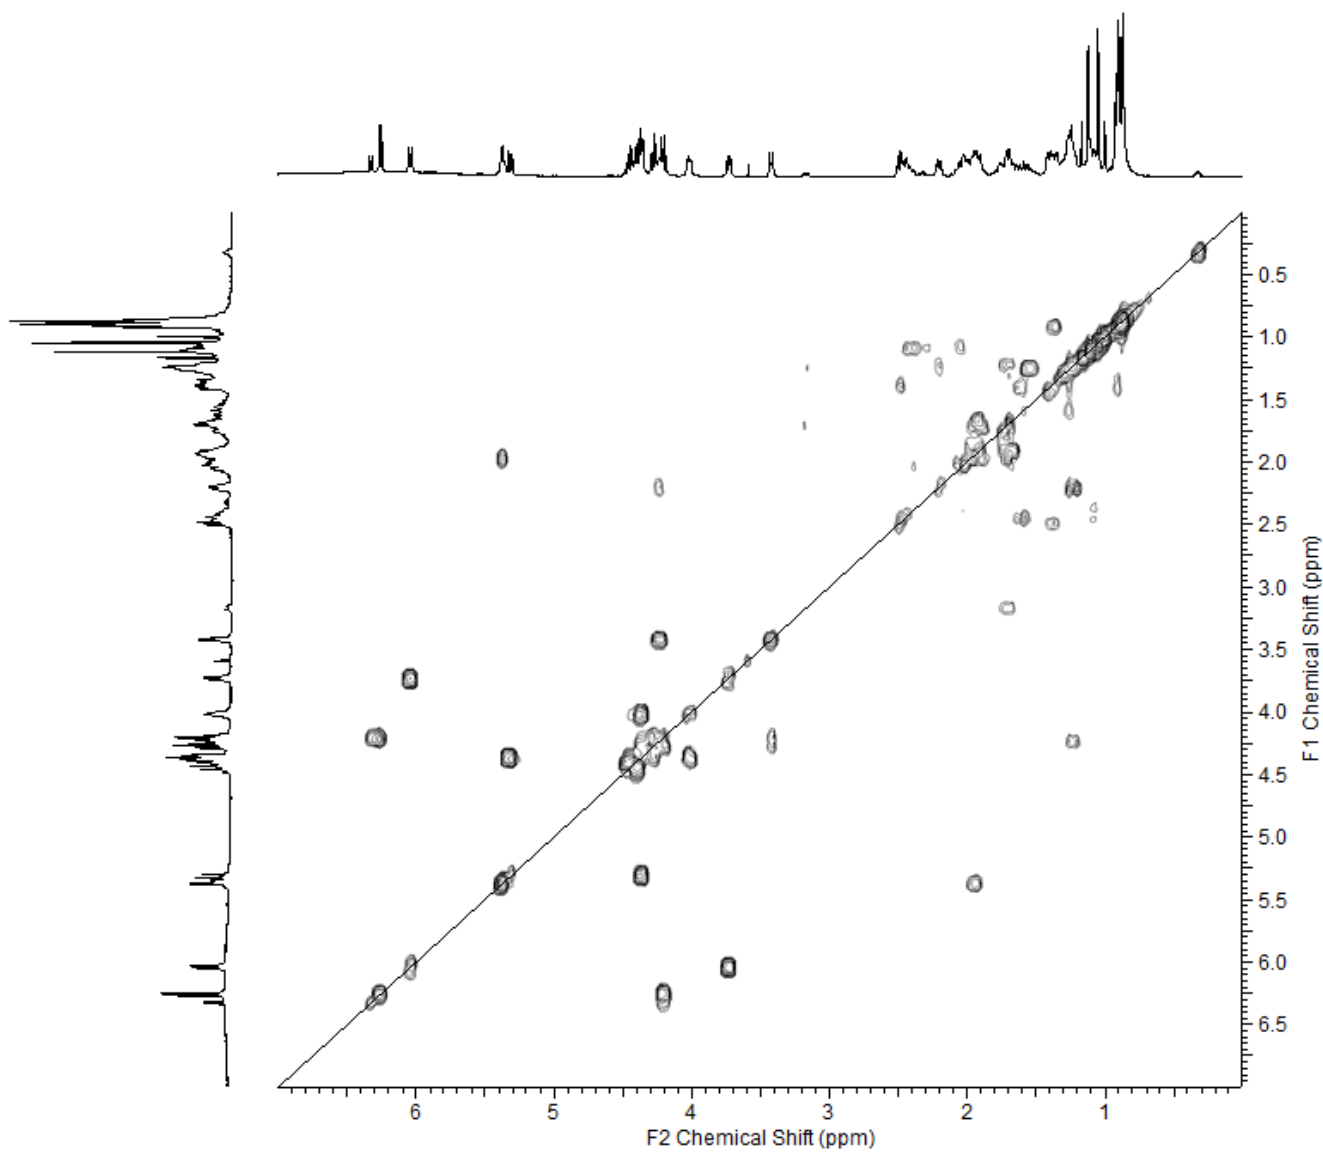

Figure S25.  $^1\text{H}$ - $^1\text{H}$  COSY spectrum of **9** (pyridine- $d_5$ , 500 MHz)

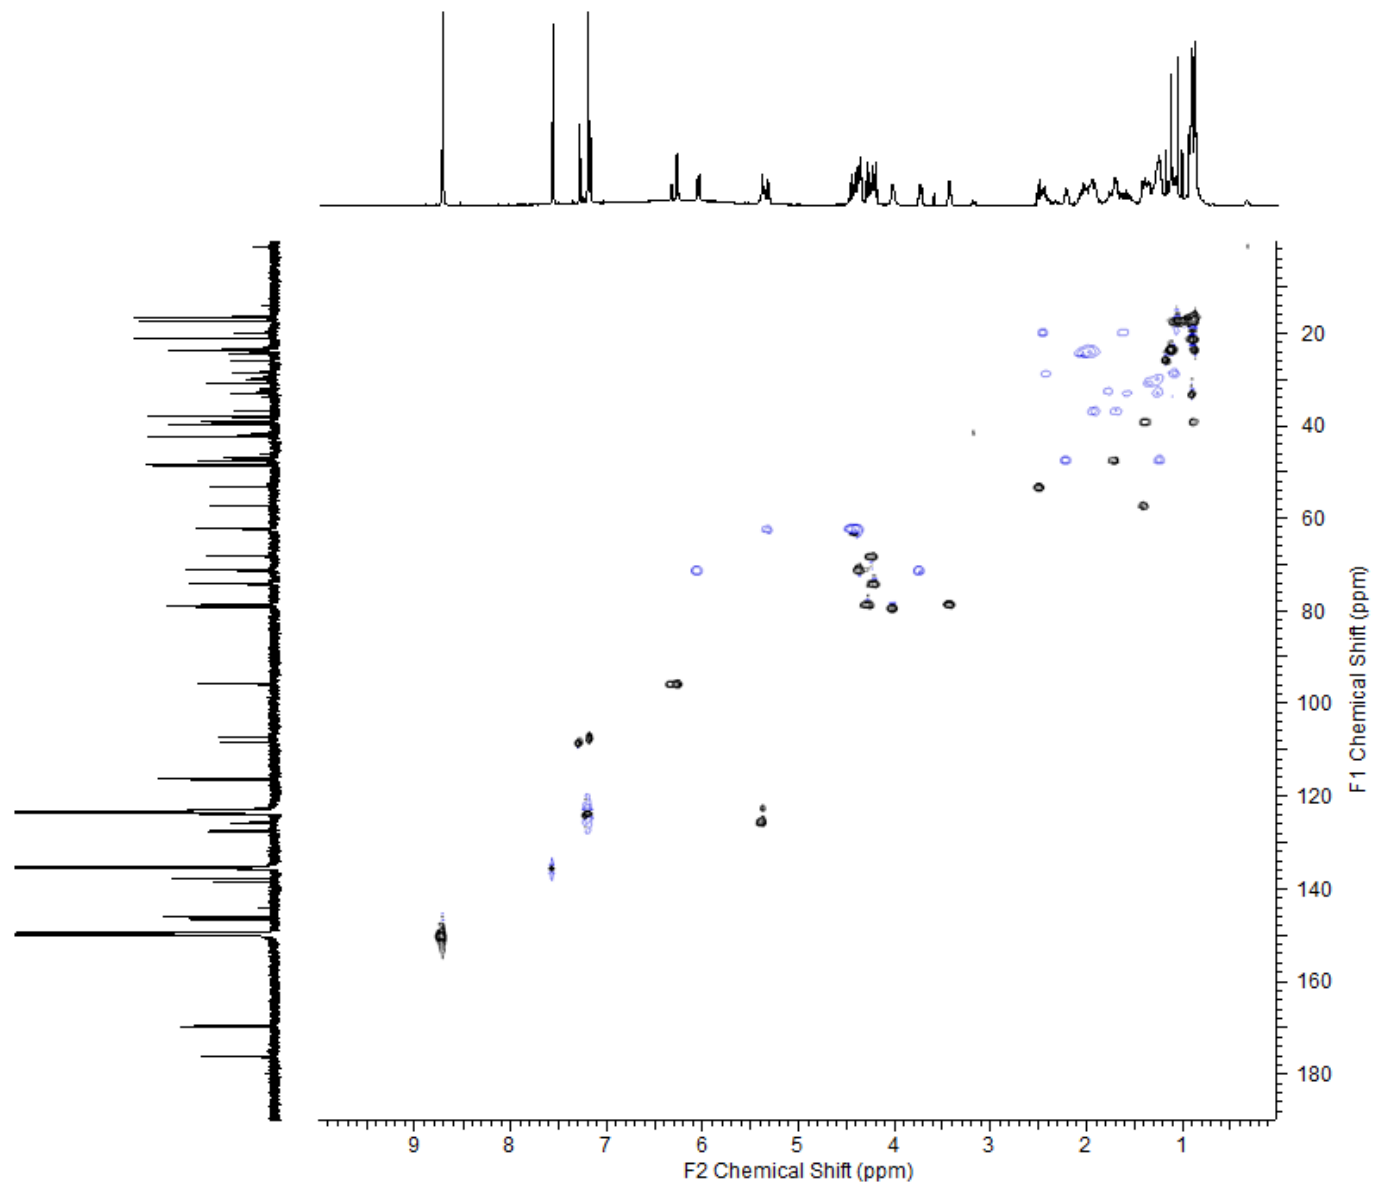

Figure S26. HSQC spectrum of **9** ( $\text{pyridine-}d_5$ )

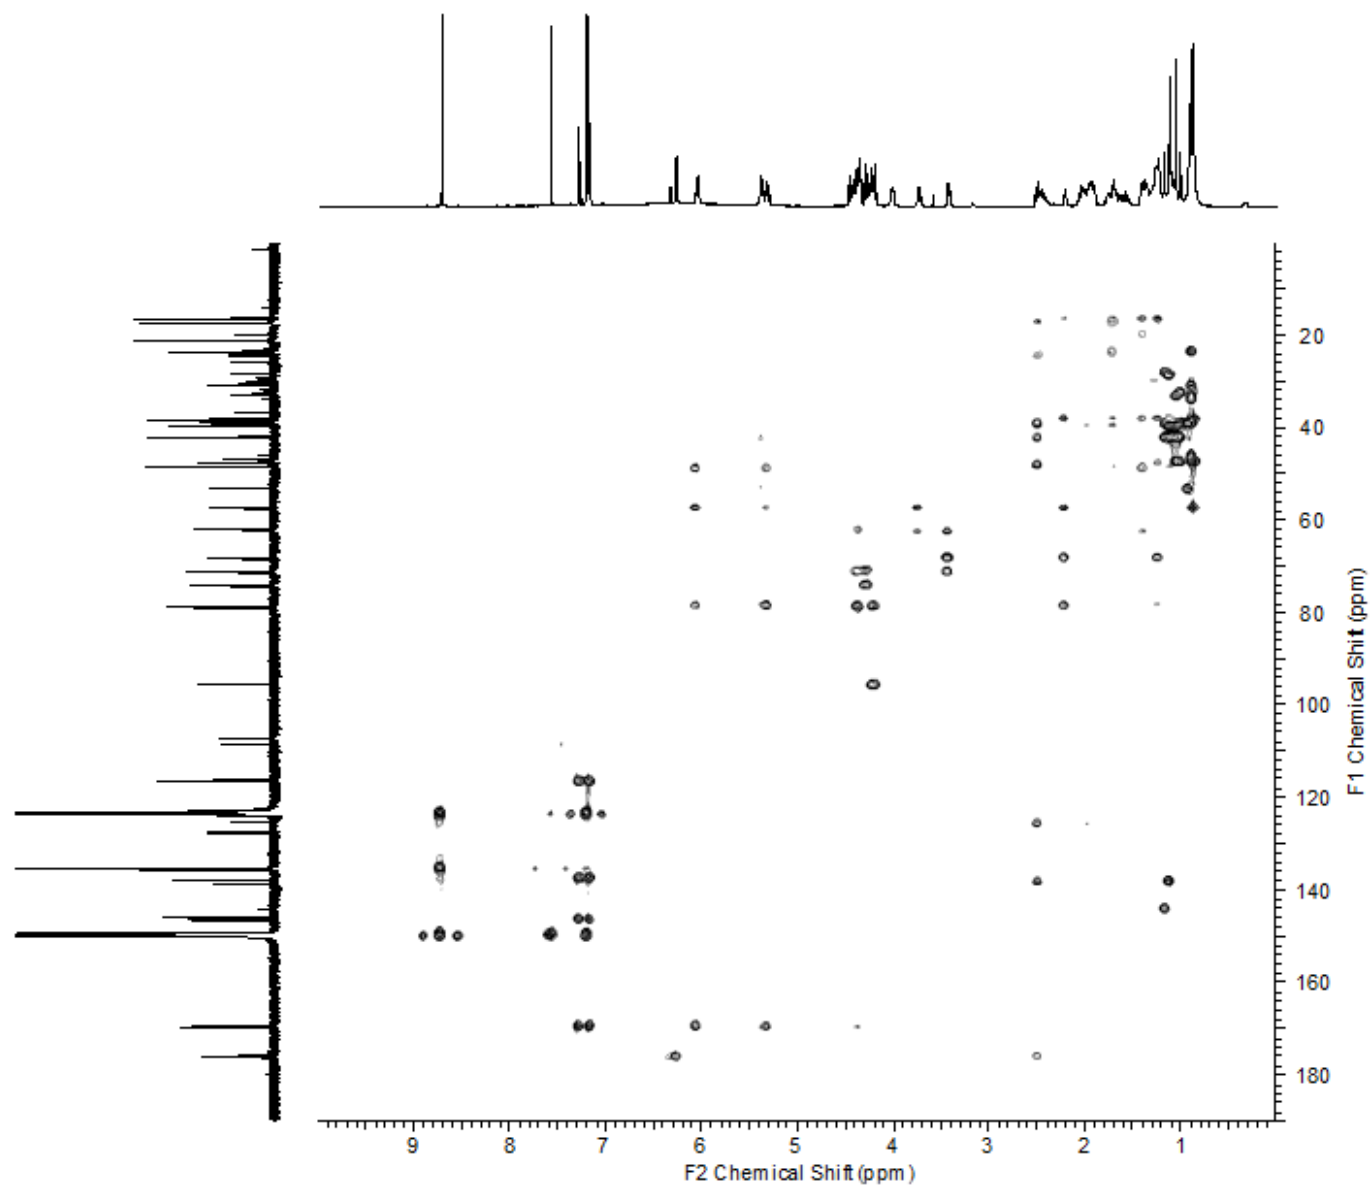

Figure S27. HMBC spectrum of **9** (pyridine- $d_5$ )



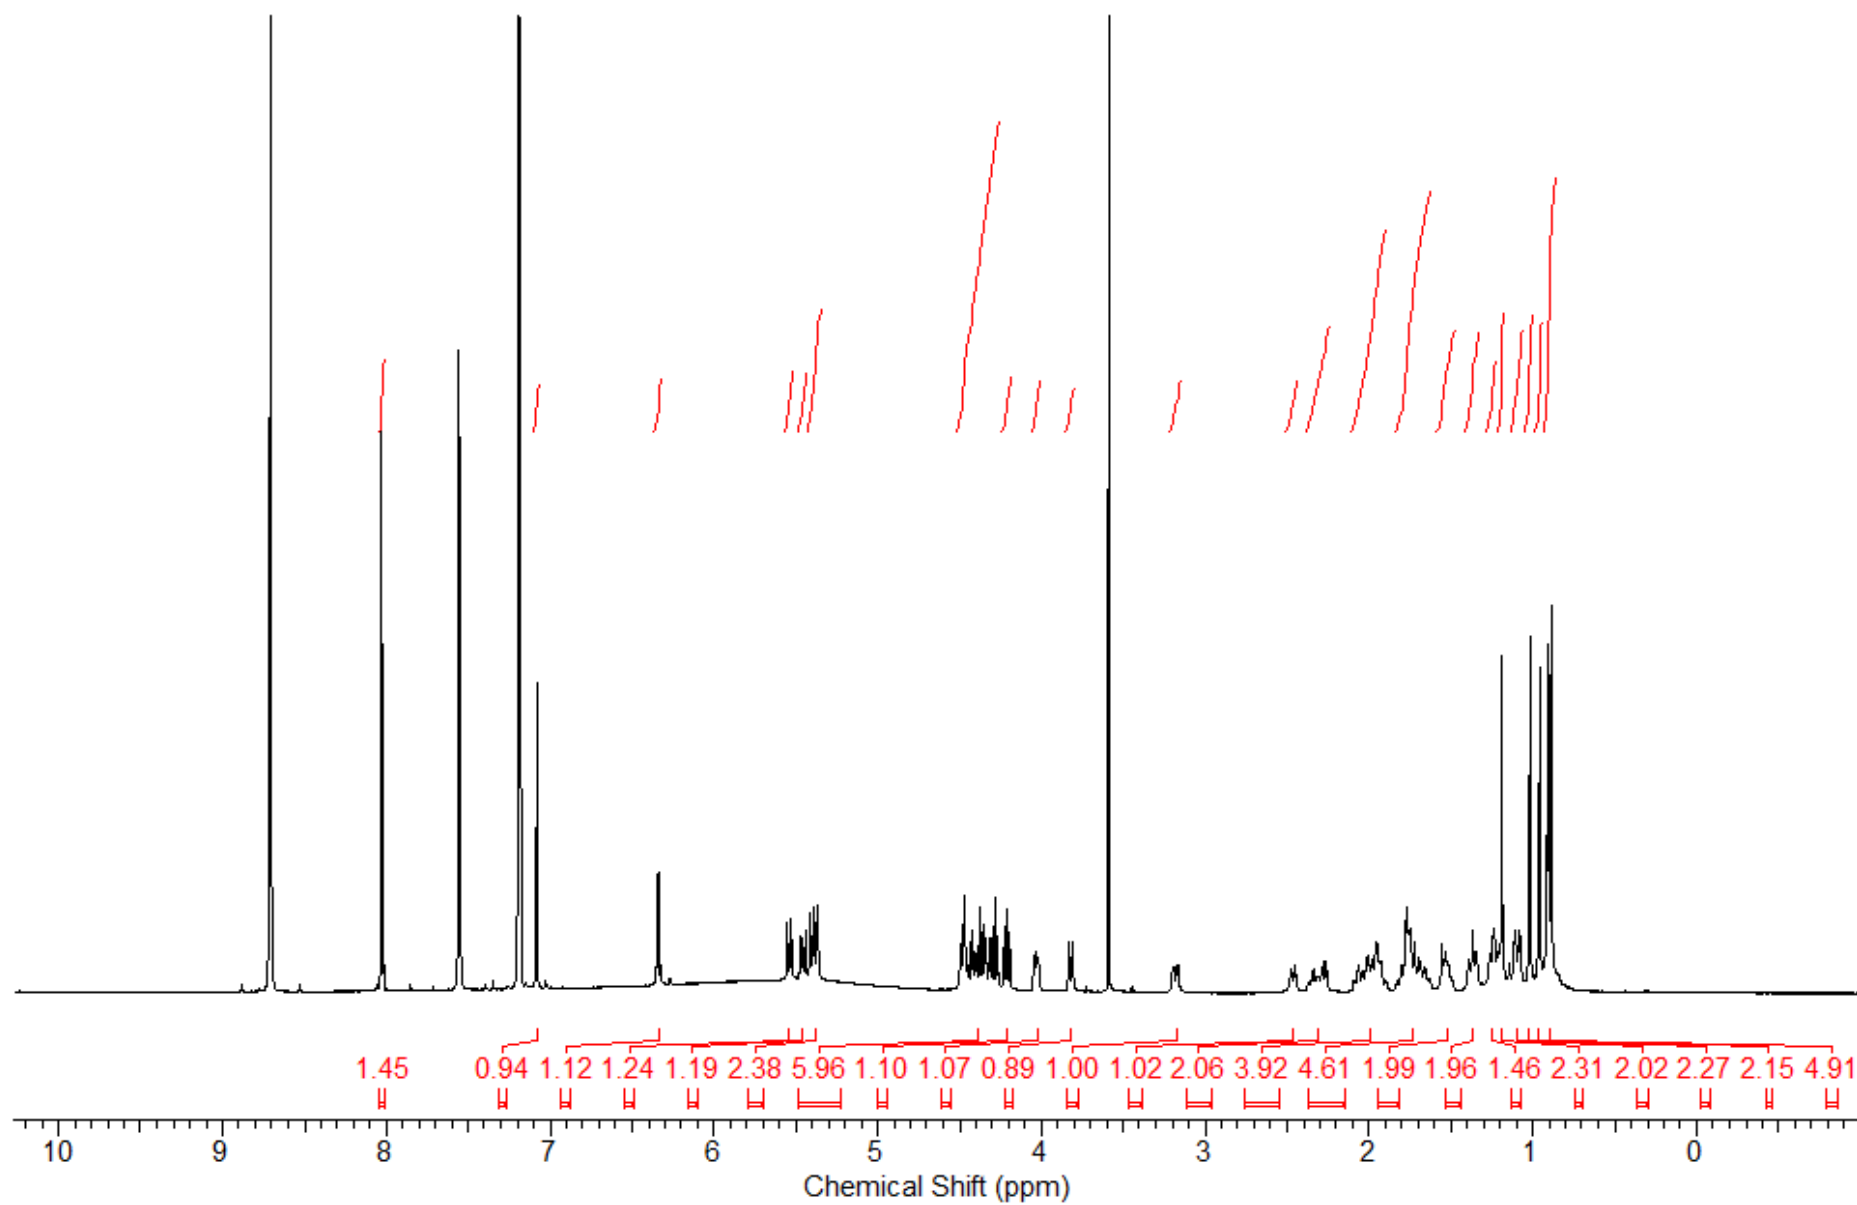

Figure S28.  $^1\text{H}$  NMR spectrum of **10** ( $\text{pyridine-}d_5$ , 500 MHz)

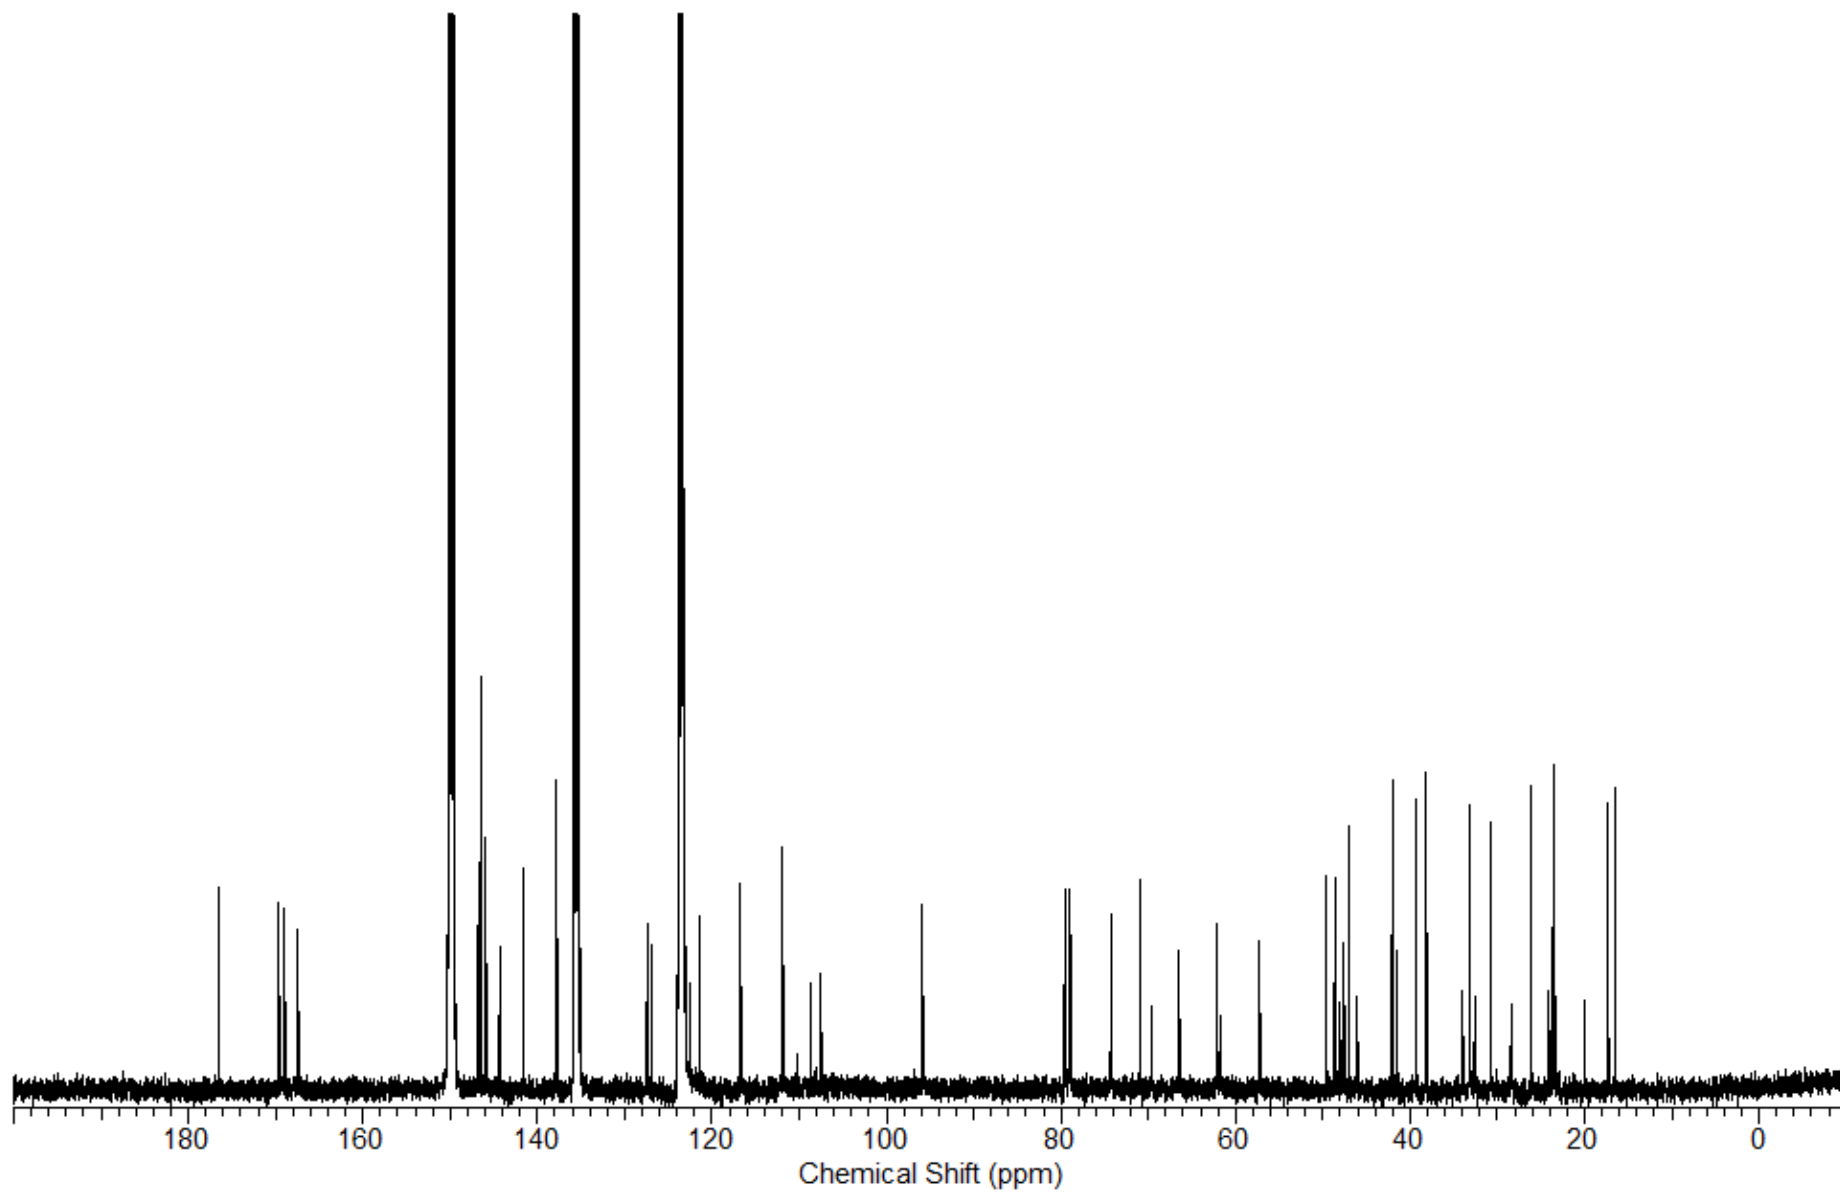

Figure S29.  $^{13}\text{C}$  NMR spectrum of **10** (pyridine- $d_5$ , 126 MHz)

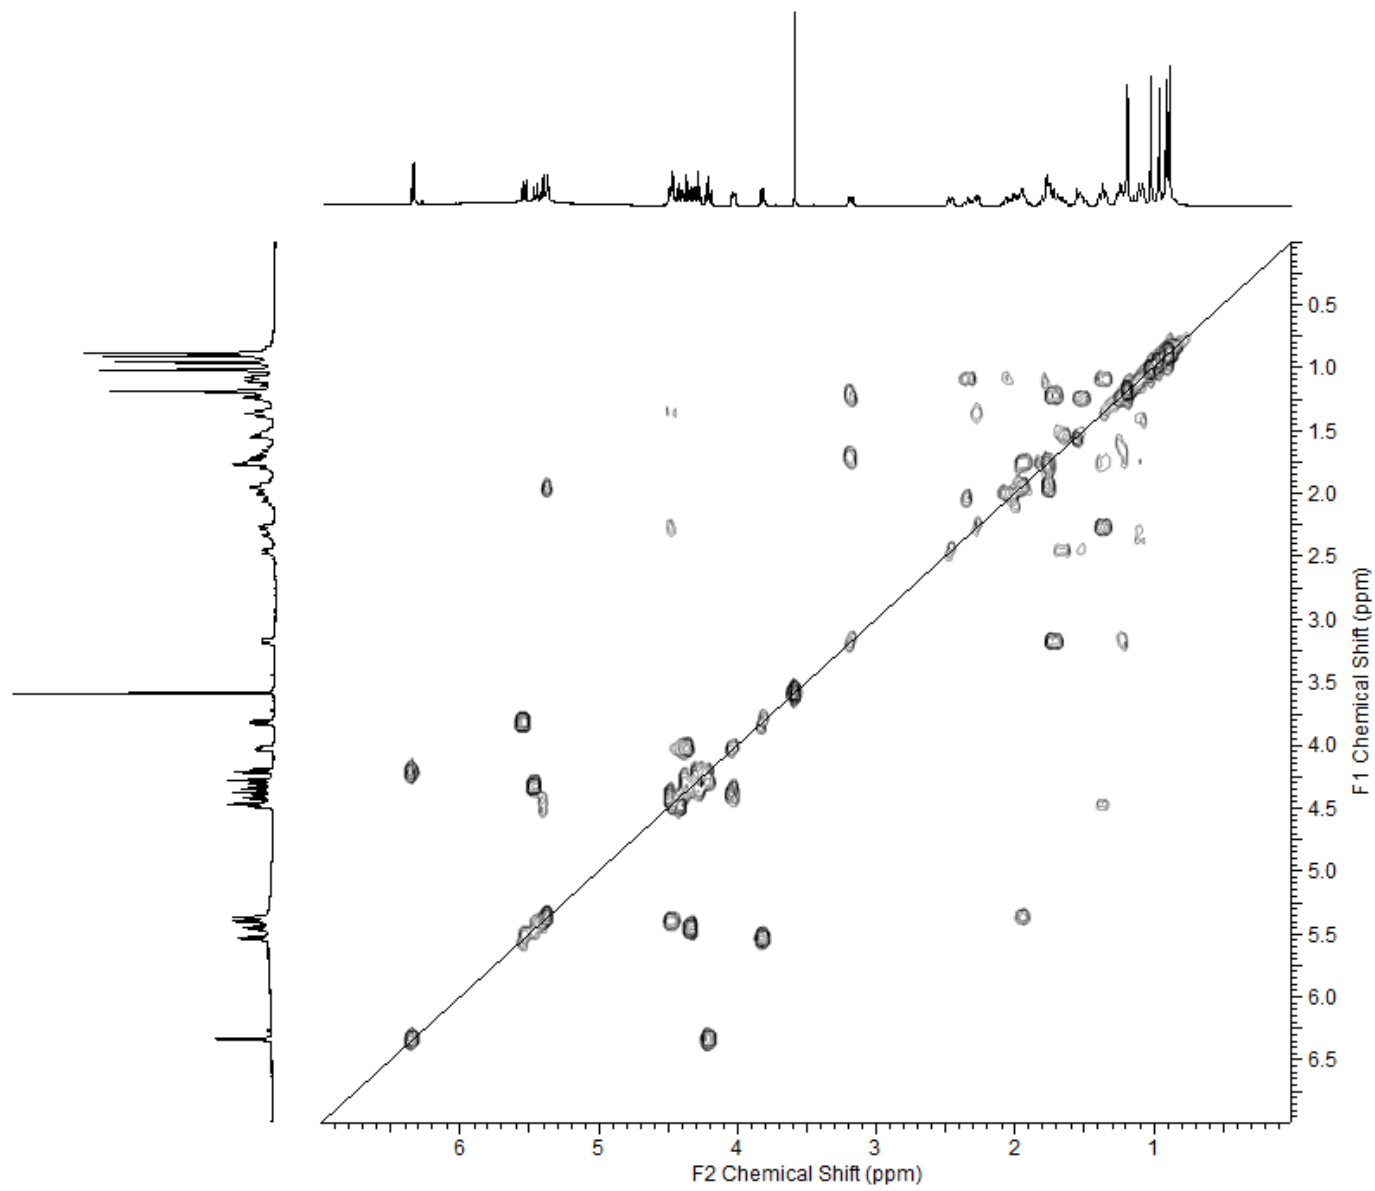

Figure S30.  $^1\text{H}$ - $^1\text{H}$  COSY spectrum of **10** (pyridine- $d_5$ , 500 MHz)

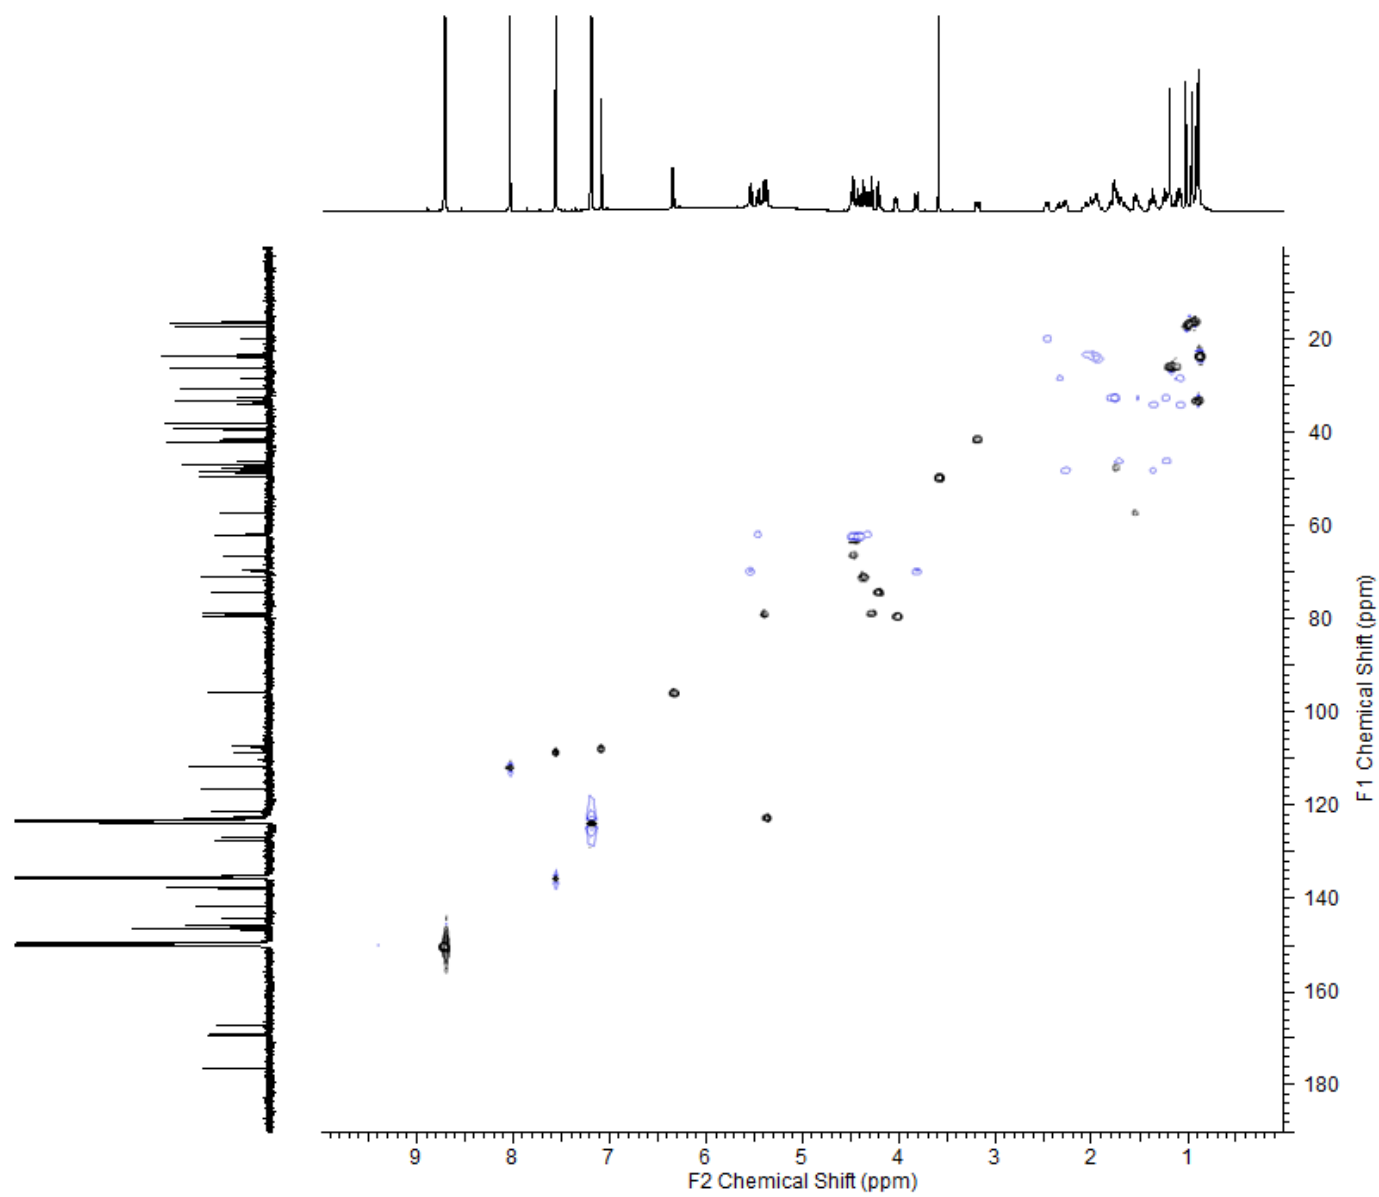

Figure S31. HSQC spectrum of **10** (pyridine-*d*<sub>5</sub>)

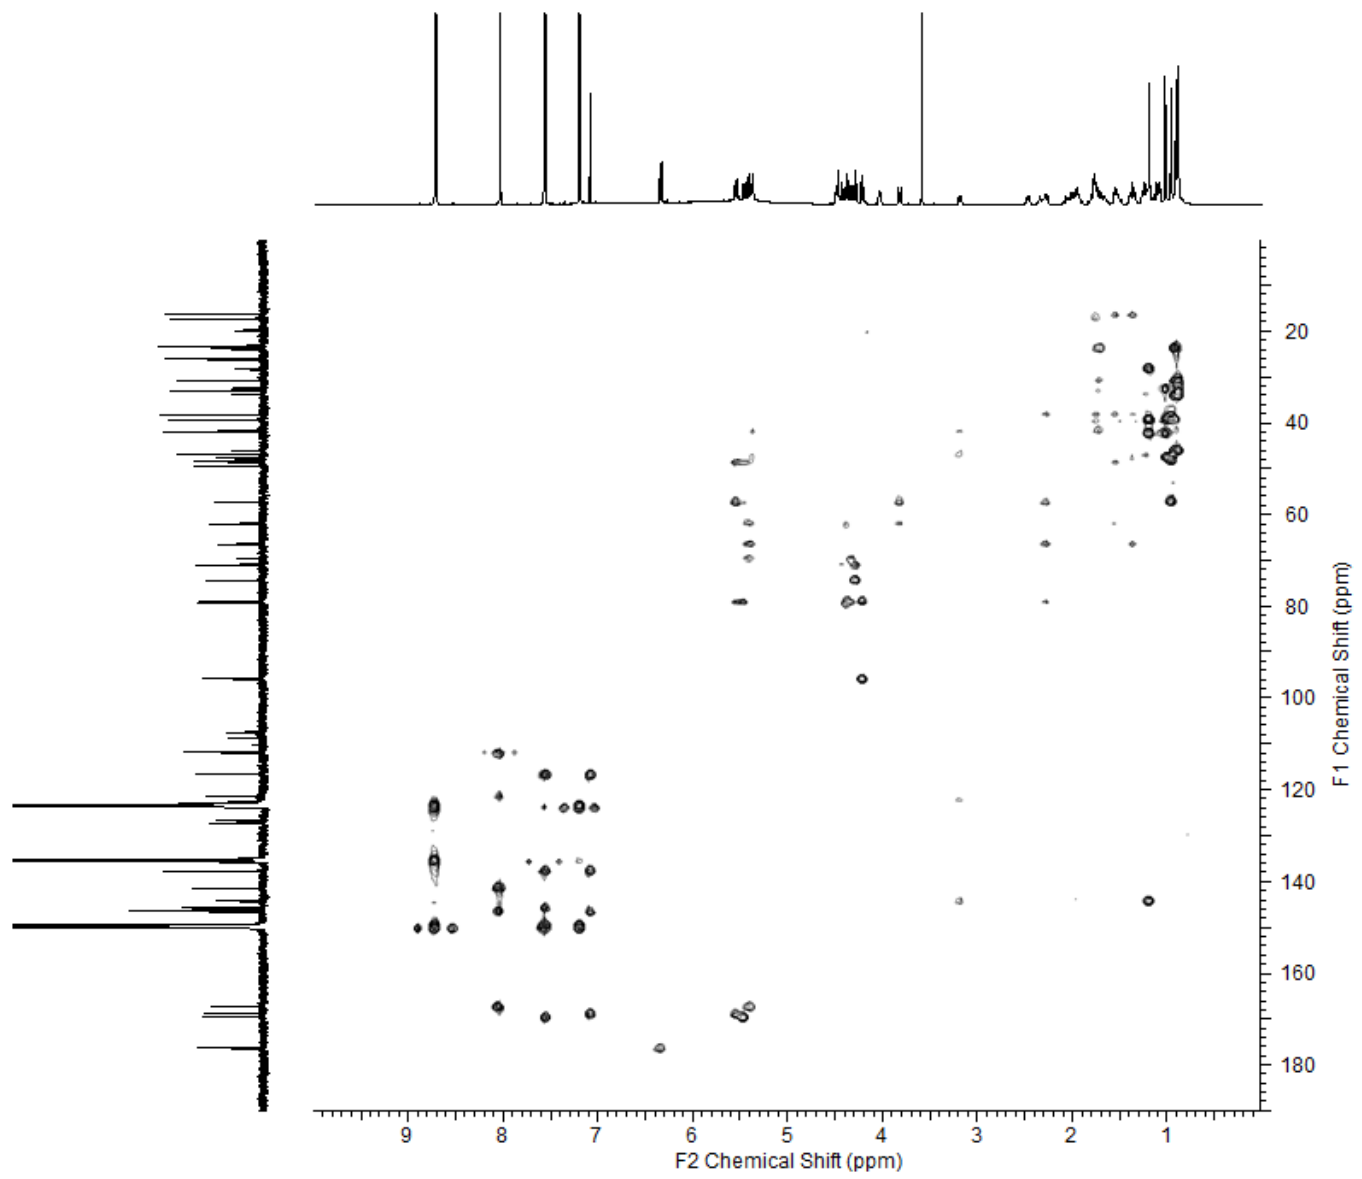

Figure S32. HMBC spectrum of 10 (pyridine- $d_5$ )

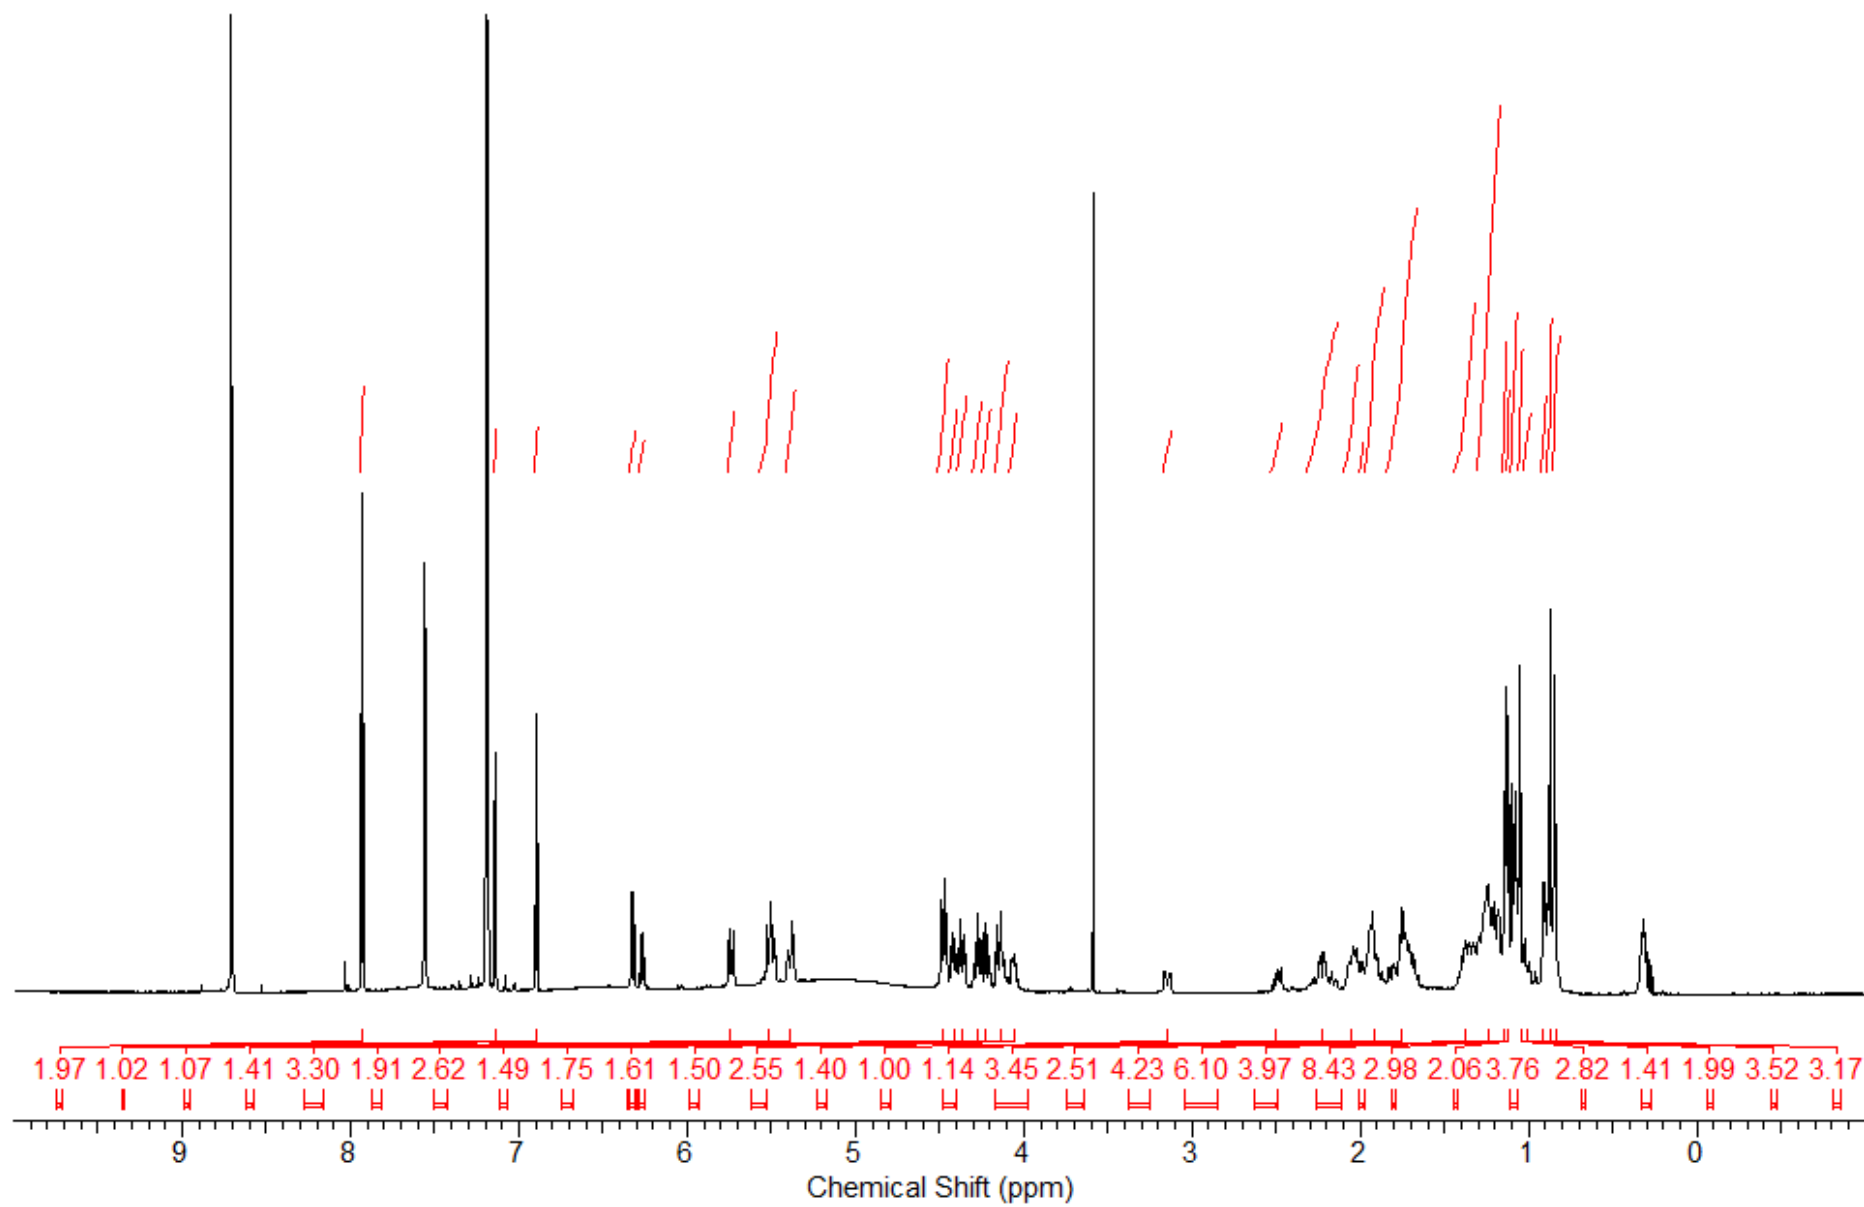

Figure S33.  $^1\text{H}$  NMR spectrum of 11 ( $\text{pyridine-}d_5$ , 500 MHz)

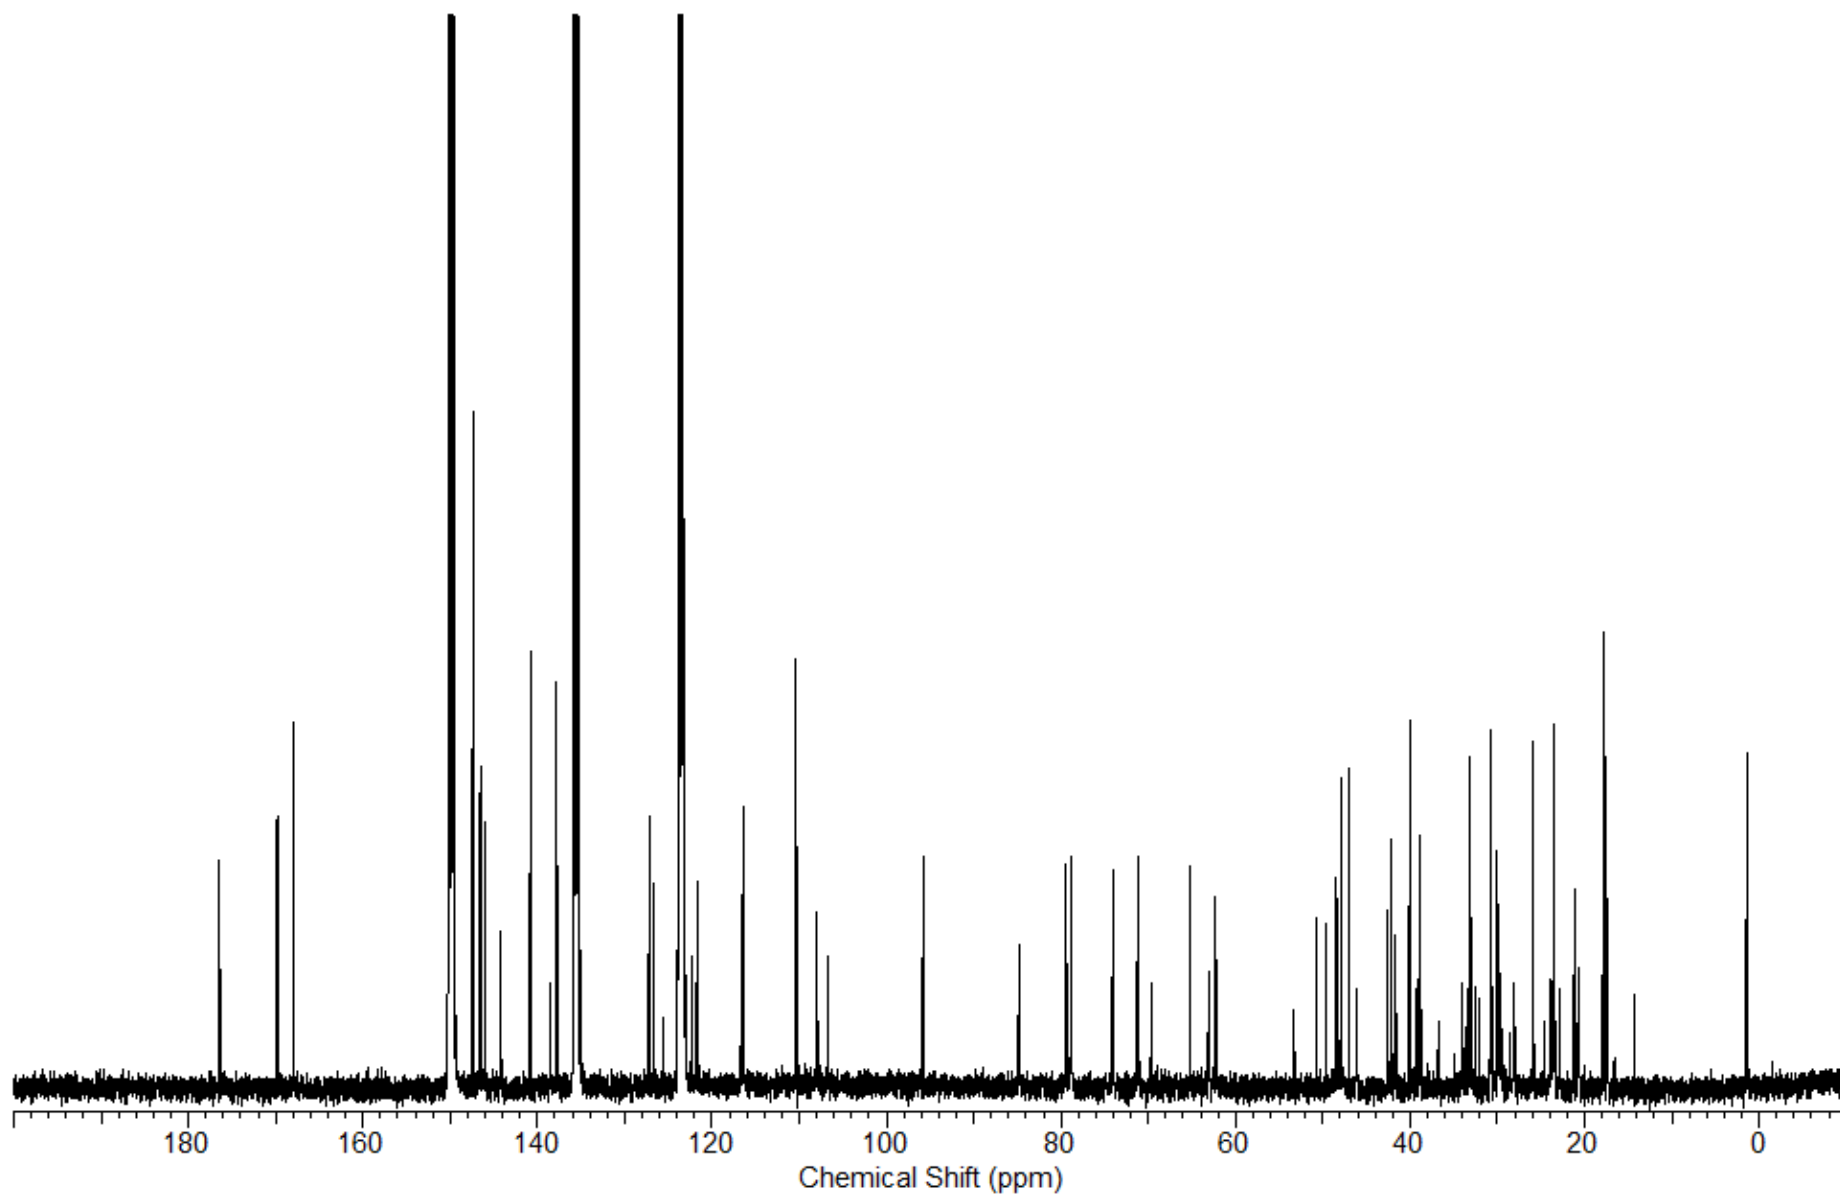

Figure S34.  $^{13}\text{C}$  NMR spectrum of **11** (pyridine- $d_5$ , 126 MHz)

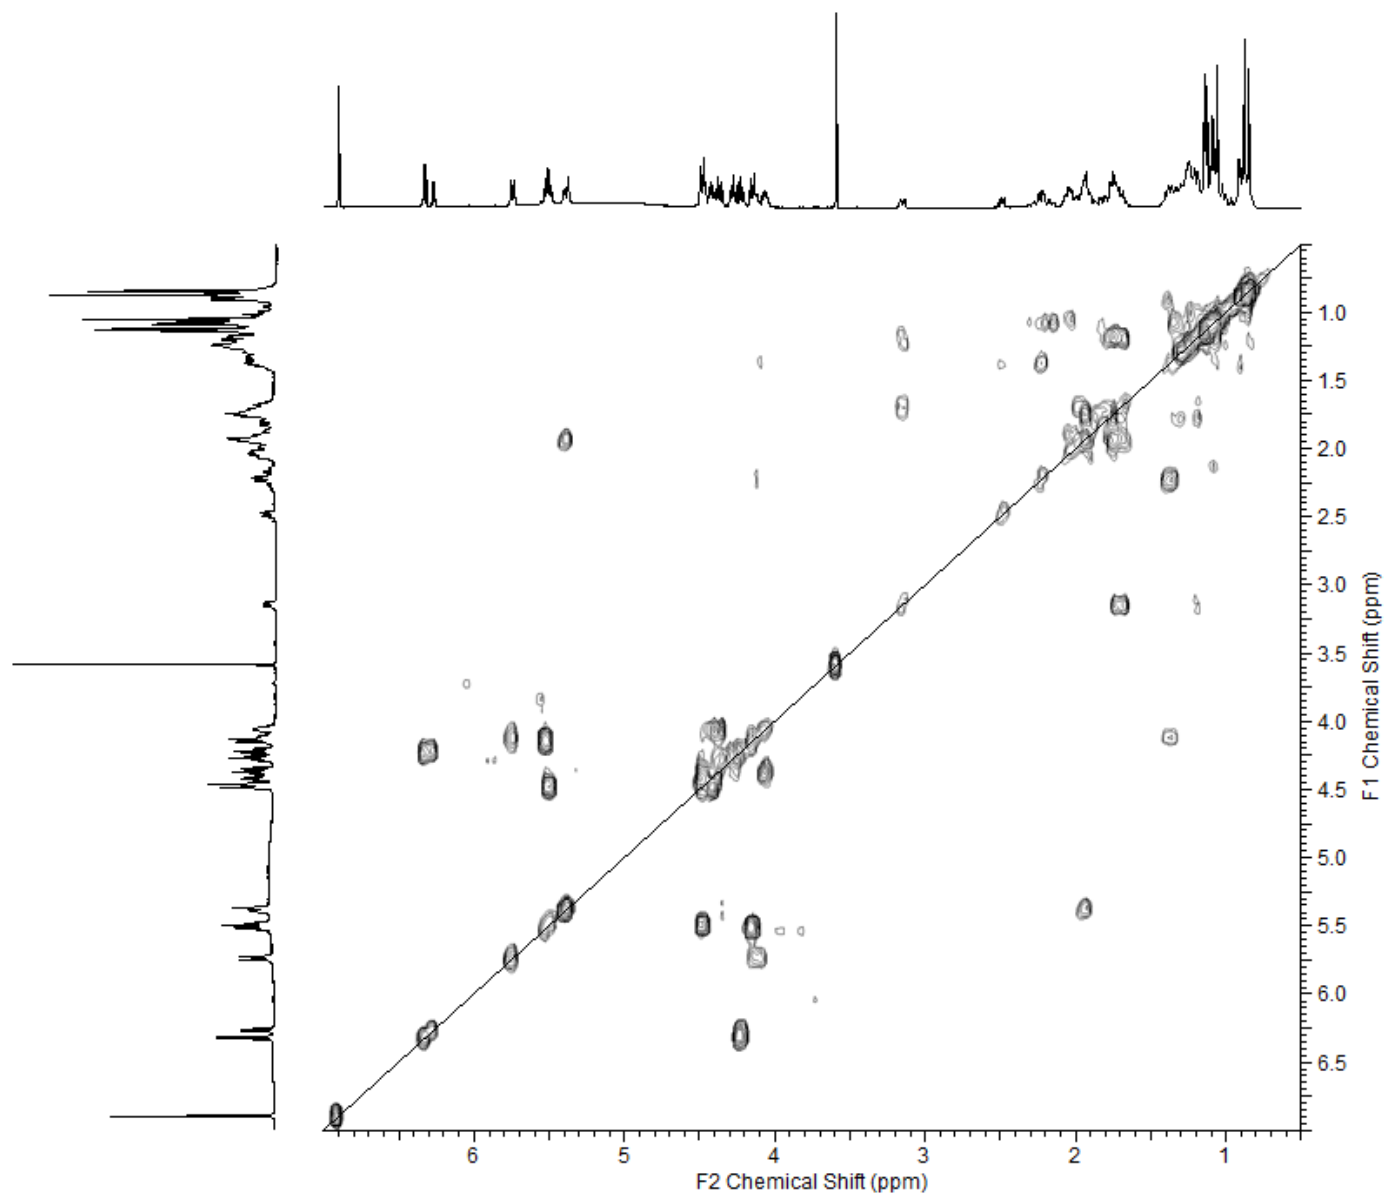

Figure S35.  $^1\text{H}$ - $^1\text{H}$  COSY spectrum of **11** (pyridine- $d_5$ , 500 MHz)



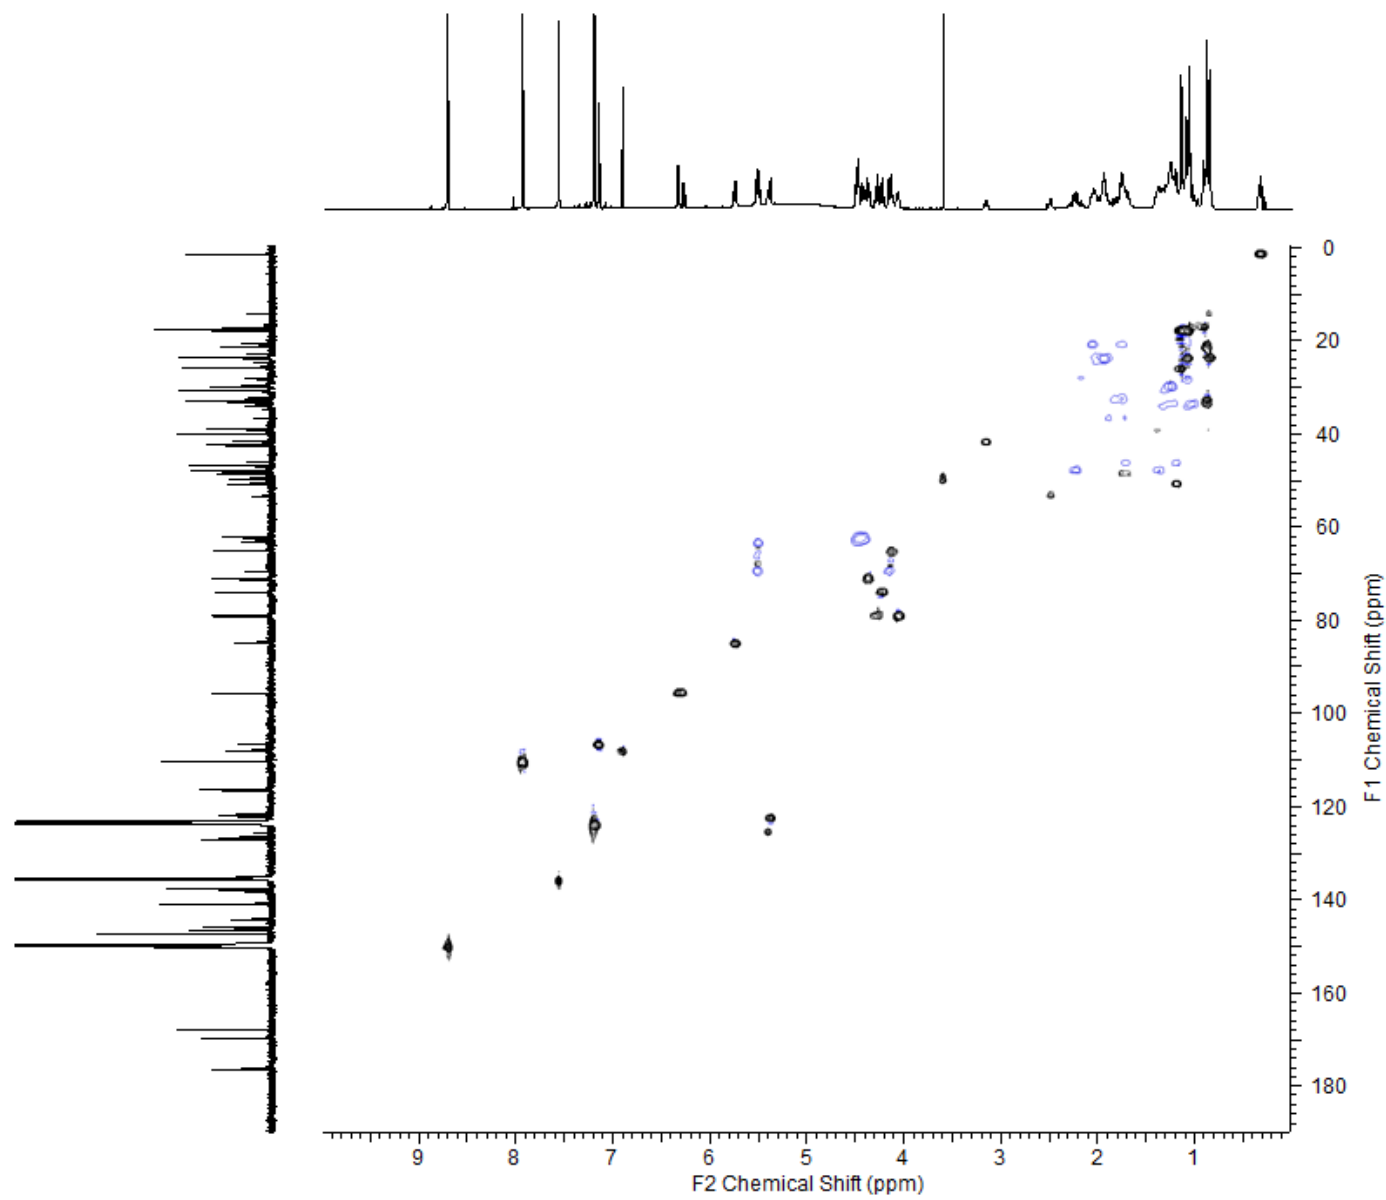

Figure S36. HSQC spectrum of **11** (pyridine-*d*<sub>5</sub>)

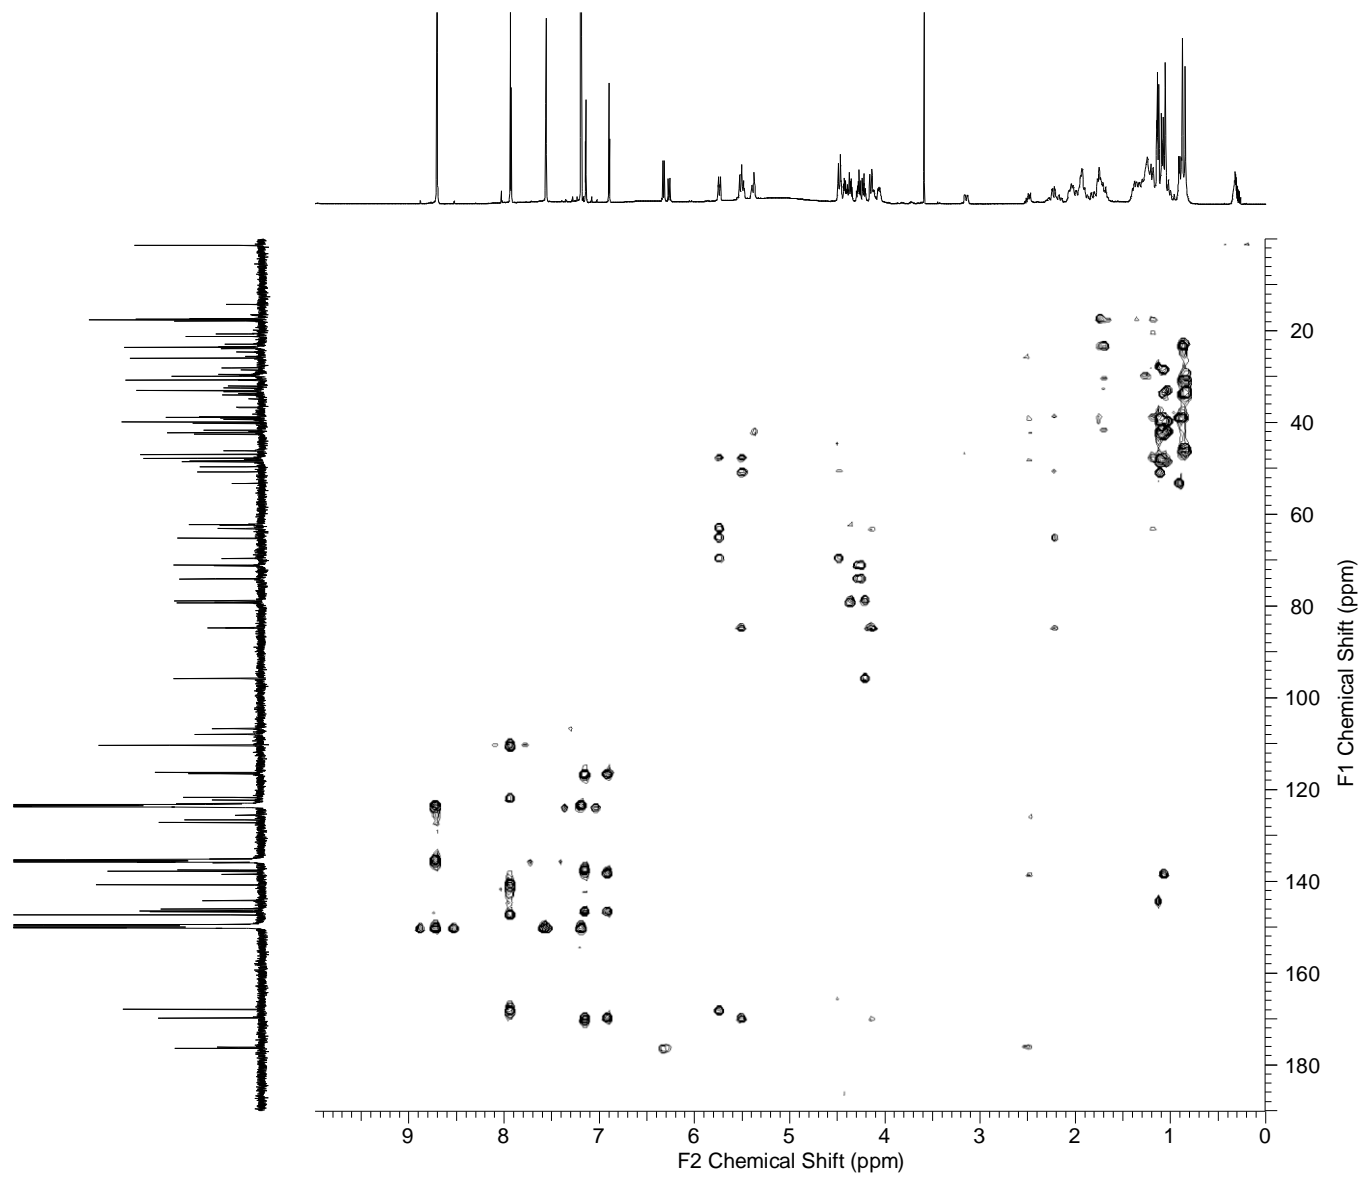

Figure S37. HMBC spectrum of 11 (pyridine- $d_5$ )

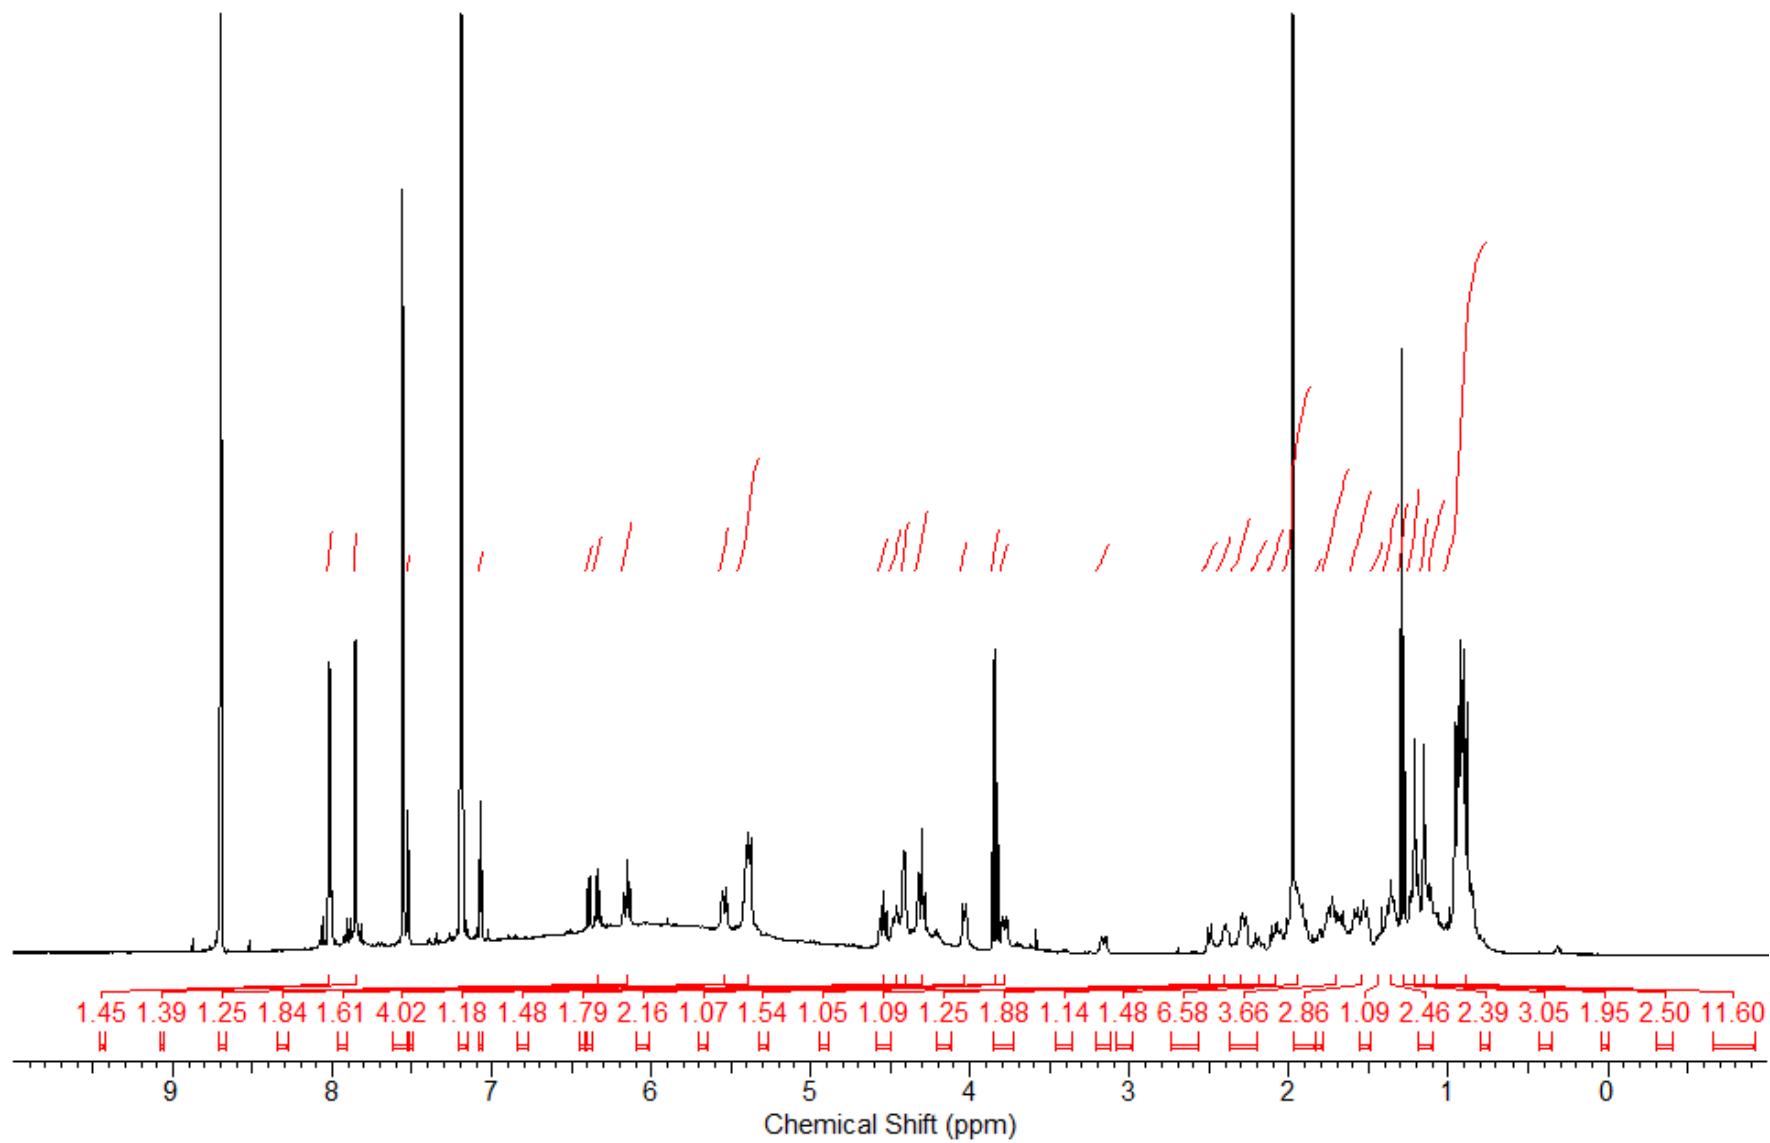

Figure S38.  $^1\text{H}$  NMR spectrum of **12** (pyridine- $d_5$ , 500 MHz)

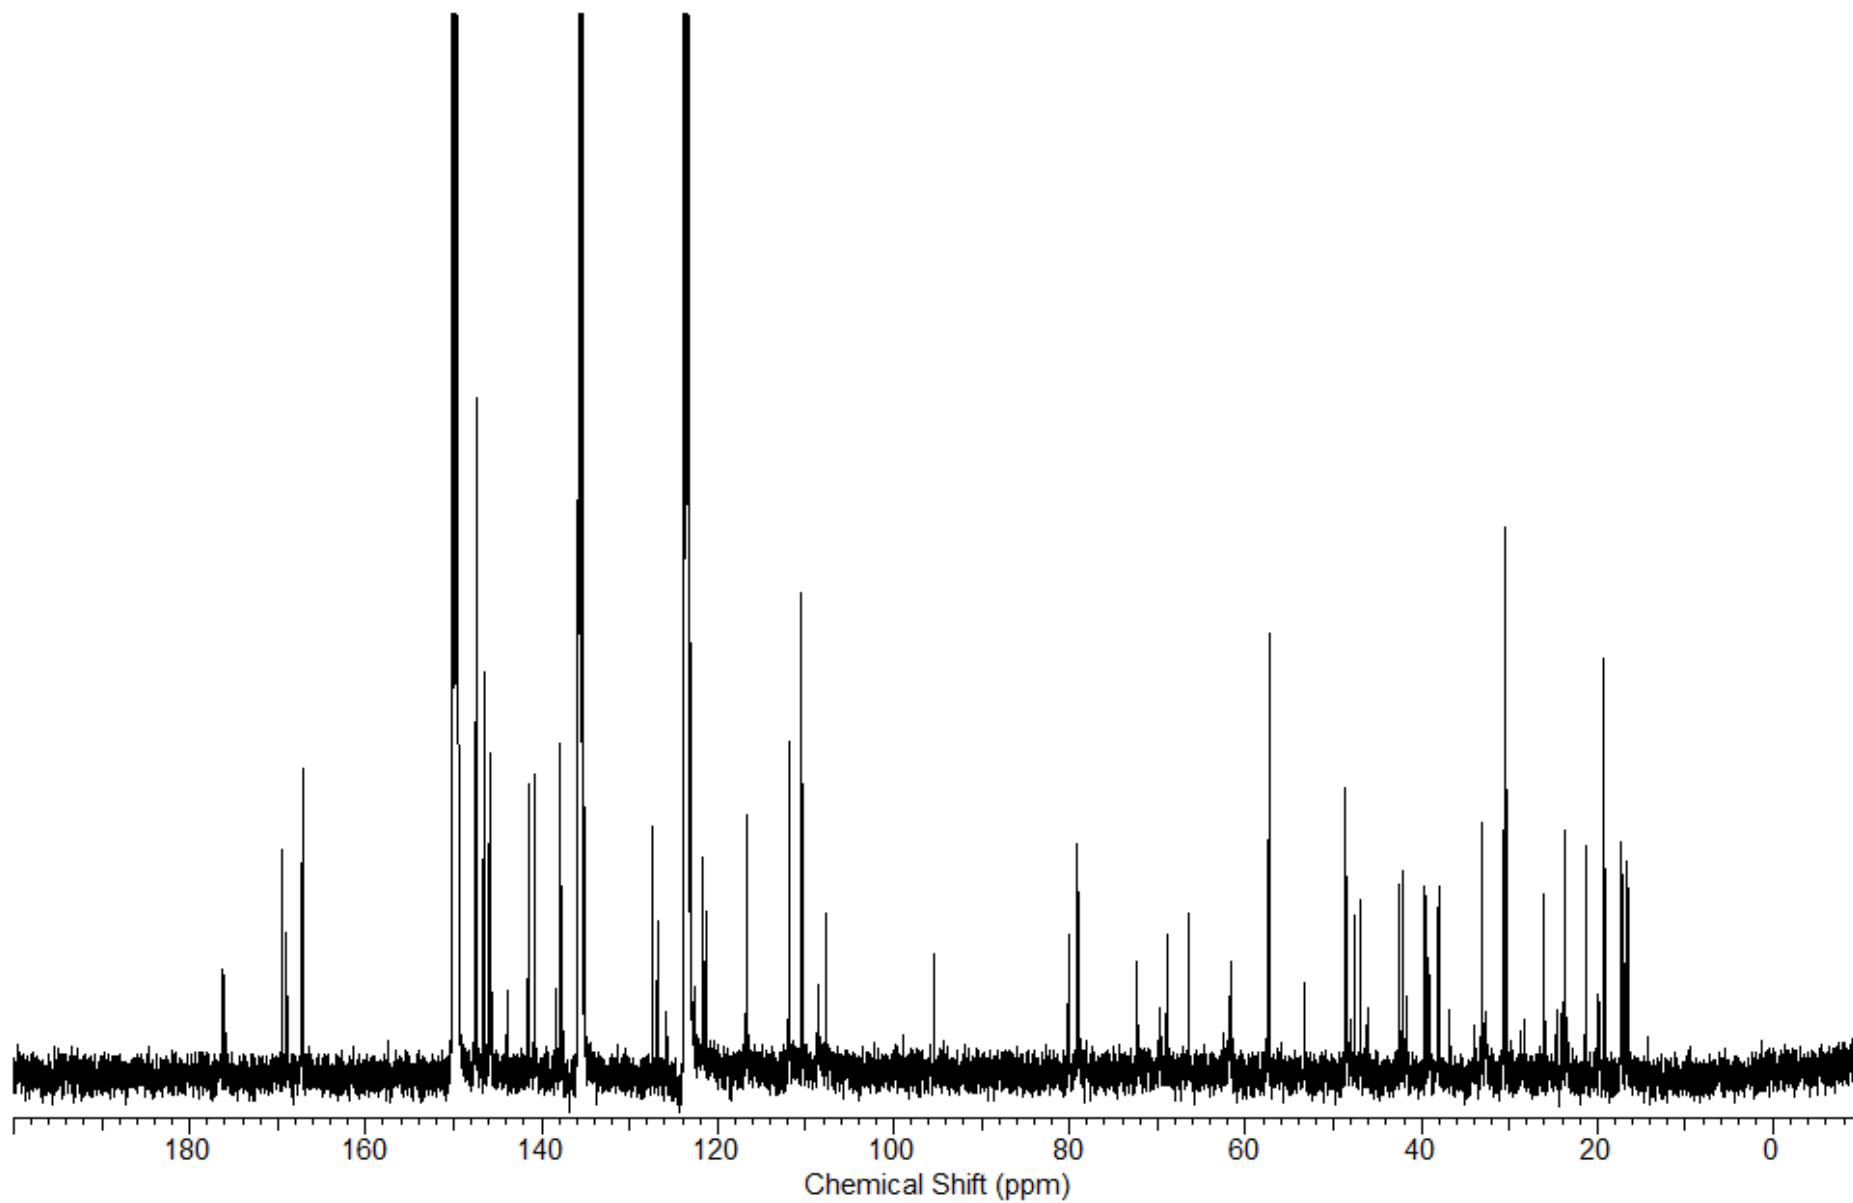

Figure S39.  $^{13}\text{C}$  NMR spectrum of **12** (pyridine- $d_5$ , 126 MHz)

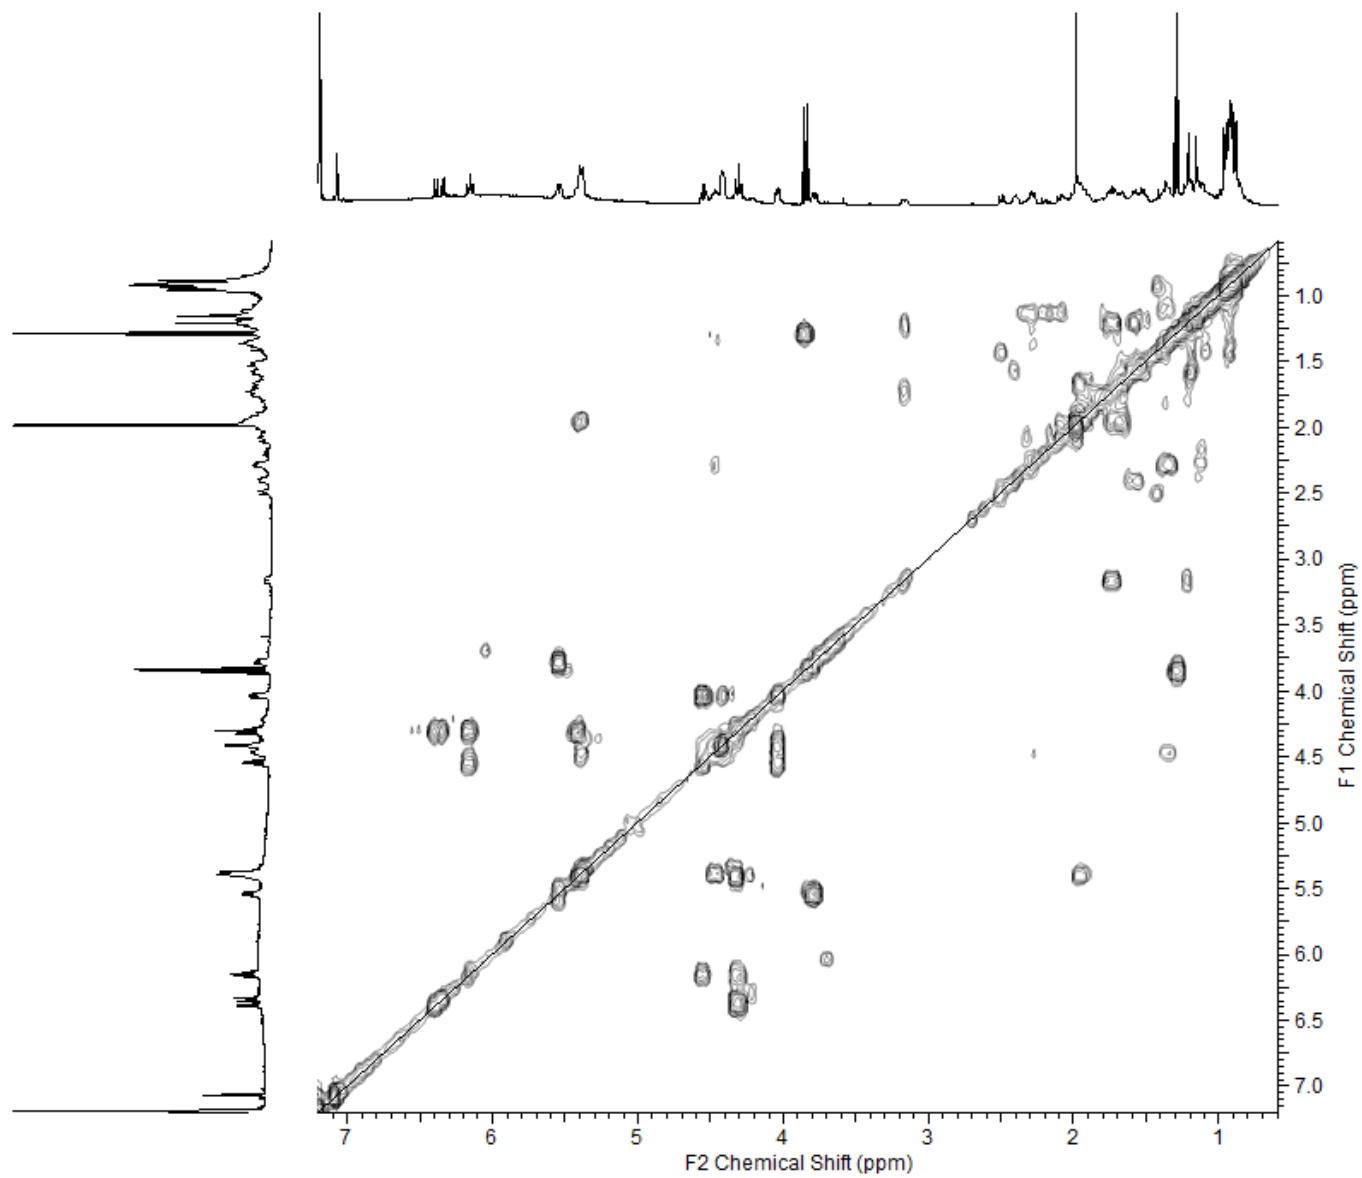

Figure S40.  $^1\text{H}$ - $^1\text{H}$  COSY spectrum of **12** (pyridine-*d*<sub>5</sub>, 500 MHz)

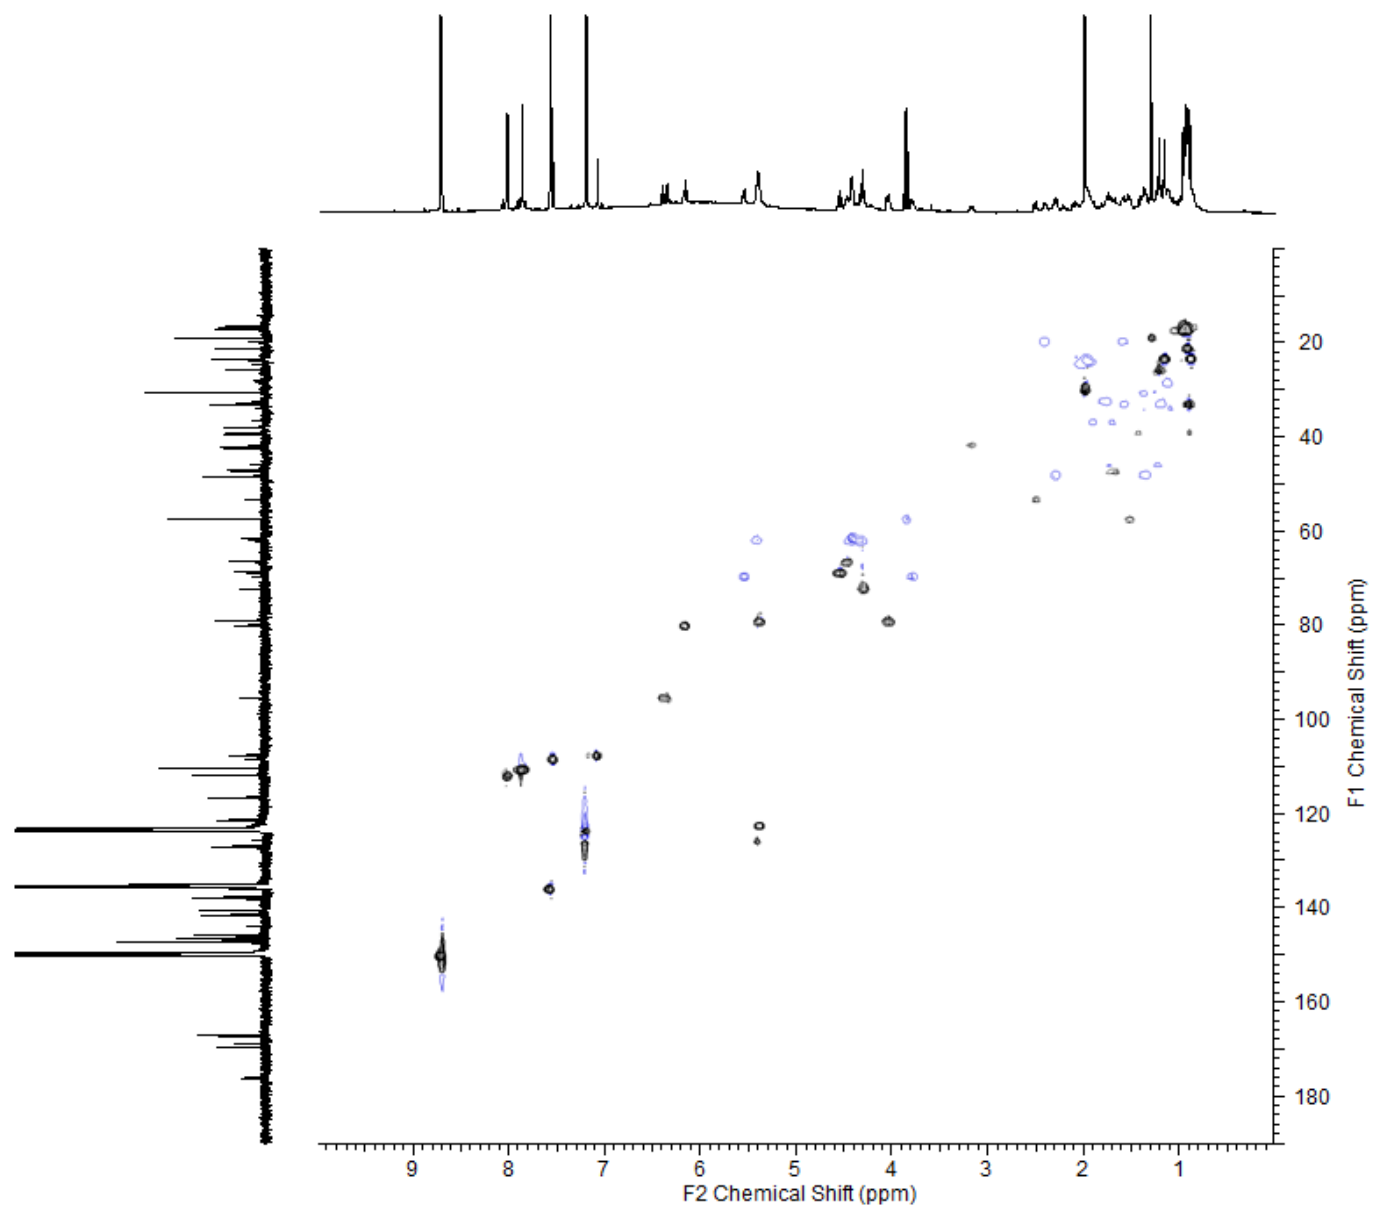

Figure S41. HSQC spectrum of 12 (pyridine-*d*<sub>5</sub>)

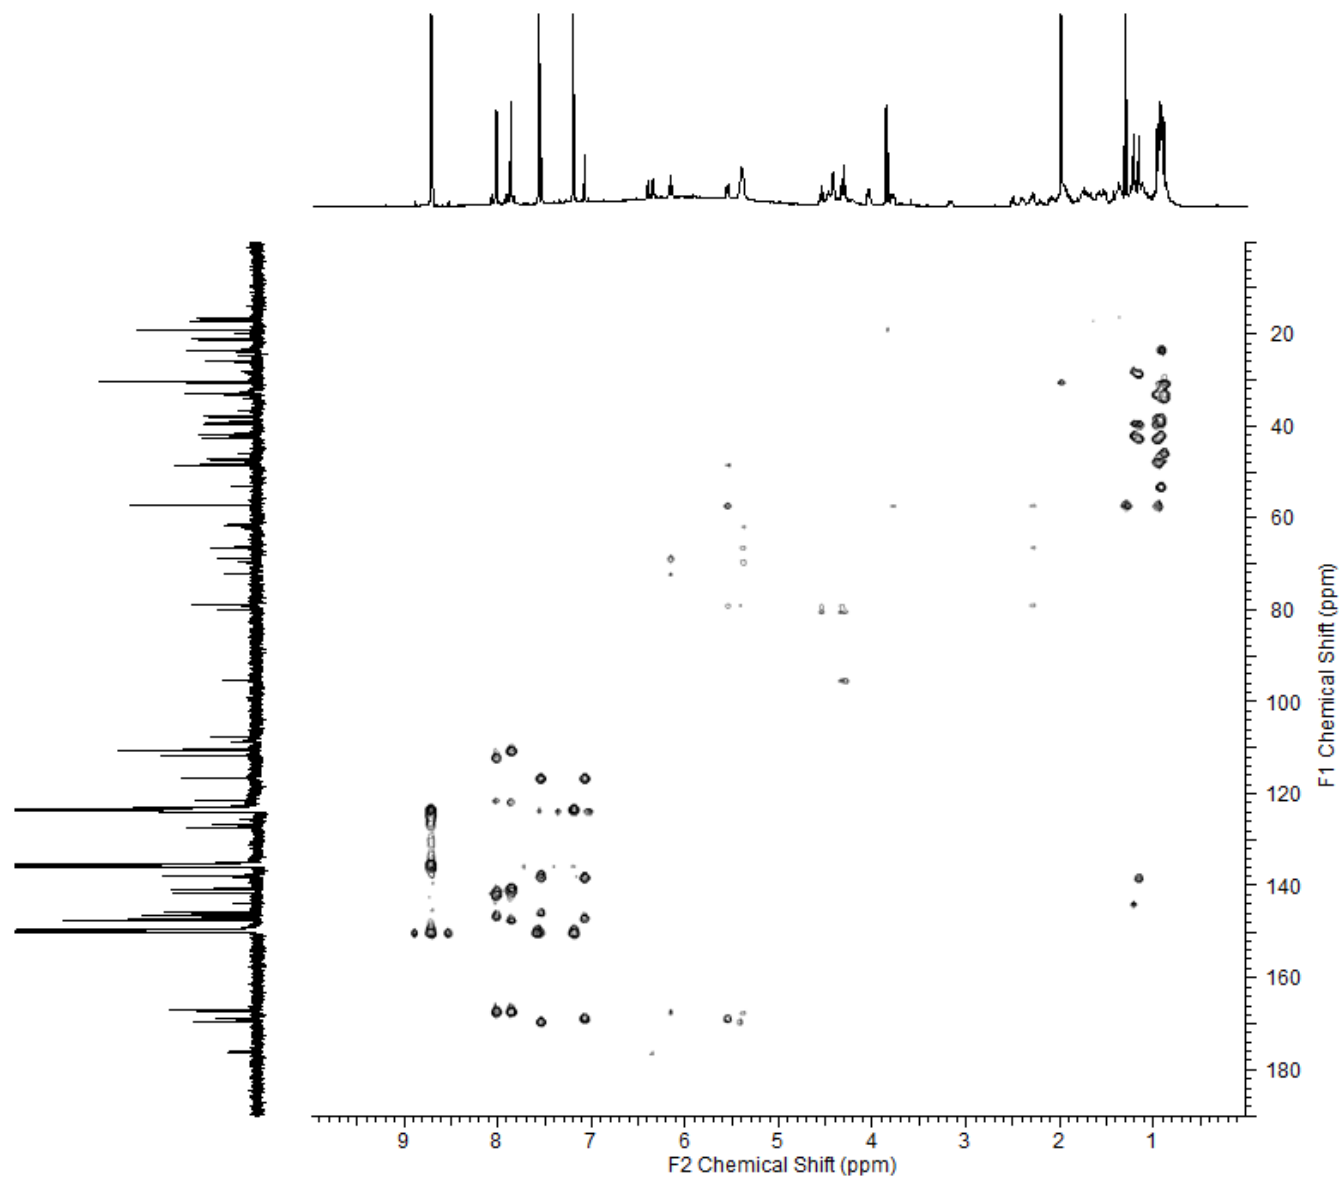

Figure S42. HMBC spectrum of **12** (pyridine- $d_5$ )

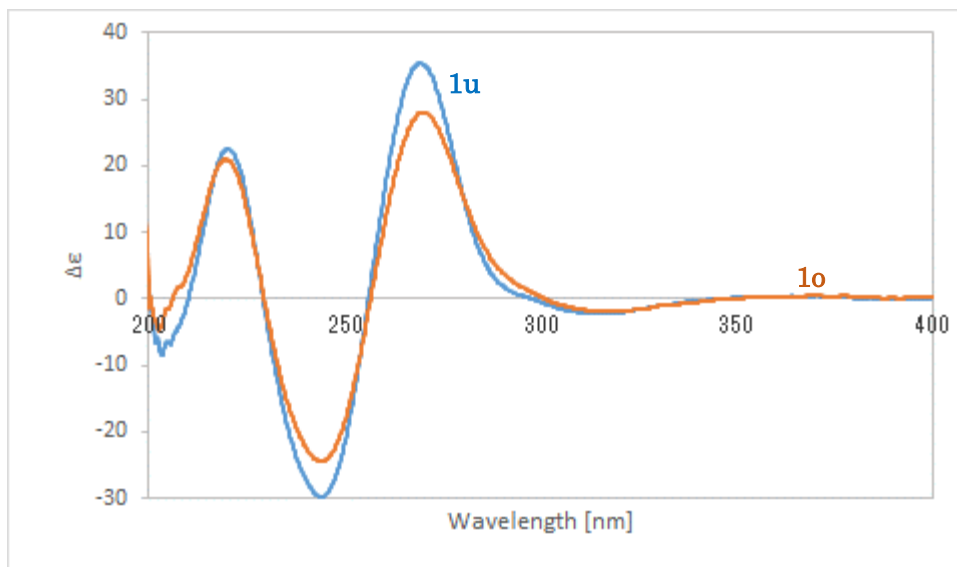

Figure S43. Experimental ECD spectra of **1o** and **1u**

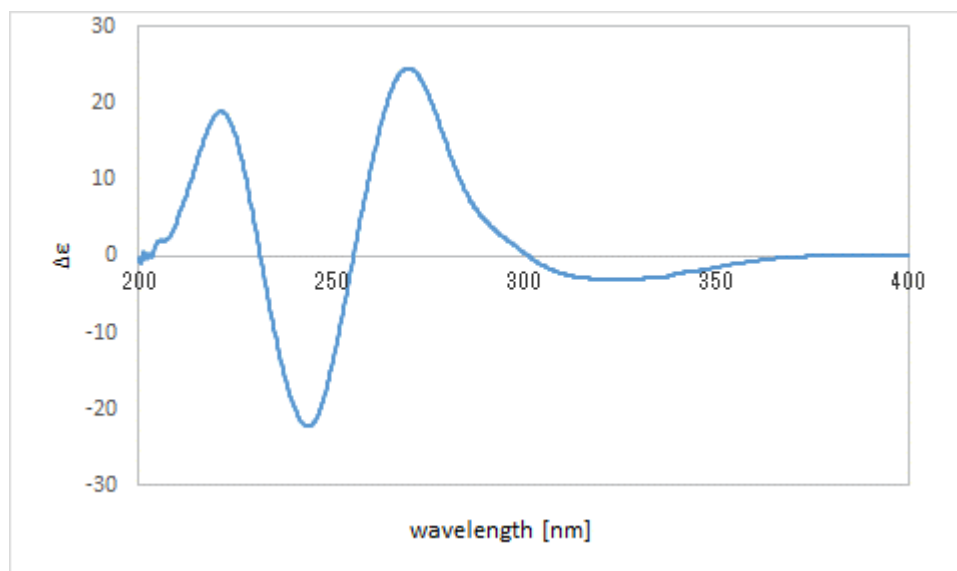

Figure S44. Experimental ECD spectra of **2o,u**



Figure S45. Lowest-energy conformers of 3,24-(*R*)-HHDP ester of methyl 2 $\alpha$ ,3 $\beta$ ,23,24-tetrahydroxyolean-12-en-28-oate (**4'oA**) and 3,23-(*R*)-HHDP ester of methyl 2 $\alpha$ ,3 $\beta$ ,23,24-tetrahydroxyolean-12-en-28-oate (**4'oB**) at the B3LYP/6-31G(d,p) level in pyridine.

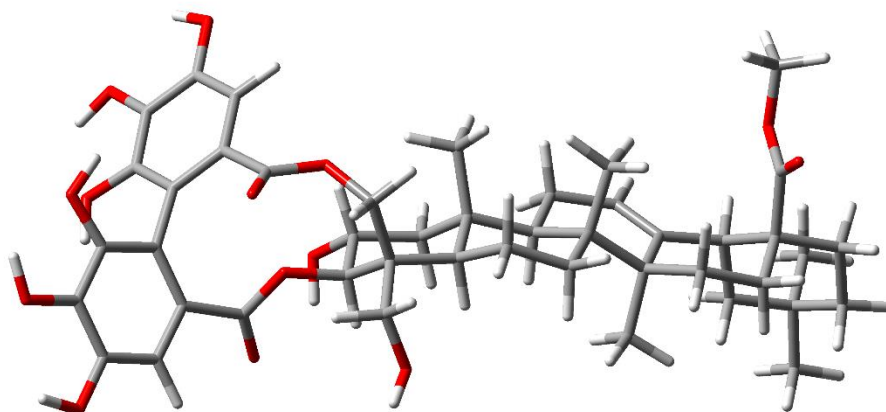

**4'oA** (3,24-(*R*)-HHDP ester)

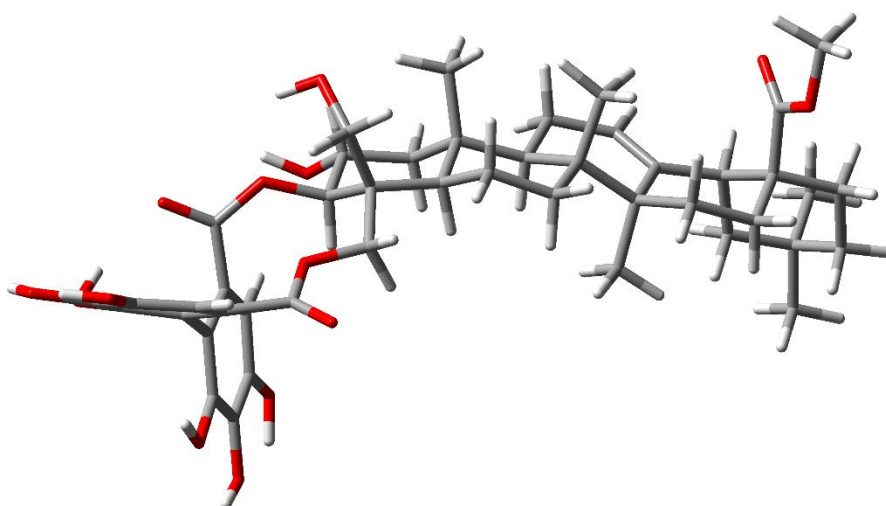

**4'oB** (3,23-(*R*)-HHDP ester)

Table S3. Calculated <sup>1</sup>H NMR chemical shifts of 4'oA.

| Position | calculated <sup>a</sup> |       |       |       |       |       |       |       |       |        |        |        |        |        |        |        |        | experimental <sup>b</sup> |                                       |      |
|----------|-------------------------|-------|-------|-------|-------|-------|-------|-------|-------|--------|--------|--------|--------|--------|--------|--------|--------|---------------------------|---------------------------------------|------|
|          | 4oA-1                   | 4oA-2 | 4oA-3 | 4oA-4 | 4oA-5 | 4oA-6 | 4oA-7 | 4oA-8 | 4oA-9 | 4oA-10 | 4oA-11 | 4oA-12 | 4oA-13 | 4oA-14 | 4oA-15 | 4oA-16 | 4oA-17 | averaged-4oA <sup>c</sup> | averaged-4oA (corrected) <sup>d</sup> | 4o   |
| 1        | 2.11                    | 2.12  | 2.01  | 1.99  | 2.03  | 2.01  | 2.05  | 1.97  | 2.04  | 2.18   | 2.04   | 2.09   | 2.15   | 2.14   | 1.95   | 2.01   | 2.00   | 2.07                      | 2.03                                  | 2.02 |
|          | 0.89                    | 0.89  | 0.89  | 0.91  | 0.93  | 0.94  | 0.97  | 0.87  | 1.04  | 0.98   | 0.97   | 0.93   | 0.98   | 0.93   | 0.89   | 1.03   | 0.91   | 0.91                      | 0.82                                  | 1.16 |
| 2        | 3.95                    | 3.96  | 3.42  | 3.39  | 3.49  | 3.46  | 3.53  | 3.33  | 4.20  | 3.89   | 3.53   | 4.03   | 3.89   | 4.23   | 3.32   | 4.20   | 3.45   | 3.76                      | 3.78                                  | 4.17 |
| 3        | 5.38                    | 5.39  | 4.20  | 4.21  | 5.15  | 5.15  | 4.96  | 4.49  | 5.65  | 4.98   | 4.98   | 5.39   | 4.97   | 5.45   | 4.50   | 5.63   | 4.21   | 5.08                      | 5.15                                  | 5.82 |
| 5        | 1.75                    | 1.76  | 1.41  | 1.38  | 1.85  | 1.82  | 1.18  | 1.39  | 1.79  | 1.19   | 1.19   | 1.76   | 1.18   | 1.79   | 1.41   | 1.80   | 1.39   | 1.64                      | 1.58                                  | 1.97 |
| 6        | 1.53                    | 1.52  | 2.96  | 2.94  | 1.71  | 1.70  | 1.46  | 2.86  | 1.57  | 1.48   | 1.47   | 1.54   | 1.49   | 1.56   | 2.87   | 1.57   | 2.98   | 1.86                      | 1.80                                  | 1.66 |
|          | 1.54                    | 1.54  | 1.64  | 1.61  | 1.54  | 1.52  | 1.54  | 1.63  | 1.55  | 1.56   | 1.54   | 1.58   | 1.58   | 1.58   | 1.65   | 1.56   | 1.60   | 1.56                      | 1.50                                  | 1.34 |
| 7        | 1.82                    | 1.82  | 1.80  | 1.83  | 1.78  | 1.80  | 1.72  | 1.83  | 1.75  | 1.69   | 1.80   | 1.75   | 1.83   | 1.83   | 1.83   | 1.83   | 1.84   | 1.81                      | 1.75                                  | 1.59 |
|          | 1.44                    | 1.43  | 1.40  | 1.46  | 1.41  | 1.45  | 1.43  | 1.45  | 1.44  | 1.39   | 1.45   | 1.42   | 1.47   | 1.44   | 1.44   | 1.43   | 1.46   | 1.43                      | 1.36                                  | 1.30 |
| 9        | 1.85                    | 1.83  | 1.79  | 1.77  | 1.83  | 1.81  | 1.74  | 1.76  | 1.86  | 1.80   | 1.77   | 1.86   | 1.82   | 1.87   | 1.80   | 1.87   | 1.77   | 1.82                      | 1.77                                  | 1.73 |
| 11       | 2.17                    | 2.17  | 2.08  | 2.06  | 2.11  | 2.10  | 2.07  | 2.04  | 2.18  | 2.14   | 2.08   | 2.18   | 2.14   | 2.21   | 2.06   | 2.16   | 2.06   | 2.13                      | 2.09                                  | 1.89 |
| 12       | 5.87                    | 5.92  | 5.87  | 5.85  | 5.89  | 5.90  | 5.84  | 5.86  | 5.93  | 5.90   | 5.87   | 5.85   | 5.84   | 5.88   | 5.79   | 5.89   | 5.85   | 5.88                      | 5.98                                  | 5.34 |
| 15       | 2.01                    | 1.72  | 1.90  | 1.64  | 1.91  | 1.63  | 1.62  | 1.66  | 1.65  | 1.63   | 1.88   | 2.00   | 1.90   | 1.98   | 1.89   | 1.97   | 1.64   | 1.83                      | 1.77                                  | 2.27 |
|          | 1.18                    | 1.26  | 1.14  | 1.23  | 1.14  | 1.22  | 1.22  | 1.22  | 1.26  | 1.21   | 1.13   | 1.16   | 1.13   | 1.15   | 1.15   | 1.22   | 1.24   | 1.20                      | 1.12                                  | 1.05 |
| 16       | 2.06                    | 2.18  | 2.01  | 2.17  | 2.02  | 2.14  | 2.17  | 2.17  | 2.12  | 2.12   | 2.01   | 2.05   | 2.01   | 2.06   | 2.05   | 2.07   | 2.18   | 2.10                      | 2.06                                  | 1.97 |
|          | 1.77                    | 1.78  | 1.76  | 1.78  | 1.75  | 1.78  | 1.78  | 1.78  | 1.79  | 1.77   | 1.77   | 1.75   | 1.80   | 1.79   | 1.79   | 1.78   | 1.77   | 1.77                      | 1.72                                  | 1.89 |
| 18       | 3.19                    | 3.21  | 3.18  | 3.23  | 3.18  | 3.24  | 3.27  | 3.26  | 3.24  | 3.28   | 3.22   | 3.20   | 3.22   | 3.20   | 3.21   | 3.23   | 3.21   | 3.23                      | 3.21                                  | 3.13 |
| 19       | 1.81                    | 1.82  | 1.81  | 1.81  | 1.82  | 1.83  | 1.80  | 1.76  | 1.80  | 1.75   | 1.83   | 1.80   | 1.75   | 1.80   | 1.83   | 1.86   | 1.81   | 1.81                      | 1.76                                  | 1.63 |
|          | 1.23                    | 1.27  | 1.18  | 1.27  | 1.18  | 1.26  | 1.27  | 1.26  | 1.27  | 1.26   | 1.21   | 1.24   | 1.23   | 1.25   | 1.25   | 1.24   | 1.27   | 1.24                      | 1.16                                  | 1.16 |
| 21       | 1.52                    | 1.53  | 1.53  | 1.54  | 1.53  | 1.51  | 1.53  | 1.56  | 1.51  | 1.54   | 1.52   | 1.52   | 1.51   | 1.54   | 1.50   | 1.50   | 1.54   | 1.53                      | 1.46                                  | 1.30 |
|          | 1.36                    | 1.35  | 1.38  | 1.25  | 1.38  | 1.30  | 1.25  | 1.33  | 1.31  | 1.28   | 1.34   | 1.35   | 1.29   | 1.34   | 1.27   | 1.33   | 1.25   | 1.34                      | 1.26                                  | 1.04 |
| 22       | 1.74                    | 1.72  | 1.74  | 1.71  | 1.74  | 1.71  | 1.71  | 1.75  | 1.76  | 1.72   | 1.70   | 1.75   | 1.72   | 1.76   | 1.69   | 1.72   | 1.71   | 1.73                      | 1.67                                  | 1.63 |
| 23       | 3.56                    | 3.55  | 3.47  | 3.44  | 3.54  | 3.54  | 4.65  | 3.50  | 3.46  | 4.16   | 4.66   | 3.61   | 4.17   | 3.68   | 3.51   | 3.46   | 3.44   | 3.61                      | 3.62                                  |      |
|          | 3.69                    | 3.68  | 3.99  | 3.99  | 4.00  | 3.97  | 3.40  | 4.13  | 3.68  | 3.30   | 3.44   | 3.71   | 3.30   | 3.76   | 4.16   | 3.68   | 4.00   | 3.77                      | 3.79                                  |      |
| 24       | 4.58                    | 4.58  | 5.34  | 5.33  | 5.15  | 5.16  | 5.32  | 5.25  | 4.53  | 4.97   | 5.31   | 4.61   | 4.98   | 4.62   | 5.24   | 4.52   | 5.29   | 4.87                      | 4.93                                  |      |
|          | 4.15                    | 4.17  | 4.71  | 4.70  | 4.43  | 4.42  | 4.58  | 4.65  | 4.17  | 4.62   | 4.59   | 4.12   | 4.61   | 4.18   | 4.65   | 4.18   | 4.68   | 4.35                      | 4.39                                  |      |
| 25       | 1.31                    | 1.33  | 0.86  | 0.86  | 0.87  | 0.88  | 0.84  | 0.85  | 1.37  | 1.32   | 0.83   | 1.30   | 1.29   | 1.37   | 0.85   | 1.35   | 0.84   | 1.14                      | 1.06                                  | 1.12 |
| 26       | 0.99                    | 1.03  | 0.89  | 0.92  | 0.89  | 0.94  | 0.91  | 0.92  | 1.06  | 1.01   | 0.86   | 0.98   | 0.95   | 1.03   | 0.87   | 1.02   | 0.92   | 0.97                      | 0.88                                  | 1.16 |
| 27       | 1.26                    | 1.26  | 1.22  | 1.24  | 1.20  | 1.22  | 1.23  | 1.24  | 1.27  | 1.25   | 1.20   | 1.25   | 1.22   | 1.26   | 1.25   | 1.27   | 1.25   | 1.24                      | 1.17                                  | 1.09 |
| 29       | 0.99                    | 0.99  | 0.99  | 0.99  | 0.99  | 0.99  | 0.98  | 0.96  | 0.98  | 0.97   | 1.01   | 0.99   | 0.97   | 0.99   | 0.99   | 1.00   | 0.99   | 0.99                      | 0.90                                  | 0.84 |
| 30       | 1.05                    | 1.00  | 1.05  | 1.02  | 1.05  | 1.02  | 1.02  | 1.00  | 1.02  | 1.01   | 1.06   | 1.05   | 1.04   | 1.06   | 1.06   | 1.03   | 1.02   | 1.03                      | 0.95                                  | 0.84 |
| HHDP 3   | 7.49                    | 7.49  | 7.74  | 7.73  | 7.75  | 7.74  | 7.81  | 7.62  | 7.74  | 7.62   | 7.81   | 7.14   | 7.61   | 7.22   | 7.62   | 7.71   | 7.67   | 7.59                      | 7.75                                  | 7.72 |
| HHDP 3'  | 7.35                    | 7.36  | 7.06  | 7.07  | 6.98  | 6.98  | 7.05  | 7.11  | 7.38  | 7.51   | 7.04   | 7.09   | 7.50   | 7.53   | 7.12   | 7.36   | 6.84   | 7.23                      | 7.38                                  | 7.08 |

<sup>a</sup> Calculated using the GIAO method at the mPWIPW91/6-311+G(2d,p) level in pyridine (PCM). <sup>b</sup> Measured in pyridine-d<sub>5</sub>. <sup>c</sup> Averaged according to the Boltzmann distribution theory at 298 K based on relative Gibbs free energies. <sup>d</sup> Linearly corrected for the experimental data.

Table S4. Calculated <sup>1</sup>H NMR chemical shifts of **4'oB**.

| Position | calculated <sup>a</sup> |       |       |       |       |       |       |       |       |        |        |        |        |        |        |        |        |        |        | experimental <sup>b</sup> |                                                    |      |
|----------|-------------------------|-------|-------|-------|-------|-------|-------|-------|-------|--------|--------|--------|--------|--------|--------|--------|--------|--------|--------|---------------------------|----------------------------------------------------|------|
|          | 4oB-1                   | 4oB-2 | 4oB-3 | 4oB-4 | 4oB-5 | 4oB-6 | 4oB-7 | 4oB-8 | 4oB-9 | 4oB-10 | 4oB-11 | 4oB-12 | 4oB-13 | 4oB-14 | 4oB-15 | 4oB-16 | 4oB-17 | 4oB-18 | 4oB-19 | averaged-4oB <sup>c</sup> | averaged-4oB <sup>c</sup> (corrected) <sup>d</sup> | 4o   |
| 1        | 2.29                    | 2.26  | 2.21  | 2.27  | 2.20  | 2.21  | 2.15  | 2.20  | 2.19  | 2.09   | 2.24   | 2.32   | 2.30   | 2.16   | 2.17   | 2.17   | 2.38   | 2.26   | 2.22   | 2.23                      | 2.18                                               | 2.02 |
|          | 1.19                    | 1.19  | 1.19  | 1.20  | 1.19  | 1.19  | 1.19  | 1.22  | 1.19  | 1.23   | 1.16   | 1.19   | 1.20   | 1.15   | 1.20   | 1.11   | 0.98   | 1.16   | 1.15   | 1.19                      | 1.15                                               | 1.16 |
| 2        | 4.62                    | 4.44  | 4.50  | 4.46  | 4.44  | 4.66  | 4.51  | 4.54  | 4.46  | 4.61   | 4.30   | 4.29   | 4.68   | 4.49   | 4.54   | 4.14   | 4.21   | 4.44   | 4.50   | 4.51                      | 4.43                                               | 4.17 |
| 3        | 5.17                    | 5.21  | 5.13  | 5.19  | 5.20  | 5.08  | 5.13  | 5.16  | 5.20  | 5.09   | 5.06   | 5.08   | 5.17   | 5.09   | 5.16   | 4.98   | 4.93   | 5.15   | 5.09   | 5.15                      | 5.07                                               | 5.82 |
| 5        | 1.12                    | 1.17  | 1.18  | 1.17  | 1.15  | 1.12  | 1.17  | 1.19  | 1.16  | 1.11   | 1.06   | 1.10   | 1.13   | 1.17   | 1.18   | 1.01   | 1.19   | 1.16   | 1.18   | 1.15                      | 1.12                                               | 1.97 |
| 6        | 1.63                    | 1.50  | 1.51  | 1.51  | 1.52  | 1.63  | 1.53  | 1.52  | 1.54  | 1.65   | 2.03   | 2.02   | 1.64   | 1.54   | 1.54   | 1.92   | 1.51   | 1.51   | 1.52   | 1.58                      | 1.54                                               | 1.66 |
|          | 1.21                    | 1.31  | 1.33  | 1.35  | 1.32  | 1.22  | 1.33  | 1.40  | 1.35  | 1.22   | 1.42   | 1.43   | 1.23   | 1.35   | 1.38   | 1.60   | 1.43   | 1.36   | 1.34   | 1.31                      | 1.27                                               | 1.34 |
| 7        | 1.68                    | 1.65  | 1.65  | 1.66  | 1.61  | 1.68  | 1.63  | 1.68  | 1.63  | 1.53   | 1.44   | 1.47   | 1.69   | 1.63   | 1.66   | 1.52   | 1.67   | 1.66   | 1.65   | 1.64                      | 1.60                                               | 1.59 |
|          | 1.43                    | 1.39  | 1.40  | 1.40  | 1.31  | 1.43  | 1.32  | 1.41  | 1.34  | 1.36   | 1.28   | 1.33   | 1.44   | 1.34   | 1.39   | 1.33   | 1.38   | 1.40   | 1.41   | 1.38                      | 1.35                                               | 1.30 |
| 9        | 1.83                    | 1.81  | 1.79  | 1.83  | 1.83  | 1.80  | 1.80  | 1.79  | 1.86  | 1.89   | 1.85   | 1.84   | 1.84   | 1.79   | 1.82   | 1.85   | 1.75   | 1.82   | 1.77   | 1.82                      | 1.78                                               | 1.73 |
| 11       | 2.19                    | 2.14  | 2.11  | 2.15  | 2.13  | 2.17  | 2.11  | 2.13  | 2.16  | 2.21   | 2.19   | 2.21   | 2.19   | 2.11   | 2.14   | 2.16   | 2.14   | 2.14   | 2.11   | 2.15                      | 2.10                                               | 1.89 |
| 12       | 5.90                    | 5.87  | 5.86  | 5.88  | 5.79  | 5.90  | 5.78  | 5.89  | 5.81  | 5.75   | 5.81   | 5.88   | 5.91   | 5.78   | 5.84   | 5.78   | 5.92   | 5.87   | 5.86   | 5.86                      | 5.76                                               | 5.34 |
| 15       | 1.70                    | 1.66  | 1.66  | 1.67  | 1.87  | 1.71  | 1.85  | 1.68  | 1.90  | 2.08   | 1.88   | 1.63   | 1.71   | 1.84   | 1.86   | 1.90   | 1.65   | 1.66   | 1.67   | 1.74                      | 1.70                                               | 2.27 |
|          | 1.19                    | 1.20  | 1.21  | 1.19  | 1.05  | 1.20  | 1.05  | 1.21  | 1.04  | 1.04   | 1.05   | 1.17   | 1.20   | 1.06   | 1.08   | 1.05   | 1.22   | 1.20   | 1.22   | 1.15                      | 1.12                                               | 1.05 |
| 16       | 2.15                    | 2.14  | 2.14  | 2.14  | 2.02  | 2.15  | 2.01  | 2.15  | 2.03  | 2.05   | 2.00   | 2.16   | 2.15   | 2.02   | 2.05   | 2.01   | 2.14   | 2.14   | 2.14   | 2.11                      | 2.06                                               | 1.97 |
|          | 1.80                    | 1.78  | 1.79  | 1.77  | 1.72  | 1.80  | 1.72  | 1.76  | 1.75  | 1.75   | 1.72   | 1.82   | 1.78   | 1.73   | 1.79   | 1.73   | 1.76   | 1.77   | 1.79   | 1.77                      | 1.73                                               | 1.89 |
| 18       | 3.23                    | 3.21  | 3.21  | 3.21  | 3.20  | 3.22  | 3.20  | 3.23  | 3.23  | 3.17   | 3.18   | 3.24   | 3.21   | 3.20   | 3.22   | 3.19   | 3.24   | 3.18   | 3.21   | 3.21                      | 3.15                                               | 3.13 |
| 19       | 2.15                    | 2.11  | 2.10  | 2.13  | 2.11  | 2.14  | 2.09  | 2.12  | 2.13  | 2.21   | 2.16   | 2.20   | 2.16   | 2.10   | 2.13   | 2.18   | 2.12   | 2.13   | 2.10   | 2.13                      | 2.08                                               | 1.63 |
|          | 1.19                    | 1.20  | 1.21  | 1.19  | 1.05  | 1.20  | 1.05  | 1.21  | 1.04  | 1.04   | 1.05   | 1.17   | 1.20   | 1.06   | 1.08   | 1.05   | 1.22   | 1.20   | 1.22   | 1.15                      | 1.12                                               | 1.16 |
| 21       | 1.53                    | 1.52  | 1.52  | 1.53  | 1.47  | 1.53  | 1.46  | 1.52  | 1.47  | 1.46   | 1.47   | 1.51   | 1.54   | 1.46   | 1.50   | 1.47   | 1.52   | 1.54   | 1.53   | 1.51                      | 1.47                                               | 1.30 |
|          | 1.30                    | 1.29  | 1.29  | 1.30  | 1.32  | 1.30  | 1.31  | 1.32  | 1.31  | 1.31   | 1.33   | 1.29   | 1.30   | 1.31   | 1.30   | 1.33   | 1.33   | 1.30   | 1.29   | 1.30                      | 1.27                                               | 1.04 |
| 22       | 1.69                    | 1.69  | 1.69  | 1.67  | 1.71  | 1.69  | 1.69  | 1.67  | 1.68  | 1.72   | 1.70   | 1.70   | 1.68   | 1.69   | 1.67   | 1.71   | 1.70   | 1.67   | 1.69   | 1.69                      | 1.65                                               | 1.63 |
| 23       | 3.20                    | 3.55  | 3.54  | 3.47  | 3.55  | 3.23  | 3.56  | 3.52  | 3.44  | 3.24   | 3.19   | 3.20   | 3.20   | 3.53   | 3.49   | 3.22   | 3.51   | 3.46   | 3.51   | 3.41                      | 3.35                                               |      |
|          | 4.48                    | 5.01  | 5.13  | 5.56  | 5.02  | 4.47  | 5.10  | 5.57  | 5.61  | 4.48   | 5.30   | 5.32   | 4.82   | 5.18   | 5.61   | 5.67   | 5.54   | 5.53   | 5.17   | 5.03                      | 4.95                                               |      |
| 24       | 3.74                    | 3.58  | 3.61  | 3.62  | 3.59  | 3.74  | 3.62  | 3.63  | 3.64  | 3.76   | 4.12   | 4.13   | 3.83   | 3.62   | 3.65   | 3.99   | 3.61   | 3.62   | 3.61   | 3.68                      | 3.61                                               |      |
|          | 3.70                    | 4.41  | 4.41  | 4.45  | 4.41  | 3.69  | 4.41  | 4.45  | 4.43  | 3.71   | 4.02   | 4.00   | 3.79   | 4.39   | 4.43   | 3.91   | 4.40   | 4.43   | 4.39   | 4.18                      | 4.11                                               |      |
| 25       | 1.48                    | 0.98  | 0.97  | 1.02  | 0.94  | 1.49  | 0.93  | 1.00  | 0.98  | 1.43   | 1.20   | 1.27   | 1.50   | 0.93   | 0.99   | 1.18   | 1.01   | 1.00   | 0.97   | 1.14                      | 1.10                                               | 1.12 |
| 26       | 1.05                    | 0.85  | 0.85  | 0.86  | 0.77  | 1.03  | 0.77  | 0.87  | 0.77  | 0.77   | 0.79   | 0.87   | 1.05   | 0.78   | 0.81   | 0.82   | 0.92   | 0.85   | 0.85   | 0.88                      | 0.85                                               | 1.16 |
| 27       | 1.24                    | 1.21  | 1.21  | 1.21  | 1.18  | 1.23  | 1.19  | 1.21  | 1.22  | 1.22   | 1.17   | 1.19   | 1.24   | 1.19   | 1.22   | 1.18   | 1.19   | 1.20   | 1.21   | 1.21                      | 1.18                                               | 1.09 |
| 29       | 0.98                    | 0.97  | 0.97  | 0.97  | 0.98  | 0.98  | 0.98  | 0.97  | 0.99  | 0.99   | 0.97   | 0.98   | 0.98   | 0.98   | 0.98   | 0.98   | 0.98   | 0.97   | 0.97   | 0.98                      | 0.95                                               | 0.84 |
| 30       | 1.02                    | 1.01  | 1.01  | 1.01  | 1.06  | 1.02  | 1.06  | 1.01  | 1.06  | 1.08   | 1.06   | 1.02   | 1.01   | 1.06   | 1.05   | 1.06   | 1.00   | 1.01   | 1.01   | 1.03                      | 1.00                                               | 0.84 |
| HHDP 3   | 7.71                    | 7.76  | 7.79  | 7.85  | 7.74  | 7.82  | 7.80  | 8.22  | 7.80  | 7.84   | 7.51   | 7.49   | 7.83   | 7.64   | 8.17   | 7.37   | 8.07   | 7.71   | 7.63   | 7.79                      | 7.67                                               | 7.72 |
| HHDP 3'  | 7.53                    | 7.58  | 7.62  | 7.57  | 7.59  | 7.54  | 7.63  | 7.57  | 7.57  | 7.54   | 7.51   | 7.50   | 7.36   | 7.58   | 7.58   | 8.13   | 7.59   | 7.41   | 7.56   | 7.57                      | 7.46                                               | 7.08 |

<sup>a</sup> Calculated using the GIAO method at the mPW1PW91/6-311+G(2d,p) level in pyridine (PCM). <sup>b</sup> Measured in pyridine-d<sub>5</sub>. <sup>c</sup> Averaged according to the Boltzmann distribution theory at 298 K based on relative Gibbs free energies. <sup>d</sup> Linearly corrected for the experimental data.

Table S5. Calculated  $^{13}\text{C}$  NMR chemical shifts of **4'oA**.

| Position | calculated <sup>a</sup> |       |       |       |       |       |       |       |       |        |        |        |        |        |        |        |        | averaged-<br>4oA <sup>c</sup> |       | averaged-<br>4oA<br>(corrected) <sup>d</sup> |  | experimental <sup>b</sup> |
|----------|-------------------------|-------|-------|-------|-------|-------|-------|-------|-------|--------|--------|--------|--------|--------|--------|--------|--------|-------------------------------|-------|----------------------------------------------|--|---------------------------|
|          | 4oA-1                   | 4oA-2 | 4oA-3 | 4oA-4 | 4oA-5 | 4oA-6 | 4oA-7 | 4oA-8 | 4oA-9 | 4oA-10 | 4oA-11 | 4oA-12 | 4oA-13 | 4oA-14 | 4oA-15 | 4oA-16 | 4oA-17 | 4oA                           | 4o    |                                              |  |                           |
| 1        | 45.5                    | 45.5  | 44.7  | 44.6  | 44.7  | 44.6  | 44.1  | 44.7  | 45.8  | 45.1   | 44.0   | 45.5   | 45.1   | 45.4   | 44.5   | 45.7   | 44.5   | 45.1                          | 46.8  | 48.3                                         |  |                           |
| 2        | 68.4                    | 68.4  | 67.7  | 67.6  | 67.4  | 67.4  | 67.5  | 68.2  | 67.3  | 67.6   | 67.6   | 68.4   | 67.6   | 68.3   | 68.1   | 67.3   | 67.4   | 68.0                          | 69.0  | 67.4                                         |  |                           |
| 3        | 77.4                    | 77.4  | 81.2  | 81.2  | 79.7  | 79.7  | 84.4  | 80.5  | 75.1  | 84.0   | 84.4   | 77.5   | 84.1   | 78.2   | 80.3   | 75.1   | 81.5   | 79.0                          | 79.7  | 79.1                                         |  |                           |
| 4        | 48.5                    | 48.5  | 50.4  | 50.2  | 49.6  | 49.7  | 47.8  | 49.7  | 48.6  | 48.7   | 47.9   | 48.5   | 48.7   | 48.6   | 49.9   | 48.5   | 50.1   | 49.0                          | 50.5  | 48.3                                         |  |                           |
| 5        | 44.0                    | 44.1  | 55.5  | 55.6  | 44.2  | 44.2  | 52.2  | 55.6  | 44.1  | 50.8   | 52.1   | 44.0   | 50.7   | 44.0   | 55.5   | 44.0   | 55.4   | 47.2                          | 48.8  | 47.0                                         |  |                           |
| 6        | 16.0                    | 16.0  | 16.9  | 16.9  | 15.7  | 15.6  | 16.7  | 16.8  | 16.3  | 16.9   | 16.7   | 16.0   | 16.9   | 16.0   | 16.8   | 16.3   | 16.9   | 16.2                          | 18.8  | 18.2                                         |  |                           |
| 7        | 30.0                    | 30.7  | 30.2  | 31.3  | 29.9  | 30.9  | 31.3  | 31.2  | 30.9  | 31.5   | 30.3   | 30.0   | 30.5   | 30.3   | 30.4   | 29.9   | 31.2   | 30.5                          | 32.6  | 32.7                                         |  |                           |
| 8        | 41.0                    | 40.7  | 40.2  | 40.1  | 40.5  | 40.2  | 40.2  | 40.3  | 40.7  | 40.7   | 39.9   | 41.1   | 40.6   | 41.0   | 40.1   | 40.7   | 40.1   | 40.6                          | 42.4  | 39.9                                         |  |                           |
| 9        | 45.1                    | 45.2  | 45.8  | 45.8  | 45.9  | 45.9  | 45.7  | 45.9  | 45.3  | 45.5   | 45.7   | 44.9   | 45.5   | 45.0   | 45.9   | 45.3   | 45.7   | 45.4                          | 47.1  | 47.5                                         |  |                           |
| 10       | 39.1                    | 39.2  | 39.0  | 39.0  | 38.5  | 38.7  | 38.6  | 39.0  | 38.9  | 39.9   | 38.6   | 39.2   | 39.8   | 39.3   | 39.1   | 38.6   | 38.9   | 39.0                          | 40.9  | 37.7                                         |  |                           |
| 11       | 22.4                    | 22.3  | 22.4  | 22.4  | 22.4  | 22.4  | 22.4  | 22.4  | 22.2  | 22.3   | 22.0   | 22.4   | 22.4   | 22.0   | 22.4   | 22.4   | 22.4   | 22.4                          | 24.7  | 24.0                                         |  |                           |
| 12       | 127.4                   | 127.8 | 127.0 | 127.3 | 127.2 | 127.4 | 127.4 | 127.6 | 127.8 | 127.9  | 127.0  | 127.3  | 127.5  | 127.6  | 126.7  | 127.5  | 127.3  | 127.4                         | 126.6 | 122.7                                        |  |                           |
| 13       | 150.5                   | 149.6 | 150.5 | 149.6 | 150.4 | 149.6 | 149.5 | 149.9 | 149.9 | 150.3  | 150.8  | 150.6  | 150.6  | 150.5  | 150.2  | 149.7  | 150.1  | 148.6                         | 144.1 | 144.1                                        |  |                           |
| 14       | 42.9                    | 43.7  | 43.6  | 43.8  | 43.7  | 44.1  | 43.7  | 43.7  | 44.2  | 43.9   | 43.7   | 42.8   | 43.3   | 43.4   | 43.5   | 43.4   | 43.7   | 43.5                          | 45.2  | 42.2                                         |  |                           |
| 15       | 24.8                    | 25.5  | 24.3  | 25.3  | 24.3  | 25.4  | 25.4  | 25.2  | 25.0  | 25.3   | 24.4   | 24.7   | 24.4   | 24.6   | 24.5   | 24.6   | 25.4   | 25.0                          | 27.2  | 28.1                                         |  |                           |
| 16       | 20.7                    | 21.3  | 20.6  | 21.4  | 20.6  | 21.5  | 21.4  | 21.3  | 21.4  | 21.5   | 20.7   | 20.7   | 20.7   | 20.7   | 20.8   | 20.8   | 21.4   | 21.0                          | 23.4  | 23.4                                         |  |                           |
| 17       | 48.7                    | 48.2  | 48.6  | 48.0  | 48.6  | 47.9  | 47.8  | 48.4  | 48.4  | 48.1   | 48.0   | 48.5   | 48.5   | 48.6   | 48.2   | 49.2   | 48.0   | 48.4                          | 49.9  | 47.0                                         |  |                           |
| 18       | 41.5                    | 41.1  | 41.2  | 41.2  | 41.3  | 41.0  | 41.1  | 41.1  | 41.3  | 41.2   | 41.3   | 41.4   | 41.6   | 41.6   | 41.5   | 41.4   | 41.2   | 41.3                          | 43.1  | 41.7                                         |  |                           |
| 19       | 43.1                    | 43.2  | 43.8  | 42.9  | 43.8  | 43.1  | 43.0  | 42.9  | 42.8  | 42.9   | 43.6   | 43.0   | 42.8   | 43.0   | 43.0   | 43.4   | 42.9   | 43.2                          | 44.9  | 46.1                                         |  |                           |
| 20       | 31.4                    | 31.1  | 31.2  | 31.2  | 31.1  | 31.1  | 31.1  | 31.8  | 31.3  | 31.1   | 31.1   | 31.4   | 31.0   | 31.1   | 31.3   | 31.1   | 31.1   | 31.2                          | 33.3  | 30.7                                         |  |                           |
| 21       | 31.1                    | 31.3  | 30.8  | 31.5  | 30.8  | 31.3  | 31.6  | 31.7  | 31.4  | 31.4   | 30.8   | 31.1   | 31.1   | 31.2   | 31.1   | 30.9   | 31.5   | 31.2                          | 33.2  | 33.9                                         |  |                           |
| 22       | 31.0                    | 30.7  | 31.1  | 31.0  | 31.1  | 30.8  | 30.8  | 30.8  | 31.0  | 30.7   | 31.0   | 31.0   | 30.9   | 31.0   | 31.1   | 31.0   | 30.9   | 30.9                          | 33.0  | 33.0                                         |  |                           |
| 23       | 60.1                    | 60.1  | 69.0  | 69.0  | 56.8  | 56.8  | 71.2  | 68.9  | 60.0  | 73.4   | 71.2   | 60.2   | 73.5   | 60.3   | 68.9   | 60.0   | 69.3   | 62.7                          | 63.8  | 62.2                                         |  |                           |
| 24       | 60.3                    | 60.4  | 71.2  | 71.4  | 70.4  | 70.4  | 72.9  | 70.1  | 60.9  | 62.1   | 72.9   | 59.9   | 62.2   | 59.8   | 70.0   | 60.9   | 71.4   | 64.7                          | 65.7  | 62.4                                         |  |                           |
| 25       | 10.3                    | 10.3  | 11.3  | 11.3  | 11.5  | 11.5  | 10.8  | 11.2  | 10.3  | 10.9   | 11.0   | 10.4   | 10.9   | 10.5   | 11.3   | 10.3   | 11.2   | 10.7                          | 13.4  | 17.5                                         |  |                           |
| 26       | 12.6                    | 13.3  | 12.5  | 13.2  | 12.5  | 13.2  | 13.3  | 13.3  | 13.7  | 13.6   | 12.4   | 12.5   | 12.7   | 12.8   | 12.3   | 12.9   | 13.2   | 12.9                          | 15.6  | 17.7                                         |  |                           |
| 27       | 20.9                    | 20.4  | 20.7  | 20.2  | 20.7  | 20.2  | 20.1  | 20.1  | 20.5  | 20.3   | 20.6   | 21.0   | 20.8   | 20.7   | 20.8   | 20.9   | 20.2   | 20.6                          | 23.0  | 25.9                                         |  |                           |
| 28       | 184.0                   | 183.9 | 183.9 | 183.8 | 183.9 | 183.9 | 183.8 | 183.9 | 184.0 | 183.7  | 183.8  | 184.0  | 183.7  | 183.9  | 183.7  | 184.0  | 183.8  | 183.9                         | 181.4 | 176.4                                        |  |                           |
| 29       | 28.5                    | 28.5  | 28.6  | 28.3  | 28.6  | 28.4  | 28.2  | 28.3  | 28.3  | 28.3   | 28.6   | 28.4   | 28.3   | 28.4   | 28.3   | 28.4   | 28.3   | 28.4                          | 30.6  | 33.0                                         |  |                           |
| 30       | 18.7                    | 18.6  | 18.7  | 18.6  | 18.7  | 18.6  | 18.6  | 18.6  | 18.6  | 18.6   | 18.7   | 18.7   | 18.7   | 18.7   | 18.7   | 18.6   | 18.6   | 18.6                          | 21.1  | 23.6                                         |  |                           |
| HHDP-1   | 110.5                   | 110.5 | 116.8 | 116.6 | 116.8 | 116.6 | 116.5 | 113.9 | 111.3 | 110.4  | 116.7  | 117.3  | 110.3  | 117.5  | 114.1  | 111.2  | 120.7  | 113.2                         | 112.8 | 118.4                                        |  |                           |
| HHDP-1'  | 109.3                   | 109.1 | 116.0 | 116.1 | 115.8 | 115.9 | 115.9 | 116.6 | 110.3 | 110.4  | 116.0  | 116.9  | 110.3  | 119.4  | 116.5  | 110.1  | 118.6  | 112.4                         | 112.0 | 118.0                                        |  |                           |
| HHDP-2   | 128.0                   | 128.0 | 125.5 | 125.5 | 125.8 | 125.9 | 126.1 | 124.6 | 126.9 | 127.5  | 126.0  | 126.5  | 127.5  | 127.1  | 124.5  | 127.0  | 125.0  | 126.9                         | 126.1 |                                              |  |                           |
| HHDP-2'  | 131.2                   | 131.2 | 124.7 | 124.5 | 125.1 | 124.8 | 124.3 | 123.7 | 131.7 | 129.8  | 124.7  | 129.4  | 129.6  | 128.9  | 124.1  | 131.8  | 124.7  | 128.5                         | 127.6 |                                              |  |                           |
| HHDP-3   | 111.7                   | 111.7 | 113.3 | 113.4 | 113.0 | 113.2 | 113.7 | 110.7 | 113.3 | 113.7  | 107.2  | 113.2  | 110.0  | 110.5  | 113.3  | 112.5  | 112.2  | 111.9                         |       | 112.1                                        |  |                           |
| HHDP-3'  | 107.5                   | 107.5 | 104.3 | 104.3 | 104.0 | 104.0 | 104.0 | 106.9 | 107.3 | 108.7  | 104.2  | 104.0  | 108.7  | 110.0  | 106.9  | 107.3  | 101.7  | 106.3                         | 106.1 | 106.6                                        |  |                           |
| HHDP-4   | 146.6                   | 146.6 | 146.6 | 147.1 | 146.6 | 147.0 | 147.1 | 144.0 | 146.3 | 146.5  | 146.7  | 143.1  | 146.6  | 143.1  | 143.9  | 146.3  | 145.9  | 146.4                         | 145.0 | 145.7                                        |  |                           |
| HHDP-4'  | 147.3                   | 147.2 | 145.8 | 145.9 | 145.8 | 145.9 | 145.9 | 145.3 | 146.8 | 147.1  | 145.8  | 143.4  | 147.1  | 145.6  | 145.1  | 147.0  | 143.2  | 146.5                         | 145.1 | 145.9                                        |  |                           |
| HHDP-5   | 135.9                   | 136.0 | 141.1 | 141.8 | 141.1 | 141.5 | 141.7 | 137.2 | 136.4 | 136.7  | 141.0  | 135.8  | 136.8  | 135.7  | 137.2  | 136.3  | 140.9  | 137.9                         | 136.8 | 139.8                                        |  |                           |
| HHDP-5'  | 135.6                   | 135.5 | 135.0 | 135.5 | 134.7 | 135.4 | 135.4 | 135.4 | 134.6 | 136.2  | 135.0  | 135.2  | 136.3  | 140.0  | 134.8  | 134.9  | 135.5  | 135.5                         | 134.4 | 137.7                                        |  |                           |
| HHDP-6   | 143.2                   | 143.3 | 146.0 | 146.1 | 146.1 | 146.2 | 146.0 | 146.2 | 143.0 | 143.3  | 145.8  | 146.6  | 143.4  | 143.3  | 146.1  | 142.8  | 144.5  | 144.4                         | 143.1 | 147.1                                        |  |                           |
| HHDP-6'  | 144.0                   | 143.9 | 143.9 | 143.7 | 143.8 | 144.1 | 143.6 | 143.7 | 143.0 | 143.6  | 143.6  | 146.5  | 143.6  | 143.7  | 143.5  | 143.3  | 146.9  | 143.9                         | 142.6 | 146.9                                        |  |                           |
| HHDP-7   | 173.6                   | 173.7 | 174.3 | 174.4 | 174.7 | 174.7 | 175.0 | 173.6 | 170.9 | 174.6  | 174.9  | 175.4  | 174.8  | 174.7  | 173.7  | 171.0  | 175.7  | 174.0                         | 171.8 | 168.9                                        |  |                           |
| HHDP-7'  | 173.9                   | 173.9 | 178.5 | 178.6 | 179.3 | 179.2 | 179.1 | 174.4 | 174.0 | 175.8  | 179.0  | 174.1  | 175.8  | 173.8  | 174.3  | 174.0  | 178.1  | 175.8                         | 173.5 | 170.7                                        |  |                           |

<sup>a</sup> Calculated using the GIAO method at the mPW1PW91/6-311+G(2d,p) level in pyridine (PCM). <sup>b</sup> Measured in pyridine-*d*<sub>5</sub>. <sup>c</sup> Averaged according to the Boltzmann distribution theory at 298 K based on relative Gibbs free energies. <sup>d</sup> Linearly corrected for the experimental data.

Table S6. Calculated  $^{13}\text{C}$  NMR chemical shifts of **4'oB**.

| Position | calculated <sup>a</sup> |       |       |       |       |       |       |       |       |        |        |        |        |        |        |        |        |        |        | experimental <sup>b</sup> |                                       |       |
|----------|-------------------------|-------|-------|-------|-------|-------|-------|-------|-------|--------|--------|--------|--------|--------|--------|--------|--------|--------|--------|---------------------------|---------------------------------------|-------|
|          | 4oB-1                   | 4oB-2 | 4oB-3 | 4oB-4 | 4oB-5 | 4oB-6 | 4oB-7 | 4oB-8 | 4oB-9 | 4oB-10 | 4oB-11 | 4oB-12 | 4oB-13 | 4oB-14 | 4oB-15 | 4oB-16 | 4oB-17 | 4oB-18 | 4oB-19 | averaged-4oB <sup>c</sup> | averaged-4oB (corrected) <sup>d</sup> | 4o    |
| 1        | 42.1                    | 41.4  | 44.3  | 41.2  | 41.3  | 45.1  | 44.2  | 44.8  | 41.0  | 45.1   | 41.8   | 42.0   | 42.1   | 44.3   | 44.6   | 40.7   | 44.6   | 41.3   | 44.5   | 42.8                      | 43.9                                  | 48.3  |
| 2        | 68.7                    | 67.5  | 67.7  | 67.5  | 67.5  | 69.0  | 67.7  | 67.9  | 67.5  | 68.7   | 67.5   | 67.6   | 68.6   | 68.0   | 67.9   | 67.7   | 68.7   | 67.6   | 67.9   | 68.0                      | 68.4                                  | 67.4  |
| 3        | 92.7                    | 91.2  | 88.5  | 90.1  | 91.4  | 89.4  | 88.6  | 87.2  | 90.2  | 89.4   | 90.4   | 90.4   | 91.3   | 88.5   | 87.2   | 89.0   | 89.6   | 89.8   | 88.3   | 90.2                      | 90.0                                  | 79.1  |
| 4        | 48.7                    | 47.7  | 47.5  | 47.6  | 47.6  | 48.6  | 47.4  | 47.7  | 47.4  | 48.6   | 47.2   | 47.4   | 48.1   | 47.4   | 47.6   | 47.9   | 48.7   | 47.5   | 47.5   | 47.9                      | 48.9                                  | 48.3  |
| 5        | 51.8                    | 53.1  | 52.4  | 52.9  | 52.7  | 51.5  | 52.2  | 52.3  | 52.8  | 51.2   | 52.4   | 52.8   | 51.6   | 52.2   | 52.4   | 51.8   | 52.2   | 52.9   | 52.5   | 52.3                      | 53.2                                  | 47.0  |
| 6        | 18.3                    | 17.1  | 17.2  | 17.1  | 17.2  | 18.4  | 17.3  | 17.1  | 17.0  | 18.7   | 19.6   | 19.7   | 18.0   | 17.2   | 17.1   | 19.8   | 17.2   | 17.0   | 17.2   | 17.6                      | 19.5                                  | 18.2  |
| 7        | 31.6                    | 31.3  | 31.2  | 31.4  | 29.8  | 31.6  | 29.9  | 31.4  | 29.8  | 28.8   | 30.2   | 31.5   | 31.6   | 29.9   | 30.4   | 30.1   | 31.4   | 31.4   | 31.2   | 30.9                      | 32.4                                  | 32.7  |
| 8        | 40.9                    | 40.4  | 40.4  | 40.5  | 40.0  | 40.9  | 40.1  | 40.5  | 40.4  | 40.8   | 40.0   | 40.1   | 40.9   | 40.2   | 40.6   | 40.0   | 40.3   | 40.6   | 40.5   | 40.5                      | 41.7                                  | 39.9  |
| 9        | 45.3                    | 46.5  | 46.2  | 46.6  | 46.4  | 45.2  | 46.2  | 46.4  | 46.6  | 45.7   | 46.7   | 46.7   | 45.4   | 46.2   | 46.3   | 47.0   | 46.2   | 46.6   | 46.3   | 46.1                      | 47.1                                  | 47.5  |
| 10       | 38.4                    | 38.6  | 38.3  | 38.5  | 38.5  | 38.2  | 38.3  | 38.2  | 38.5  | 38.0   | 38.3   | 38.6   | 38.5   | 38.2   | 38.1   | 38.8   | 38.8   | 38.6   | 38.3   | 38.4                      | 39.6                                  | 37.7  |
| 11       | 22.7                    | 22.5  | 22.4  | 22.5  | 22.5  | 22.7  | 22.5  | 22.4  | 22.6  | 22.9   | 22.4   | 22.3   | 22.7   | 22.5   | 22.6   | 22.3   | 22.2   | 22.5   | 22.4   | 22.6                      | 24.2                                  | 24.0  |
| 12       | 127.6                   | 127.1 | 127.0 | 127.4 | 126.6 | 127.5 | 126.6 | 127.5 | 126.9 | 127.0  | 126.8  | 127.1  | 127.9  | 126.5  | 127.1  | 126.6  | 127.4  | 127.3  | 127.0  | 127.2                     | 125.9                                 | 122.7 |
| 13       | 149.6                   | 149.3 | 149.5 | 149.5 | 150.3 | 149.6 | 150.3 | 149.6 | 150.2 | 150.8  | 150.2  | 149.5  | 149.6  | 150.3  | 150.2  | 150.4  | 149.9  | 149.6  | 149.5  | 149.8                     | 147.9                                 | 144.1 |
| 14       | 43.8                    | 43.4  | 43.3  | 43.5  | 42.6  | 43.8  | 42.8  | 43.5  | 42.8  | 42.7   | 42.3   | 43.1   | 44.0   | 42.9   | 43.1   | 42.5   | 43.6   | 43.5   | 43.3   | 43.3                      | 44.4                                  | 42.2  |
| 15       | 25.5                    | 25.7  | 25.6  | 25.7  | 24.6  | 25.5  | 24.6  | 25.6  | 24.6  | 24.7   | 24.7   | 25.3   | 25.5   | 24.6   | 24.5   | 25.5   | 25.6   | 25.6   | 25.6   | 25.3                      | 26.9                                  | 28.1  |
| 16       | 21.6                    | 21.6  | 21.6  | 21.6  | 20.5  | 21.6  | 20.6  | 21.5  | 20.7  | 20.4   | 20.4   | 21.3   | 21.5   | 20.6   | 20.8   | 20.5   | 21.5   | 21.5   | 21.6   | 21.3                      | 23.0                                  | 23.4  |
| 17       | 48.1                    | 47.9  | 47.9  | 47.6  | 48.3  | 48.1  | 48.2  | 47.5  | 48.1  | 47.8   | 48.1   | 47.8   | 48.2   | 47.9   | 48.3   | 47.4   | 47.6   | 47.9   | 48.0   | 49.0                      | 47.0                                  | 47.0  |
| 18       | 41.3                    | 41.0  | 41.0  | 41.2  | 41.3  | 41.2  | 41.3  | 41.2  | 41.3  | 41.5   | 41.3   | 40.9   | 41.4   | 41.3   | 41.4   | 41.3   | 41.2   | 41.1   | 41.0   | 41.2                      | 42.4                                  | 41.7  |
| 19       | 42.8                    | 43.0  | 43.0  | 43.2  | 43.0  | 42.8  | 42.9  | 43.3  | 42.8  | 42.6   | 43.3   | 43.0   | 43.0   | 42.9   | 43.0   | 43.2   | 43.4   | 43.2   | 43.0   | 43.0                      | 44.1                                  | 46.1  |
| 20       | 31.6                    | 31.7  | 31.7  | 31.4  | 31.5  | 31.6  | 31.6  | 31.2  | 31.8  | 31.9   | 31.4   | 31.8   | 31.4   | 31.7   | 31.7   | 31.4   | 31.2   | 31.4   | 31.7   | 31.6                      | 33.0                                  | 30.7  |
| 21       | 31.4                    | 31.4  | 31.3  | 31.3  | 30.9  | 31.3  | 31.0  | 31.3  | 30.9  | 30.8   | 30.9   | 31.4   | 31.4   | 31.0   | 31.0   | 30.9   | 31.4   | 31.3   | 31.3   | 31.2                      | 32.7                                  | 33.9  |
| 22       | 30.7                    | 30.7  | 30.7  | 30.9  | 30.9  | 30.7  | 30.9  | 30.9  | 30.9  | 31.0   | 31.1   | 30.8   | 30.9   | 30.9   | 30.7   | 31.0   | 30.7   | 30.9   | 30.7   | 30.8                      | 32.3                                  | 33.0  |
| 23       | 71.0                    | 73.4  | 72.8  | 72.9  | 73.4  | 71.0  | 72.9  | 73.0  | 72.7  | 71.0   | 68.6   | 68.6   | 71.3   | 72.4   | 72.8   | 68.8   | 73.3   | 72.6   | 72.3   | 72.2                      | 72.5                                  | 62.2  |
| 24       | 58.3                    | 63.4  | 63.4  | 63.8  | 63.4  | 58.3  | 63.4  | 63.8  | 63.8  | 58.3   | 59.3   | 59.4   | 58.7   | 63.4   | 63.8   | 56.3   | 63.4   | 63.7   | 63.4   | 61.7                      | 62.3                                  | 62.4  |
| 25       | 10.6                    | 11.8  | 11.6  | 11.9  | 11.7  | 10.4  | 11.5  | 11.7  | 11.9  | 10.3   | 10.8   | 11.0   | 10.4   | 11.5   | 11.7   | 11.7   | 11.6   | 11.8   | 11.6   | 11.3                      | 13.3                                  | 17.5  |
| 26       | 13.6                    | 12.6  | 12.6  | 12.5  | 11.4  | 13.5  | 11.6  | 12.6  | 11.5  | 12.0   | 10.8   | 12.2   | 13.5   | 11.7   | 11.8   | 11.3   | 12.9   | 12.5   | 12.6   | 12.5                      | 14.5                                  | 17.7  |
| 27       | 20.0                    | 20.1  | 20.2  | 20.3  | 20.7  | 20.0  | 20.7  | 20.3  | 21.0  | 22.2   | 20.7   | 20.1   | 20.2   | 20.7   | 20.8   | 20.8   | 20.4   | 20.3   | 20.2   | 20.4                      | 22.1                                  | 25.9  |
| 28       | 183.8                   | 183.8 | 183.8 | 183.6 | 183.5 | 183.8 | 183.4 | 183.7 | 183.6 | 183.9  | 183.5  | 183.8  | 183.7  | 183.4  | 183.6  | 183.4  | 183.8  | 183.7  | 183.8  | 183.7                     | 180.8                                 | 176.4 |
| 29       | 28.3                    | 28.3  | 28.3  | 28.3  | 28.3  | 28.3  | 28.3  | 28.3  | 28.3  | 28.3   | 28.3   | 28.3   | 28.3   | 28.3   | 28.3   | 28.3   | 28.3   | 28.3   | 28.3   | 28.3                      | 29.8                                  | 33.0  |
| 30       | 18.7                    | 18.7  | 18.7  | 18.6  | 18.8  | 18.7  | 18.8  | 18.8  | 18.8  | 18.9   | 18.8   | 18.7   | 18.6   | 18.8   | 18.8   | 18.8   | 18.6   | 18.6   | 18.7   | 18.7                      | 20.5                                  | 23.6  |
| HHDP-1   | 114.2                   | 114.3 | 114.0 | 116.2 | 114.4 | 113.9 | 114.2 | 115.9 | 115.9 | 114.5  | 113.9  | 114.1  | 115.4  | 117.3  | 115.7  | 114.6  | 116.2  | 119.2  | 117.4  | 114.8                     | 113.9                                 | 118.0 |
| HHDP-1'  | 115.8                   | 115.5 | 116.1 | 113.4 | 115.5 | 116.0 | 115.9 | 113.6 | 113.5 | 116.0  | 115.9  | 115.9  | 113.3  | 120.3  | 113.6  | 117.7  | 113.5  | 118.0  | 120.3  | 115.4                     | 114.5                                 | 118.4 |
| HHDP-2   | 126.2                   | 126.6 | 127.3 | 123.8 | 126.4 | 126.5 | 127.0 | 124.2 | 123.8 | 126.3  | 126.8  | 127.1  | 124.6  | 127.1  | 124.2  | 127.8  | 123.9  | 124.0  | 127.2  | 126.0                     | 124.8                                 |       |
| HHDP-2'  | 127.9                   | 128.1 | 127.9 | 125.8 | 128.0 | 127.9 | 128.0 | 126.0 | 125.6 | 127.9  | 128.6  | 128.5  | 126.6  | 127.0  | 125.8  | 119.6  | 125.8  | 124.1  | 126.9  | 127.3                     | 126.0                                 |       |
| HHDP-3   | 107.0                   | 107.3 | 107.2 | 108.7 | 107.2 | 107.2 | 107.2 | 109.4 | 108.5 | 107.0  | 106.4  | 106.2  | 108.6  | 104.8  | 109.1  | 106.8  | 108.9  | 106.1  | 105.0  | 107.5                     | 106.8                                 | 106.6 |
| HHDP-3'  | 111.8                   | 112.4 | 112.5 | 110.4 | 112.4 | 111.8 | 112.5 | 110.2 | 110.6 | 111.8  | 111.2  | 111.2  | 109.2  | 111.6  | 110.5  | 113.4  | 110.5  | 108.8  | 111.6  | 111.6                     | 110.8                                 | 112.1 |
| HHDP-4   | 145.7                   | 146.0 | 145.7 | 145.0 | 145.8 | 145.6 | 145.7 | 145.0 | 144.9 | 145.4  | 145.8  | 145.7  | 144.9  | 143.1  | 144.9  | 142.8  | 144.8  | 142.4  | 143.1  | 145.4                     | 143.6                                 | 145.7 |
| HHDP-4'  | 147.2                   | 147.1 | 146.9 | 143.8 | 147.1 | 147.1 | 147.0 | 143.6 | 144.1 | 147.3  | 147.0  | 144.1  | 145.8  | 143.9  | 145.7  | 143.6  | 143.4  | 145.8  | 146.2  | 144.4                     | 145.9                                 |       |
| HHDP-5   | 134.6                   | 134.8 | 134.2 | 135.6 | 134.8 | 134.2 | 134.2 | 135.0 | 135.5 | 134.1  | 134.5  | 134.7  | 135.1  | 134.0  | 135.0  | 134.3  | 135.1  | 135.5  | 134.2  | 134.7                     | 133.2                                 | 137.7 |
| HHDP-5'  | 140.1                   | 139.9 | 140.1 | 136.6 | 140.0 | 140.2 | 140.2 | 136.4 | 136.8 | 140.6  | 139.6  | 139.7  | 136.5  | 139.9  | 136.7  | 138.5  | 136.4  | 136.5  | 139.8  | 139.2                     | 137.6                                 | 139.8 |
| HHDP-6   | 143.3                   | 143.2 | 142.7 | 143.5 | 143.2 | 142.9 | 142.7 | 143.1 | 143.3 | 143.4  | 143.3  | 143.8  | 143.5  | 145.3  | 143.0  | 145.5  | 143.2  | 146.3  | 145.5  | 143.3                     | 141.6                                 | 146.9 |
| HHDP-6'  | 145.6                   | 145.5 | 145.5 | 145.3 | 145.6 | 145.6 | 145.7 | 145.4 | 145.4 | 146.0  | 145.6  | 145.5  | 145.8  | 144.3  | 145.4  | 143.2  | 145.2  | 145.6  | 144.3  | 145.5                     | 143.7                                 | 147.1 |
| HHDP-7   | 178.1                   | 178.1 | 178.9 | 174.3 | 178.1 | 178.6 | 178.9 | 174.4 | 174.2 | 178.5  | 178.4  | 178.3  | 173.5  | 178.5  | 174.4  | 172.5  | 175.1  | 174.0  | 178.5  | 177.3                     | 174.6                                 | 170.7 |
| HHDP-7'  | 171.4                   | 170.6 | 170.1 | 170.6 | 171.3 | 170.4 | 170.3 | 170.3 | 171.3 | 171.7  | 171.6  | 171.4  | 170.7  | 170.2  | 171.0  | 170.5  | 170.6  | 170.7  | 170.7  | 168.3                     | 168.9                                 |       |

<sup>a</sup> Calculated using the GIAO method at the mPW1PW91/6-311+G(2d,p) level in pyridine (PCM). <sup>b</sup> Measured in pyridine-*d*<sub>5</sub>. <sup>c</sup> Averaged according to the Boltzmann distribution theory at 298 K based on relative Gibbs free energies. <sup>d</sup> Linearly corrected for the experimental data.

Figure S46. Correlation plots of experimental  $^1\text{H}$  NMR chemical shifts versus corresponding calculated  $^1\text{H}$  NMR chemical shifts of **4'o**.

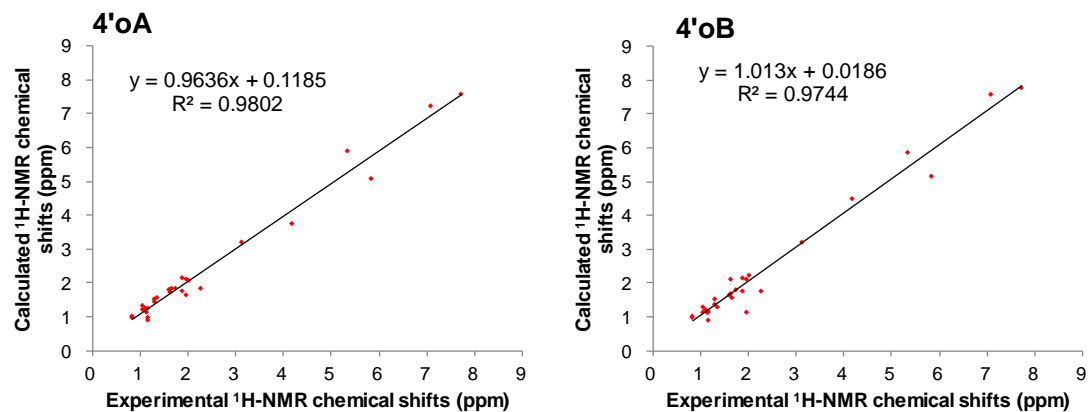

Figure S47. Correlation plots of experimental  $^{13}\text{C}$  NMR chemical shifts versus corresponding calculated  $^{13}\text{C}$  NMR chemical shifts of **4'o**.

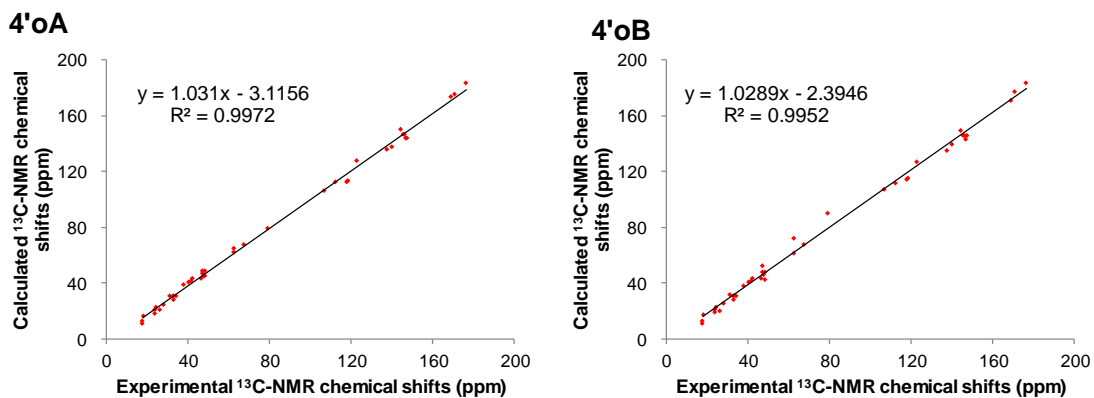

Table S7. The DP4+ probability analysis of **4'o**.

|                                           | <b>4'oA</b> | <b>4'oB</b> |
|-------------------------------------------|-------------|-------------|
| sDP4+ ( <sup>1</sup> H)                   | 48.77%      | 51.23%      |
| sDP4+ ( <sup>13</sup> C)                  | 100.00%     | 0.00%       |
| sDP4+ ( <sup>1</sup> H + <sup>13</sup> C) | 100.00%     | 0.00%       |
| uDP4+ ( <sup>1</sup> H)                   | 0.58%       | 99.42%      |
| uDP4+ ( <sup>13</sup> C)                  | 99.90%      | 0.10%       |
| uDP4+ ( <sup>1</sup> H + <sup>13</sup> C) | 85.66%      | 14.34%      |
| DP4+ ( <sup>1</sup> H)                    | 0.55%       | 99.45%      |
| DP4+ ( <sup>13</sup> C)                   | 100.00%     | 0.00%       |
| DP4+ ( <sup>1</sup> H + <sup>13</sup> C)  | 100.00%     | 0.00%       |

Cartesian coordinates of the lowest-energy conformer of **4'oA (4'oA-1)** at the B3LYP/6-31G(d,p) level in pyridine (PCM).

|   |             |             |             |
|---|-------------|-------------|-------------|
| C | 1.50017600  | 0.42996600  | 1.09983100  |
| C | 1.93986700  | -0.84574500 | 0.38158400  |
| C | 1.30883400  | -1.09715400 | -1.01920800 |
| C | -0.24758100 | -0.95309100 | -0.85650800 |
| C | -0.75792700 | 0.35462500  | -0.16542300 |
| C | -0.02803900 | 0.47625300  | 1.20080500  |
| C | -1.05354800 | -1.24658100 | -2.13403400 |
| C | -2.51799100 | -1.53565100 | -1.77671300 |
| C | -3.22262900 | -0.38821800 | -1.00830800 |
| C | -2.29724900 | 0.14041200  | 0.14474500  |
| C | -0.45262200 | 1.63360600  | -0.98196700 |
| C | -4.58194200 | -0.91318700 | -0.32429100 |
| C | -5.21297900 | 0.24060400  | 0.48013000  |
| C | -4.44823300 | 1.21135500  | 0.99879100  |
| C | -2.95999400 | 1.34753500  | 0.83722000  |
| C | -5.56246900 | -1.44622600 | -1.41345600 |
| C | -7.03512300 | -1.52514100 | -0.98388900 |
| C | -7.56358800 | -0.17360400 | -0.46365900 |
| C | -6.71793300 | 0.27375000  | 0.76454200  |
| C | -9.07979200 | -0.24770300 | -0.09564800 |
| C | -9.37533900 | -1.03401400 | 1.18674300  |
| C | -8.58661600 | -0.52173400 | 2.41249700  |
| C | -7.08396200 | -0.52357700 | 2.04543800  |
| C | -3.54704200 | 0.73394300  | -2.02973000 |
| C | -9.06001400 | 0.88501900  | 2.83183700  |
| C | -8.81205000 | -1.47986400 | 3.59616000  |
| C | -4.33091300 | -2.09395800 | 0.66178000  |
| C | 6.26093400  | -2.65438200 | 0.93068600  |
| C | 5.59315000  | -1.43659100 | 0.75646900  |
| C | 6.24469400  | -0.32690300 | 0.15748800  |
| C | 7.56218300  | -0.52889400 | -0.29379300 |
| C | 8.21538500  | -1.75786900 | -0.15134100 |
| C | 7.56728200  | -2.82344100 | 0.47774900  |
| C | 5.73141300  | 1.08439000  | 0.10751300  |
| C | 4.75885400  | 1.59105400  | -0.78534600 |
| C | 4.36009200  | 2.92970200  | -0.74622800 |
| C | 4.93965100  | 3.80994300  | 0.16582000  |
| C | 5.89458500  | 3.33401700  | 1.06817500  |
| C | 6.27331100  | 1.98833000  | 1.04339600  |
| O | 8.31818600  | 0.44356200  | -0.88673900 |
| O | 7.19806600  | 1.64889200  | 1.99021600  |
| O | 6.41856800  | 4.22154500  | 1.96359800  |
| O | 4.56449600  | 5.11694200  | 0.18413600  |
| C | 4.08887900  | 0.65642600  | -1.73343200 |
| O | 2.74246600  | 0.84896300  | -1.71524500 |
| O | 4.65045100  | -0.18129500 | -2.40847800 |
| C | 4.15459700  | -1.45174400 | 1.16839800  |
| O | 3.72354100  | -2.02220900 | 2.15547500  |
| C | 1.65411300  | -2.56093600 | -1.40562900 |
| C | 1.91352000  | -0.23396000 | -2.18237300 |
| O | 3.38519200  | -0.84872000 | 0.24483100  |
| O | 1.04422000  | -3.46472500 | -0.49272500 |
| O | 2.10978700  | 0.52261000  | 2.38956300  |
| O | 9.48823600  | -1.96029400 | -0.59710100 |
| O | 8.19420500  | -4.02052700 | 0.63421200  |
| C | -7.51235600 | 0.84794500  | -1.61052700 |
| O | -7.60817500 | 0.56664600  | -2.79168600 |
| O | -7.44336000 | 2.12344200  | -1.17840200 |
| C | -7.49778300 | 3.13831300  | -2.19987000 |
| H | 1.87639400  | 1.29674900  | 0.55433300  |
| H | 1.66932600  | -1.70487900 | 1.00352200  |
| H | -0.50590600 | -1.75910000 | -0.15718600 |
| H | -0.29692000 | 1.40756000  | 1.70894200  |
| H | -0.34746200 | -0.34540300 | 1.85734000  |
| H | -0.98686200 | -0.41779500 | -2.84790200 |
| H | -0.65240900 | -2.12351500 | -2.65163200 |
| H | -3.07987300 | -1.76207900 | -2.68993500 |
| H | -2.51900600 | -2.45336200 | -1.18106900 |
| H | -2.28029800 | -0.66574700 | 0.88586500  |
| H | -0.81252600 | 1.58557400  | -2.01018100 |
| H | 0.61889900  | 1.83223700  | -1.03135800 |
| H | -0.91079600 | 2.51084300  | -0.51781500 |



|   |              |             |             |
|---|--------------|-------------|-------------|
| H | -4.93036100  | 2.00485400  | 1.57136500  |
| H | -2.50960500  | 1.51214800  | 1.82434100  |
| H | -2.76779200  | 2.27473300  | 0.27946600  |
| H | -5.23015500  | -2.44209700 | -1.72769500 |
| H | -5.52371400  | -0.81822300 | -2.30371600 |
| H | -7.17525300  | -2.28382400 | -0.20796600 |
| H | -7.63611100  | -1.84226500 | -1.84177500 |
| H | -6.96752700  | 1.31776000  | 0.96945000  |
| H | -9.46185300  | 0.77371700  | 0.01285900  |
| H | -9.62061100  | -0.69124500 | -0.93993500 |
| H | -9.13769300  | -2.09460000 | 1.03379500  |
| H | -10.45297800 | -0.98878400 | 1.39057000  |
| H | -6.50035000  | -0.10503400 | 2.87473200  |
| H | -6.76517700  | -1.56617800 | 1.94917400  |
| H | -4.15982000  | 1.52545400  | -1.59441300 |
| H | -2.63983000  | 1.19546500  | -2.41749100 |
| H | -4.08326300  | 0.33894700  | -2.89598100 |
| H | -8.93139600  | 1.63180000  | 2.04359500  |
| H | -8.50033400  | 1.23242500  | 3.70769200  |
| H | -10.12257300 | 0.86927700  | 3.10024300  |
| H | -8.24587400  | -1.15755100 | 4.47759900  |
| H | -8.49503700  | -2.49916100 | 3.34795900  |
| H | -9.87161000  | -1.51663100 | 3.87484800  |
| H | -3.81695300  | -1.78056100 | 1.57264000  |
| H | -5.28017600  | -2.53637800 | 0.97030800  |
| H | -3.75285300  | -2.89788000 | 0.19909300  |
| H | 5.75169400   | -3.48689700 | 1.40112700  |
| H | 3.59972900   | 3.29940500  | -1.42347300 |
| H | 7.75233800   | 1.20010800  | -1.10786800 |
| H | 7.30753500   | 0.68533200  | 2.00729800  |
| H | 7.01044700   | 3.74051300  | 2.56305800  |
| H | 5.04897700   | 5.56047100  | 0.89841500  |
| H | 2.74721300   | -2.66276400 | -1.39498700 |
| H | 1.32021000   | -2.75854600 | -2.43356500 |
| H | 2.52023600   | -0.85546000 | -2.84327100 |
| H | 1.12697800   | 0.22725400  | -2.77659800 |
| H | 1.43488900   | -4.33695600 | -0.63247800 |
| H | 2.06713400   | -0.35201100 | 2.80420600  |
| H | 9.78714700   | -1.15558500 | -1.04945600 |
| H | 9.07946600   | -3.95225100 | 0.24293900  |
| H | -8.43438600  | 3.07069800  | -2.75749700 |
| H | -6.65955100  | 3.02977100  | -2.89130200 |
| H | -7.43556200  | 4.08892700  | -1.67200800 |

Cartesian coordinates of the lowest-energy conformer of **4'oB (4'oB-1)** at the B3LYP/6-31G(d,p) level in pyridine (PCM).

|   |             |             |             |
|---|-------------|-------------|-------------|
| C | -1.15850000 | 0.11761900  | 2.74122700  |
| C | -2.01364900 | -0.13011000 | 1.49169900  |
| C | -1.49878700 | -1.24638200 | 0.52914400  |
| C | 0.06252100  | -1.05844600 | 0.33663200  |
| C | 0.94190700  | -0.81968100 | 1.60621800  |
| C | 0.30309000  | 0.35592500  | 2.38922200  |
| C | 0.72953100  | -2.10965100 | -0.57289900 |
| C | 2.04539400  | -1.54903000 | -1.13124800 |
| C | 3.07178400  | -1.14146000 | -0.04280600 |
| C | 2.35827700  | -0.32421500 | 1.09461400  |
| C | 1.00905700  | -2.04917100 | 2.54075000  |
| C | 4.21769000  | -0.19318200 | -0.65867300 |
| C | 5.16067700  | 0.25513600  | 0.47719500  |
| C | 4.72713600  | 0.33001700  | 1.74288900  |
| C | 3.35548100  | -0.04051100 | 2.23237300  |
| C | 5.00776900  | -0.95252600 | -1.76785000 |
| C | 6.36894900  | -0.33832700 | -2.12324200 |
| C | 7.28487200  | -0.22621100 | -0.88636400 |
| C | 6.60608500  | 0.67558200  | 0.18289100  |
| C | 8.70112800  | 0.31570300  | -1.25782900 |
| C | 8.73247400  | 1.81306700  | -1.58454900 |
| C | 8.13757600  | 2.69550400  | -0.46470000 |
| C | 6.70881500  | 2.18371000  | -0.16718000 |
| C | 3.71999500  | -2.44161600 | 0.50632500  |
| C | 9.01963600  | 2.66369600  | 0.79998700  |
| C | 8.05351900  | 4.15129400  | -0.95826900 |
| C | 3.63173500  | 1.08527400  | -1.32862700 |

|   |             |             |             |
|---|-------------|-------------|-------------|
| C | -3.83964200 | 2.54459600  | 1.16543600  |
| C | -4.53119400 | 1.36762800  | 0.86402800  |
| C | -5.37464300 | 1.26826200  | -0.25943700 |
| C | -5.48669800 | 2.39625600  | -1.08622100 |
| C | -4.80681600 | 3.58292800  | -0.78955300 |
| C | -3.98592400 | 3.65942200  | 0.33850200  |
| C | -6.15654100 | 0.04604900  | -0.64057800 |
| C | -5.70616100 | -0.89463100 | -1.59666700 |
| C | -6.57560100 | -1.85029500 | -2.13535300 |
| C | -7.89333200 | -1.93207100 | -1.68795600 |
| C | -8.31989700 | -1.08631300 | -0.65552700 |
| C | -7.45534400 | -0.11590400 | -0.13829900 |
| O | -6.25062400 | 2.44775800  | -2.21729100 |
| O | -7.94321700 | 0.63605800  | 0.89901200  |
| O | -9.58177300 | -1.25219000 | -0.17252900 |
| O | -8.73020100 | -2.87341900 | -2.20118700 |
| C | -4.25791000 | -1.04004100 | -1.92355300 |
| O | -3.52070200 | -0.87993300 | -0.79887300 |
| O | -3.79048000 | -1.34918000 | -3.00248200 |
| C | -4.49372500 | 0.18241300  | 1.76699900  |
| O | -5.51502200 | -0.25100300 | 2.28182900  |
| C | -1.97085500 | -2.66884700 | 0.97108800  |
| C | -2.08975100 | -1.01035600 | -0.88824000 |
| O | -3.34163900 | -0.46443000 | 2.02909800  |
| O | -2.05791000 | -2.90079500 | 2.37295400  |
| O | -1.63504000 | 1.28191700  | 3.42810500  |
| O | -4.90985300 | 4.69593900  | -1.57467100 |
| O | -3.32518100 | 4.81232300  | 0.63321700  |
| C | 7.55503200  | -1.61201100 | -0.27898700 |
| O | 7.61951400  | -1.86584600 | 0.90940100  |
| O | 7.80666100  | -2.53824400 | -1.22909700 |
| C | 8.16395300  | -3.85003300 | -0.75216900 |
| H | -1.24951400 | -0.75248900 | 3.39701400  |
| H | -2.08592200 | 0.80871300  | 0.94042900  |
| H | 0.13646400  | -0.10652400 | -0.21247000 |
| H | 0.83852500  | 0.54501200  | 3.32417800  |
| H | 0.36667900  | 1.27788200  | 1.79551800  |
| H | 0.90359700  | -3.04215900 | -0.02596100 |
| H | 0.08945700  | -2.37495100 | -1.41933000 |
| H | 2.49928000  | -2.28410800 | -1.80524800 |
| H | 1.78010700  | -0.68817800 | -1.75235100 |
| H | 2.12601100  | 0.64672400  | 0.64394000  |
| H | 1.42558200  | -2.93134400 | 2.05517800  |
| H | 0.01862100  | -2.33329300 | 2.89575200  |
| H | 1.62935500  | -1.83596900 | 3.41604800  |
| H | 5.42730600  | 0.65320800  | 2.51417600  |
| H | 2.97883500  | 0.76311300  | 2.87765800  |
| H | 3.45522200  | -0.91414500 | 2.89185800  |
| H | 4.38909700  | -1.00230900 | -2.67102100 |
| H | 5.18791600  | -1.98708300 | -1.46797500 |
| H | 6.24477600  | 0.65586200  | -2.56395300 |
| H | 6.85272400  | -0.95493200 | -2.88641000 |
| H | 7.15942700  | 0.52661900  | 1.11460500  |
| H | 9.38054700  | 0.11843500  | -0.41979400 |
| H | 9.08445900  | -0.26190300 | -2.10616100 |
| H | 8.17645100  | 2.00084100  | -2.51231000 |
| H | 9.76971000  | 2.11152900  | -1.78455400 |
| H | 6.27970800  | 2.74933600  | 0.66908800  |
| H | 6.08533200  | 2.41465200  | -1.03694800 |
| H | 4.60468000  | -2.23803500 | 1.11225600  |
| H | 3.02509200  | -3.01259000 | 1.11956500  |
| H | 4.02228800  | -3.10340500 | -0.30953400 |
| H | 10.02621900 | 3.03576400  | 0.57704600  |
| H | 9.12591500  | 1.66060600  | 1.22177000  |
| H | 8.59311400  | 3.30397400  | 1.58045600  |
| H | 7.61047100  | 4.80135900  | -0.19504900 |
| H | 7.43964000  | 4.22917900  | -1.86283000 |
| H | 9.04951300  | 4.54386800  | -1.19402000 |
| H | 3.19593400  | 1.77774200  | -0.60578500 |
| H | 4.41657500  | 1.63218400  | -1.85398200 |
| H | 2.87219600  | 0.84384500  | -2.07666500 |
| H | -3.18523800 | 2.60606100  | 2.02769000  |
| H | -6.21618800 | -2.56178500 | -2.86977500 |
| H | -6.67500900 | 1.58774300  | -2.36038600 |
| H | -7.23893700 | 0.64790100  | 1.57938300  |
| H | -9.68222900 | -0.65650000 | 0.58930400  |

|   |             |             |             |
|---|-------------|-------------|-------------|
| H | -9.57876800 | -2.81249100 | -1.73465400 |
| H | -2.94747000 | -2.85877000 | 0.51125100  |
| H | -1.27703900 | -3.41514100 | 0.57684300  |
| H | -1.68948300 | -0.09151700 | -1.32863500 |
| H | -1.86282400 | -1.83761000 | -1.56266600 |
| H | -2.82065000 | -2.39221200 | 2.68510800  |
| H | -2.41116600 | 1.02096100  | 3.94214700  |
| H | -5.50659600 | 4.49821600  | -2.31326300 |
| H | -3.54907100 | 5.47002600  | -0.04409800 |
| H | 8.33200500  | -4.45101700 | -1.64482400 |
| H | 7.35471900  | -4.27370200 | -0.15364800 |
| H | 9.07160300  | -3.80318600 | -0.14649700 |
